# Supplementary material for: A systems-based method to repurpose marketed therapeutics for antiviral use: a SARS-CoV-2 case study
Source: Life Sci Alliance. 2021 Feb 16;4(5):e202000904. doi: 10.26508/lsa.202000904 (PMC7893815; doi:10.26508/lsa.202000904)
Supplement: Supplementary file 1 [file LSA-2020-00904_TableS1.xlsx]

## Sheet: HIV approved drugs
ID	Name
DB00004	Denileukin diftitox
DB00005	Etanercept
DB00007	Leuprolide
DB00008	Peginterferon alfa-2a
DB00028	Immune Globulin Human
DB00033	Interferon gamma-1b
DB00034	Interferon Alfa-2a, Recombinant
DB00099	Filgrastim
DB00105	Interferon alfa-2b
DB00495	Zidovudine
DB00503	Ritonavir
DB00673	Aprepitant
DB00704	Naltrexone
DB00877	Sirolimus
DB00900	Didanosine
DB01030	Topotecan
DB02546	Vorinostat
DB04835	Maraviroc
DB04941	Crofelemer
DB05389	Tetrachlorodecaoxide
DB05740	RPI-78M
DB06186	Ipilimumab
DB06652	Vicriviroc
DB06719	Buserelin
DB06809	Plerixafor
DB08864	Rilpivirine
DB12698	Ibalizumab

## Sheet: HBV approved drugs
ID	Name
DB00008	peginterferon alfa-2a
DB00011	interferon alfa-n1
DB00018	interferon alfa-n3
DB00022	peginterferon alfa-2b
DB00033	interferon gamma-1b
DB00034	interferon alfa-2a, recombinant
DB00060	interferon beta-1a
DB00068	interferon beta-1b
DB00069	interferon alfacon-1
DB00105	interferon alfa-2b
DB05258	interferon alfa

## Sheet: HCV approved drugs
ID	Name
DB00008	peginterferon alfa-2a
DB00011	interferon alfa-n1
DB00018	interferon alfa-n3
DB00022	peginterferon alfa-2b
DB00033	interferon gamma-1b
DB00034	interferon alfa-2a, recombinant
DB00060	interferon beta-1a
DB00068	interferon beta-1b
DB00069	interferon alfacon-1
DB00105	interferon alfa-2b
DB00811	ribavirin
DB05258	interferon alfa

## Sheet: HPV approved drugs
ID	Name
DB00008	peginterferon alfa-2a
DB00011	interferon alfa-n1
DB00018	interferon alfa-n3
DB00022	peginterferon alfa-2b
DB00033	interferon gamma-1b
DB00034	interferon alfa-2a, recombinant
DB00060	interferon beta-1a
DB00068	interferon beta-1b
DB00069	interferon alfacon-1
DB00105	interferon alfa-2b
DB00281	lidocaine
DB05258	interferon alfa

## Sheet: HIV-1 Interactions
HIV gene ID	HIV gene	Human gene	Human Entrez ID
19424028	Asp	3105	HLA-A
19424028	Asp	3106	HLA-B
19424028	Asp	3458	IFNG
19424028	Asp	6351	CCL4
19424028	Asp	3558	IL2
19424028	Asp	7124	TNF
19424028	Asp	3105	HLA-A
19424028	Asp	3105	HLA-A
19424028	Asp	3107	HLA-C
19424028	Asp	3107	HLA-C
19424028	Asp	3106	HLA-B
19424028	Asp	3106	HLA-B
19424028	Asp	81631	MAP1LC3B
19424028	Asp	4790	NFKB1
19424028	Asp	7391	USF1
19424028	Asp	7124	TNF
19424028	Asp	8678	BECN1
19424028	Asp	3458	IFNG
19424028	Asp	81631	MAP1LC3B
155971	Envelope surface glycoprotein gp120	2147	F2
155971	Envelope surface glycoprotein gp120	23236	PLCB1
155971	Envelope surface glycoprotein gp120	5335	PLCG1
155971	Envelope surface glycoprotein gp120	4313	MMP2
155971	Envelope surface glycoprotein gp120	8398	PLA2G6
155971	Envelope surface glycoprotein gp120	8398	PLA2G6
155971	Envelope surface glycoprotein gp120	1234	CCR5
155971	Envelope surface glycoprotein gp120	1234	CCR5
155971	Envelope surface glycoprotein gp120	1234	CCR5
155971	Envelope surface glycoprotein gp120	1234	CCR5
155971	Envelope surface glycoprotein gp120	7852	CXCR4
155971	Envelope surface glycoprotein gp120	7852	CXCR4
155971	Envelope surface glycoprotein gp120	7852	CXCR4
155971	Envelope surface glycoprotein gp120	5322	PLA2G5
155971	Envelope surface glycoprotein gp120	5322	PLA2G5
155971	Envelope surface glycoprotein gp120	823	CAPN1
155971	Envelope surface glycoprotein gp120	824	CAPN2
155971	Envelope surface glycoprotein gp120	825	CAPN3
155971	Envelope surface glycoprotein gp120	836	CASP3
155971	Envelope surface glycoprotein gp120	836	CASP3
155971	Envelope surface glycoprotein gp120	836	CASP3
155971	Envelope surface glycoprotein gp120	836	CASP3
155971	Envelope surface glycoprotein gp120	836	CASP3
155971	Envelope surface glycoprotein gp120	836	CASP3
155971	Envelope surface glycoprotein gp120	836	CASP3
155971	Envelope surface glycoprotein gp120	836	CASP3
155971	Envelope surface glycoprotein gp120	836	CASP3
155971	Envelope surface glycoprotein gp120	841	CASP8
155971	Envelope surface glycoprotein gp120	841	CASP8
155971	Envelope surface glycoprotein gp120	841	CASP8
155971	Envelope surface glycoprotein gp120	841	CASP8
155971	Envelope surface glycoprotein gp120	842	CASP9
155971	Envelope surface glycoprotein gp120	842	CASP9
155971	Envelope surface glycoprotein gp120	842	CASP9
155971	Envelope surface glycoprotein gp120	998	CDC42
155971	Envelope surface glycoprotein gp120	998	CDC42
155971	Envelope surface glycoprotein gp120	7157	TP53
155971	Envelope surface glycoprotein gp120	1072	CFL1
155971	Envelope surface glycoprotein gp120	1073	CFL2
155971	Envelope surface glycoprotein gp120	283748	PLA2G4D
155971	Envelope surface glycoprotein gp120	283748	PLA2G4D
155971	Envelope surface glycoprotein gp120	8605	PLA2G4C
155971	Envelope surface glycoprotein gp120	8605	PLA2G4C
155971	Envelope surface glycoprotein gp120	5321	PLA2G4A
155971	Envelope surface glycoprotein gp120	5321	PLA2G4A
155971	Envelope surface glycoprotein gp120	255189	PLA2G4F
155971	Envelope surface glycoprotein gp120	255189	PLA2G4F
155971	Envelope surface glycoprotein gp120	2838	GPR15
155971	Envelope surface glycoprotein gp120	2902	GRIN1
155971	Envelope surface glycoprotein gp120	2902	GRIN1
155971	Envelope surface glycoprotein gp120	2902	GRIN1
155971	Envelope surface glycoprotein gp120	2903	GRIN2A
155971	Envelope surface glycoprotein gp120	2903	GRIN2A
155971	Envelope surface glycoprotein gp120	2903	GRIN2A
155971	Envelope surface glycoprotein gp120	2904	GRIN2B
155971	Envelope surface glycoprotein gp120	2904	GRIN2B
155971	Envelope surface glycoprotein gp120	2904	GRIN2B
155971	Envelope surface glycoprotein gp120	2905	GRIN2C
155971	Envelope surface glycoprotein gp120	2905	GRIN2C
155971	Envelope surface glycoprotein gp120	2905	GRIN2C
155971	Envelope surface glycoprotein gp120	2906	GRIN2D
155971	Envelope surface glycoprotein gp120	2906	GRIN2D
155971	Envelope surface glycoprotein gp120	2906	GRIN2D
155971	Envelope surface glycoprotein gp120	116443	GRIN3A
155971	Envelope surface glycoprotein gp120	116443	GRIN3A
155971	Envelope surface glycoprotein gp120	116444	GRIN3B
155971	Envelope surface glycoprotein gp120	116444	GRIN3B
155971	Envelope surface glycoprotein gp120	8399	PLA2G10
155971	Envelope surface glycoprotein gp120	8399	PLA2G10
155971	Envelope surface glycoprotein gp120	50487	PLA2G3
155971	Envelope surface glycoprotein gp120	50487	PLA2G3
155971	Envelope surface glycoprotein gp120	26279	PLA2G2D
155971	Envelope surface glycoprotein gp120	26279	PLA2G2D
155971	Envelope surface glycoprotein gp120	30814	PLA2G2E
155971	Envelope surface glycoprotein gp120	30814	PLA2G2E
155971	Envelope surface glycoprotein gp120	64600	PLA2G2F
155971	Envelope surface glycoprotein gp120	64600	PLA2G2F
155971	Envelope surface glycoprotein gp120	81579	PLA2G12A
155971	Envelope surface glycoprotein gp120	81579	PLA2G12A
155971	Envelope surface glycoprotein gp120	84647	PLA2G12B
155971	Envelope surface glycoprotein gp120	84647	PLA2G12B
155971	Envelope surface glycoprotein gp120	9641	IKBKE
155971	Envelope surface glycoprotein gp120	3683	ITGAL
155971	Envelope surface glycoprotein gp120	3683	ITGAL
155971	Envelope surface glycoprotein gp120	3383	ICAM1
155971	Envelope surface glycoprotein gp120	5610	EIF2AK2
155971	Envelope surface glycoprotein gp120	3553	IL1B
155971	Envelope surface glycoprotein gp120	7850	IL1R2
155971	Envelope surface glycoprotein gp120	3586	IL10
155971	Envelope surface glycoprotein gp120	8681	JMJD7-PLA2G4B
155971	Envelope surface glycoprotein gp120	8681	JMJD7-PLA2G4B
155971	Envelope surface glycoprotein gp120	3984	LIMK1
155971	Envelope surface glycoprotein gp120	3984	LIMK1
155971	Envelope surface glycoprotein gp120	3985	LIMK2
155971	Envelope surface glycoprotein gp120	27040	LAT
155971	Envelope surface glycoprotein gp120	3937	LCP2
155971	Envelope surface glycoprotein gp120	4318	MMP9
155971	Envelope surface glycoprotein gp120	4318	MMP9
155971	Envelope surface glycoprotein gp120	5594	MAPK1
155971	Envelope surface glycoprotein gp120	5594	MAPK1
155971	Envelope surface glycoprotein gp120	5594	MAPK1
155971	Envelope surface glycoprotein gp120	5594	MAPK1
155971	Envelope surface glycoprotein gp120	5594	MAPK1
155971	Envelope surface glycoprotein gp120	5594	MAPK1
155971	Envelope surface glycoprotein gp120	5602	MAPK10
155971	Envelope surface glycoprotein gp120	5602	MAPK10
155971	Envelope surface glycoprotein gp120	5600	MAPK11
155971	Envelope surface glycoprotein gp120	6300	MAPK12
155971	Envelope surface glycoprotein gp120	5603	MAPK13
155971	Envelope surface glycoprotein gp120	1432	MAPK14
155971	Envelope surface glycoprotein gp120	1432	MAPK14
155971	Envelope surface glycoprotein gp120	1432	MAPK14
155971	Envelope surface glycoprotein gp120	1432	MAPK14
155971	Envelope surface glycoprotein gp120	1432	MAPK14
155971	Envelope surface glycoprotein gp120	1432	MAPK14
155971	Envelope surface glycoprotein gp120	1432	MAPK14
155971	Envelope surface glycoprotein gp120	1432	MAPK14
155971	Envelope surface glycoprotein gp120	1432	MAPK14
155971	Envelope surface glycoprotein gp120	225689	MAPK15
155971	Envelope surface glycoprotein gp120	5595	MAPK3
155971	Envelope surface glycoprotein gp120	5595	MAPK3
155971	Envelope surface glycoprotein gp120	5595	MAPK3
155971	Envelope surface glycoprotein gp120	5595	MAPK3
155971	Envelope surface glycoprotein gp120	5595	MAPK3
155971	Envelope surface glycoprotein gp120	5595	MAPK3
155971	Envelope surface glycoprotein gp120	5596	MAPK4
155971	Envelope surface glycoprotein gp120	5597	MAPK6
155971	Envelope surface glycoprotein gp120	5598	MAPK7
155971	Envelope surface glycoprotein gp120	5599	MAPK8
155971	Envelope surface glycoprotein gp120	5599	MAPK8
155971	Envelope surface glycoprotein gp120	5599	MAPK8
155971	Envelope surface glycoprotein gp120	5601	MAPK9
155971	Envelope surface glycoprotein gp120	5601	MAPK9
155971	Envelope surface glycoprotein gp120	4217	MAP3K5
155971	Envelope surface glycoprotein gp120	2358	FPR2
155971	Envelope surface glycoprotein gp120	2358	FPR2
155971	Envelope surface glycoprotein gp120	27035	NOX1
155971	Envelope surface glycoprotein gp120	50508	NOX3
155971	Envelope surface glycoprotein gp120	50507	NOX4
155971	Envelope surface glycoprotein gp120	79400	NOX5
155971	Envelope surface glycoprotein gp120	4790	NFKB1
155971	Envelope surface glycoprotein gp120	4790	NFKB1
155971	Envelope surface glycoprotein gp120	4790	NFKB1
155971	Envelope surface glycoprotein gp120	4790	NFKB1
155971	Envelope surface glycoprotein gp120	4790	NFKB1
155971	Envelope surface glycoprotein gp120	4790	NFKB1
155971	Envelope surface glycoprotein gp120	4790	NFKB1
155971	Envelope surface glycoprotein gp120	4790	NFKB1
155971	Envelope surface glycoprotein gp120	4790	NFKB1
155971	Envelope surface glycoprotein gp120	4790	NFKB1
155971	Envelope surface glycoprotein gp120	4772	NFATC1
155971	Envelope surface glycoprotein gp120	4773	NFATC2
155971	Envelope surface glycoprotein gp120	4775	NFATC3
155971	Envelope surface glycoprotein gp120	4776	NFATC4
155971	Envelope surface glycoprotein gp120	5829	PXN
155971	Envelope surface glycoprotein gp120	5289	PIK3C3
155971	Envelope surface glycoprotein gp120	5289	PIK3C3
155971	Envelope surface glycoprotein gp120	5295	PIK3R1
155971	Envelope surface glycoprotein gp120	5295	PIK3R1
155971	Envelope surface glycoprotein gp120	5295	PIK3R1
155971	Envelope surface glycoprotein gp120	5296	PIK3R2
155971	Envelope surface glycoprotein gp120	5296	PIK3R2
155971	Envelope surface glycoprotein gp120	5296	PIK3R2
155971	Envelope surface glycoprotein gp120	5290	PIK3CA
155971	Envelope surface glycoprotein gp120	5290	PIK3CA
155971	Envelope surface glycoprotein gp120	5290	PIK3CA
155971	Envelope surface glycoprotein gp120	5291	PIK3CB
155971	Envelope surface glycoprotein gp120	5291	PIK3CB
155971	Envelope surface glycoprotein gp120	5291	PIK3CB
155971	Envelope surface glycoprotein gp120	5293	PIK3CD
155971	Envelope surface glycoprotein gp120	5293	PIK3CD
155971	Envelope surface glycoprotein gp120	5293	PIK3CD
155971	Envelope surface glycoprotein gp120	5294	PIK3CG
155971	Envelope surface glycoprotein gp120	5294	PIK3CG
155971	Envelope surface glycoprotein gp120	5294	PIK3CG
155971	Envelope surface glycoprotein gp120	5286	PIK3C2A
155971	Envelope surface glycoprotein gp120	5286	PIK3C2A
155971	Envelope surface glycoprotein gp120	5286	PIK3C2A
155971	Envelope surface glycoprotein gp120	5287	PIK3C2B
155971	Envelope surface glycoprotein gp120	5287	PIK3C2B
155971	Envelope surface glycoprotein gp120	5287	PIK3C2B
155971	Envelope surface glycoprotein gp120	5288	PIK3C2G
155971	Envelope surface glycoprotein gp120	5288	PIK3C2G
155971	Envelope surface glycoprotein gp120	5288	PIK3C2G
155971	Envelope surface glycoprotein gp120	8394	PIP5K1A
155971	Envelope surface glycoprotein gp120	5319	PLA2G1B
155971	Envelope surface glycoprotein gp120	5319	PLA2G1B
155971	Envelope surface glycoprotein gp120	5320	PLA2G2A
155971	Envelope surface glycoprotein gp120	5320	PLA2G2A
155971	Envelope surface glycoprotein gp120	5337	PLD1
155971	Envelope surface glycoprotein gp120	5338	PLD2
155971	Envelope surface glycoprotein gp120	7941	PLA2G7
155971	Envelope surface glycoprotein gp120	7941	PLA2G7
155971	Envelope surface glycoprotein gp120	81488	POLR2M
155971	Envelope surface glycoprotein gp120	5578	PRKCA
155971	Envelope surface glycoprotein gp120	5579	PRKCB
155971	Envelope surface glycoprotein gp120	5580	PRKCD
155971	Envelope surface glycoprotein gp120	5581	PRKCE
155971	Envelope surface glycoprotein gp120	5583	PRKCH
155971	Envelope surface glycoprotein gp120	5582	PRKCG
155971	Envelope surface glycoprotein gp120	5584	PRKCI
155971	Envelope surface glycoprotein gp120	5588	PRKCQ
155971	Envelope surface glycoprotein gp120	5590	PRKCZ
155971	Envelope surface glycoprotein gp120	2907	GRINA
155971	Envelope surface glycoprotein gp120	2907	GRINA
155971	Envelope surface glycoprotein gp120	2185	PTK2B
155971	Envelope surface glycoprotein gp120	2185	PTK2B
155971	Envelope surface glycoprotein gp120	2185	PTK2B
155971	Envelope surface glycoprotein gp120	2353	FOS
155971	Envelope surface glycoprotein gp120	6714	SRC
155971	Envelope surface glycoprotein gp120	391013	PLA2G2C
155971	Envelope surface glycoprotein gp120	391013	PLA2G2C
155971	Envelope surface glycoprotein gp120	207	AKT1
155971	Envelope surface glycoprotein gp120	207	AKT1
155971	Envelope surface glycoprotein gp120	207	AKT1
155971	Envelope surface glycoprotein gp120	208	AKT2
155971	Envelope surface glycoprotein gp120	208	AKT2
155971	Envelope surface glycoprotein gp120	10000	AKT3
155971	Envelope surface glycoprotein gp120	10000	AKT3
155971	Envelope surface glycoprotein gp120	5894	RAF1
155971	Envelope surface glycoprotein gp120	5894	RAF1
155971	Envelope surface glycoprotein gp120	5894	RAF1
155971	Envelope surface glycoprotein gp120	5879	RAC1
155971	Envelope surface glycoprotein gp120	5879	RAC1
155971	Envelope surface glycoprotein gp120	5879	RAC1
155971	Envelope surface glycoprotein gp120	5058	PAK1
155971	Envelope surface glycoprotein gp120	6772	STAT1
155971	Envelope surface glycoprotein gp120	6773	STAT2
155971	Envelope surface glycoprotein gp120	6774	STAT3
155971	Envelope surface glycoprotein gp120	6774	STAT3
155971	Envelope surface glycoprotein gp120	6610	SMPD2
155971	Envelope surface glycoprotein gp120	6610	SMPD2
155971	Envelope surface glycoprotein gp120	55512	SMPD3
155971	Envelope surface glycoprotein gp120	55512	SMPD3
155971	Envelope surface glycoprotein gp120	55627	SMPD4
155971	Envelope surface glycoprotein gp120	55627	SMPD4
155971	Envelope surface glycoprotein gp120	6609	SMPD1
155971	Envelope surface glycoprotein gp120	3725	JUN
155971	Envelope surface glycoprotein gp120	1869	E2F1
155971	Envelope surface glycoprotein gp120	5970	RELA
155971	Envelope surface glycoprotein gp120	5970	RELA
155971	Envelope surface glycoprotein gp120	7124	TNF
155971	Envelope surface glycoprotein gp120	1445	CSK
155971	Envelope surface glycoprotein gp120	2534	FYN
155971	Envelope surface glycoprotein gp120	3932	LCK
155971	Envelope surface glycoprotein gp120	3932	LCK
155971	Envelope surface glycoprotein gp120	3932	LCK
155971	Envelope surface glycoprotein gp120	3932	LCK
155971	Envelope surface glycoprotein gp120	4067	LYN
155971	Envelope surface glycoprotein gp120	4067	LYN
155971	Envelope surface glycoprotein gp120	7535	ZAP70
155971	Envelope surface glycoprotein gp120	5781	PTPN11
155971	Envelope surface glycoprotein gp120	7433	VIPR1
155971	Envelope surface glycoprotein gp120	7454	WAS
155971	Envelope surface glycoprotein gp120	10109	ARPC2
155971	Envelope surface glycoprotein gp120	1230	CCR1
155971	Envelope surface glycoprotein gp120	729230	CCR2
155971	Envelope surface glycoprotein gp120	1234	CCR5
155971	Envelope surface glycoprotein gp120	1237	CCR8
155971	Envelope surface glycoprotein gp120	821	CANX
155971	Envelope surface glycoprotein gp120	836	CASP3
155971	Envelope surface glycoprotein gp120	1524	CX3CR1
155971	Envelope surface glycoprotein gp120	4046	LSP1
155971	Envelope surface glycoprotein gp120	7454	WAS
155971	Envelope surface glycoprotein gp120	7368	UGT8
155971	Envelope surface glycoprotein gp120	1134	CHRNA1
155971	Envelope surface glycoprotein gp120	1140	CHRNB1
155971	Envelope surface glycoprotein gp120	5004	ORM1
155971	Envelope surface glycoprotein gp120	5005	ORM2
155971	Envelope surface glycoprotein gp120	462	SERPINC1
155971	Envelope surface glycoprotein gp120	187	APLNR
155971	Envelope surface glycoprotein gp120	1238	ACKR2
155971	Envelope surface glycoprotein gp120	55894	DEFB103B
155971	Envelope surface glycoprotein gp120	1673	DEFB4A
155971	Envelope surface glycoprotein gp120	729230	CCR2
155971	Envelope surface glycoprotein gp120	1232	CCR3
155971	Envelope surface glycoprotein gp120	1232	CCR3
155971	Envelope surface glycoprotein gp120	1232	CCR3
155971	Envelope surface glycoprotein gp120	1232	CCR3
155971	Envelope surface glycoprotein gp120	1232	CCR3
155971	Envelope surface glycoprotein gp120	1232	CCR3
155971	Envelope surface glycoprotein gp120	1233	CCR4
155971	Envelope surface glycoprotein gp120	1234	CCR5
155971	Envelope surface glycoprotein gp120	1234	CCR5
155971	Envelope surface glycoprotein gp120	1234	CCR5
155971	Envelope surface glycoprotein gp120	1234	CCR5
155971	Envelope surface glycoprotein gp120	1234	CCR5
155971	Envelope surface glycoprotein gp120	1234	CCR5
155971	Envelope surface glycoprotein gp120	1234	CCR5
155971	Envelope surface glycoprotein gp120	1234	CCR5
155971	Envelope surface glycoprotein gp120	1234	CCR5
155971	Envelope surface glycoprotein gp120	1234	CCR5
155971	Envelope surface glycoprotein gp120	1234	CCR5
155971	Envelope surface glycoprotein gp120	1234	CCR5
155971	Envelope surface glycoprotein gp120	1234	CCR5
155971	Envelope surface glycoprotein gp120	1234	CCR5
155971	Envelope surface glycoprotein gp120	1234	CCR5
155971	Envelope surface glycoprotein gp120	1234	CCR5
155971	Envelope surface glycoprotein gp120	1234	CCR5
155971	Envelope surface glycoprotein gp120	1234	CCR5
155971	Envelope surface glycoprotein gp120	1234	CCR5
155971	Envelope surface glycoprotein gp120	1234	CCR5
155971	Envelope surface glycoprotein gp120	1234	CCR5
155971	Envelope surface glycoprotein gp120	1237	CCR8
155971	Envelope surface glycoprotein gp120	6352	CCL5
155971	Envelope surface glycoprotein gp120	50856	CLEC4A
155971	Envelope surface glycoprotein gp120	50856	CLEC4A
155971	Envelope surface glycoprotein gp120	50856	CLEC4A
155971	Envelope surface glycoprotein gp120	170482	CLEC4C
155971	Envelope surface glycoprotein gp120	339390	CLEC4G
155971	Envelope surface glycoprotein gp120	50489	CD207
155971	Envelope surface glycoprotein gp120	10332	CLEC4M
155971	Envelope surface glycoprotein gp120	10332	CLEC4M
155971	Envelope surface glycoprotein gp120	10332	CLEC4M
155971	Envelope surface glycoprotein gp120	9902	MRC2
155971	Envelope surface glycoprotein gp120	9902	MRC2
155971	Envelope surface glycoprotein gp120	9902	MRC2
155971	Envelope surface glycoprotein gp120	7852	CXCR4
155971	Envelope surface glycoprotein gp120	7852	CXCR4
155971	Envelope surface glycoprotein gp120	7852	CXCR4
155971	Envelope surface glycoprotein gp120	7852	CXCR4
155971	Envelope surface glycoprotein gp120	7852	CXCR4
155971	Envelope surface glycoprotein gp120	7852	CXCR4
155971	Envelope surface glycoprotein gp120	7852	CXCR4
155971	Envelope surface glycoprotein gp120	7852	CXCR4
155971	Envelope surface glycoprotein gp120	7852	CXCR4
155971	Envelope surface glycoprotein gp120	7852	CXCR4
155971	Envelope surface glycoprotein gp120	7852	CXCR4
155971	Envelope surface glycoprotein gp120	7852	CXCR4
155971	Envelope surface glycoprotein gp120	7852	CXCR4
155971	Envelope surface glycoprotein gp120	7852	CXCR4
155971	Envelope surface glycoprotein gp120	7852	CXCR4
155971	Envelope surface glycoprotein gp120	7852	CXCR4
155971	Envelope surface glycoprotein gp120	7852	CXCR4
155971	Envelope surface glycoprotein gp120	7852	CXCR4
155971	Envelope surface glycoprotein gp120	7852	CXCR4
155971	Envelope surface glycoprotein gp120	10663	CXCR6
155971	Envelope surface glycoprotein gp120	6545	SLC7A4
155971	Envelope surface glycoprotein gp120	30835	CD209
155971	Envelope surface glycoprotein gp120	30835	CD209
155971	Envelope surface glycoprotein gp120	30835	CD209
155971	Envelope surface glycoprotein gp120	30835	CD209
155971	Envelope surface glycoprotein gp120	30835	CD209
155971	Envelope surface glycoprotein gp120	30835	CD209
155971	Envelope surface glycoprotein gp120	30835	CD209
155971	Envelope surface glycoprotein gp120	30835	CD209
155971	Envelope surface glycoprotein gp120	30835	CD209
155971	Envelope surface glycoprotein gp120	30835	CD209
155971	Envelope surface glycoprotein gp120	30835	CD209
155971	Envelope surface glycoprotein gp120	30835	CD209
155971	Envelope surface glycoprotein gp120	30835	CD209
155971	Envelope surface glycoprotein gp120	30835	CD209
155971	Envelope surface glycoprotein gp120	30835	CD209
155971	Envelope surface glycoprotein gp120	30835	CD209
155971	Envelope surface glycoprotein gp120	30835	CD209
155971	Envelope surface glycoprotein gp120	30835	CD209
155971	Envelope surface glycoprotein gp120	30835	CD209
155971	Envelope surface glycoprotein gp120	30835	CD209
155971	Envelope surface glycoprotein gp120	30835	CD209
155971	Envelope surface glycoprotein gp120	712	C1QA
155971	Envelope surface glycoprotein gp120	713	C1QB
155971	Envelope surface glycoprotein gp120	714	C1QC
155971	Envelope surface glycoprotein gp120	718	C3
155971	Envelope surface glycoprotein gp120	718	C3
155971	Envelope surface glycoprotein gp120	718	C3
155971	Envelope surface glycoprotein gp120	721	C4B
155971	Envelope surface glycoprotein gp120	721	C4B
155971	Envelope surface glycoprotein gp120	721	C4B
155971	Envelope surface glycoprotein gp120	727	C5
155971	Envelope surface glycoprotein gp120	727	C5
155971	Envelope surface glycoprotein gp120	735	C9
155971	Envelope surface glycoprotein gp120	1380	CR2
155971	Envelope surface glycoprotein gp120	1755	DMBT1
155971	Envelope surface glycoprotein gp120	1755	DMBT1
155971	Envelope surface glycoprotein gp120	220972	2021-03-08
155971	Envelope surface glycoprotein gp120	7430	EZR
155971	Envelope surface glycoprotein gp120	2335	FN1
155971	Envelope surface glycoprotein gp120	2335	FN1
155971	Envelope surface glycoprotein gp120	2316	FLNA
155971	Envelope surface glycoprotein gp120	2317	FLNB
155971	Envelope surface glycoprotein gp120	2318	FLNC
155971	Envelope surface glycoprotein gp120	3956	LGALS1
155971	Envelope surface glycoprotein gp120	2902	GRIN1
155971	Envelope surface glycoprotein gp120	2903	GRIN2A
155971	Envelope surface glycoprotein gp120	2904	GRIN2B
155971	Envelope surface glycoprotein gp120	2905	GRIN2C
155971	Envelope surface glycoprotein gp120	2906	GRIN2D
155971	Envelope surface glycoprotein gp120	116443	GRIN3A
155971	Envelope surface glycoprotein gp120	116444	GRIN3B
155971	Envelope surface glycoprotein gp120	2209	FCGR1A
155971	Envelope surface glycoprotein gp120	2210	FCGR1B
155971	Envelope surface glycoprotein gp120	3676	ITGA4
155971	Envelope surface glycoprotein gp120	3676	ITGA4
155971	Envelope surface glycoprotein gp120	3676	ITGA4
155971	Envelope surface glycoprotein gp120	3676	ITGA4
155971	Envelope surface glycoprotein gp120	3676	ITGA4
155971	Envelope surface glycoprotein gp120	3676	ITGA4
155971	Envelope surface glycoprotein gp120	3676	ITGA4
155971	Envelope surface glycoprotein gp120	3676	ITGA4
155971	Envelope surface glycoprotein gp120	3695	ITGB7
155971	Envelope surface glycoprotein gp120	3695	ITGB7
155971	Envelope surface glycoprotein gp120	3695	ITGB7
155971	Envelope surface glycoprotein gp120	3695	ITGB7
155971	Envelope surface glycoprotein gp120	3695	ITGB7
155971	Envelope surface glycoprotein gp120	3695	ITGB7
155971	Envelope surface glycoprotein gp120	3695	ITGB7
155971	Envelope surface glycoprotein gp120	4057	LTF
155971	Envelope surface glycoprotein gp120	2212	FCGR2A
155971	Envelope surface glycoprotein gp120	2213	FCGR2B
155971	Envelope surface glycoprotein gp120	2214	FCGR3A
155971	Envelope surface glycoprotein gp120	2215	FCGR3B
155971	Envelope surface glycoprotein gp120	4360	MRC1
155971	Envelope surface glycoprotein gp120	4360	MRC1
155971	Envelope surface glycoprotein gp120	4360	MRC1
155971	Envelope surface glycoprotein gp120	4153	MBL2
155971	Envelope surface glycoprotein gp120	4153	MBL2
155971	Envelope surface glycoprotein gp120	4153	MBL2
155971	Envelope surface glycoprotein gp120	4153	MBL2
155971	Envelope surface glycoprotein gp120	4478	MSN
155971	Envelope surface glycoprotein gp120	4099	MAG
155971	Envelope surface glycoprotein gp120	1141	CHRNB2
155971	Envelope surface glycoprotein gp120	1667	DEFA1
155971	Envelope surface glycoprotein gp120	1667	DEFA1
155971	Envelope surface glycoprotein gp120	1668	DEFA3
155971	Envelope surface glycoprotein gp120	1669	DEFA4
155971	Envelope surface glycoprotein gp120	2280	FKBP1A
155971	Envelope surface glycoprotein gp120	5196	PF4
155971	Envelope surface glycoprotein gp120	5196	PF4
155971	Envelope surface glycoprotein gp120	23416	KCNH3
155971	Envelope surface glycoprotein gp120	5199	CFP
155971	Envelope surface glycoprotein gp120	5199	CFP
155971	Envelope surface glycoprotein gp120	3998	LMAN1
155971	Envelope surface glycoprotein gp120	3998	LMAN1
155971	Envelope surface glycoprotein gp120	3998	LMAN1
155971	Envelope surface glycoprotein gp120	3998	LMAN1
155971	Envelope surface glycoprotein gp120	2907	GRINA
155971	Envelope surface glycoprotein gp120	653509	SFTPA1
155971	Envelope surface glycoprotein gp120	6441	SFTPD
155971	Envelope surface glycoprotein gp120	6441	SFTPD
155971	Envelope surface glycoprotein gp120	213	ALB
155971	Envelope surface glycoprotein gp120	213	ALB
155971	Envelope surface glycoprotein gp120	213	ALB
155971	Envelope surface glycoprotein gp120	213	ALB
155971	Envelope surface glycoprotein gp120	27036	SIGLEC7
155971	Envelope surface glycoprotein gp120	6382	SDC1
155971	Envelope surface glycoprotein gp120	6383	SDC2
155971	Envelope surface glycoprotein gp120	6383	SDC2
155971	Envelope surface glycoprotein gp120	9672	SDC3
155971	Envelope surface glycoprotein gp120	6385	SDC4
155971	Envelope surface glycoprotein gp120	920	CD4
155971	Envelope surface glycoprotein gp120	920	CD4
155971	Envelope surface glycoprotein gp120	920	CD4
155971	Envelope surface glycoprotein gp120	920	CD4
155971	Envelope surface glycoprotein gp120	920	CD4
155971	Envelope surface glycoprotein gp120	920	CD4
155971	Envelope surface glycoprotein gp120	920	CD4
155971	Envelope surface glycoprotein gp120	920	CD4
155971	Envelope surface glycoprotein gp120	920	CD4
155971	Envelope surface glycoprotein gp120	920	CD4
155971	Envelope surface glycoprotein gp120	920	CD4
155971	Envelope surface glycoprotein gp120	920	CD4
155971	Envelope surface glycoprotein gp120	920	CD4
155971	Envelope surface glycoprotein gp120	920	CD4
155971	Envelope surface glycoprotein gp120	920	CD4
155971	Envelope surface glycoprotein gp120	920	CD4
155971	Envelope surface glycoprotein gp120	920	CD4
155971	Envelope surface glycoprotein gp120	920	CD4
155971	Envelope surface glycoprotein gp120	920	CD4
155971	Envelope surface glycoprotein gp120	920	CD4
155971	Envelope surface glycoprotein gp120	920	CD4
155971	Envelope surface glycoprotein gp120	920	CD4
155971	Envelope surface glycoprotein gp120	920	CD4
155971	Envelope surface glycoprotein gp120	920	CD4
155971	Envelope surface glycoprotein gp120	920	CD4
155971	Envelope surface glycoprotein gp120	920	CD4
155971	Envelope surface glycoprotein gp120	920	CD4
155971	Envelope surface glycoprotein gp120	920	CD4
155971	Envelope surface glycoprotein gp120	920	CD4
155971	Envelope surface glycoprotein gp120	920	CD4
155971	Envelope surface glycoprotein gp120	920	CD4
155971	Envelope surface glycoprotein gp120	920	CD4
155971	Envelope surface glycoprotein gp120	920	CD4
155971	Envelope surface glycoprotein gp120	920	CD4
155971	Envelope surface glycoprotein gp120	920	CD4
155971	Envelope surface glycoprotein gp120	920	CD4
155971	Envelope surface glycoprotein gp120	920	CD4
155971	Envelope surface glycoprotein gp120	920	CD4
155971	Envelope surface glycoprotein gp120	920	CD4
155971	Envelope surface glycoprotein gp120	920	CD4
155971	Envelope surface glycoprotein gp120	920	CD4
155971	Envelope surface glycoprotein gp120	920	CD4
155971	Envelope surface glycoprotein gp120	920	CD4
155971	Envelope surface glycoprotein gp120	920	CD4
155971	Envelope surface glycoprotein gp120	920	CD4
155971	Envelope surface glycoprotein gp120	920	CD4
155971	Envelope surface glycoprotein gp120	920	CD4
155971	Envelope surface glycoprotein gp120	920	CD4
155971	Envelope surface glycoprotein gp120	920	CD4
155971	Envelope surface glycoprotein gp120	920	CD4
155971	Envelope surface glycoprotein gp120	920	CD4
155971	Envelope surface glycoprotein gp120	920	CD4
155971	Envelope surface glycoprotein gp120	920	CD4
155971	Envelope surface glycoprotein gp120	920	CD4
155971	Envelope surface glycoprotein gp120	920	CD4
155971	Envelope surface glycoprotein gp120	920	CD4
155971	Envelope surface glycoprotein gp120	920	CD4
155971	Envelope surface glycoprotein gp120	920	CD4
155971	Envelope surface glycoprotein gp120	920	CD4
155971	Envelope surface glycoprotein gp120	920	CD4
155971	Envelope surface glycoprotein gp120	920	CD4
155971	Envelope surface glycoprotein gp120	920	CD4
155971	Envelope surface glycoprotein gp120	920	CD4
155971	Envelope surface glycoprotein gp120	920	CD4
155971	Envelope surface glycoprotein gp120	920	CD4
155971	Envelope surface glycoprotein gp120	920	CD4
155971	Envelope surface glycoprotein gp120	920	CD4
155971	Envelope surface glycoprotein gp120	920	CD4
155971	Envelope surface glycoprotein gp120	920	CD4
155971	Envelope surface glycoprotein gp120	920	CD4
155971	Envelope surface glycoprotein gp120	920	CD4
155971	Envelope surface glycoprotein gp120	920	CD4
155971	Envelope surface glycoprotein gp120	920	CD4
155971	Envelope surface glycoprotein gp120	920	CD4
155971	Envelope surface glycoprotein gp120	920	CD4
155971	Envelope surface glycoprotein gp120	920	CD4
155971	Envelope surface glycoprotein gp120	920	CD4
155971	Envelope surface glycoprotein gp120	920	CD4
155971	Envelope surface glycoprotein gp120	920	CD4
155971	Envelope surface glycoprotein gp120	920	CD4
155971	Envelope surface glycoprotein gp120	920	CD4
155971	Envelope surface glycoprotein gp120	920	CD4
155971	Envelope surface glycoprotein gp120	920	CD4
155971	Envelope surface glycoprotein gp120	920	CD4
155971	Envelope surface glycoprotein gp120	920	CD4
155971	Envelope surface glycoprotein gp120	920	CD4
155971	Envelope surface glycoprotein gp120	920	CD4
155971	Envelope surface glycoprotein gp120	920	CD4
155971	Envelope surface glycoprotein gp120	920	CD4
155971	Envelope surface glycoprotein gp120	920	CD4
155971	Envelope surface glycoprotein gp120	920	CD4
155971	Envelope surface glycoprotein gp120	920	CD4
155971	Envelope surface glycoprotein gp120	920	CD4
155971	Envelope surface glycoprotein gp120	920	CD4
155971	Envelope surface glycoprotein gp120	920	CD4
155971	Envelope surface glycoprotein gp120	920	CD4
155971	Envelope surface glycoprotein gp120	920	CD4
155971	Envelope surface glycoprotein gp120	920	CD4
155971	Envelope surface glycoprotein gp120	920	CD4
155971	Envelope surface glycoprotein gp120	920	CD4
155971	Envelope surface glycoprotein gp120	920	CD4
155971	Envelope surface glycoprotein gp120	920	CD4
155971	Envelope surface glycoprotein gp120	920	CD4
155971	Envelope surface glycoprotein gp120	920	CD4
155971	Envelope surface glycoprotein gp120	920	CD4
155971	Envelope surface glycoprotein gp120	3371	TNC
155971	Envelope surface glycoprotein gp120	3371	TNC
155971	Envelope surface glycoprotein gp120	7057	THBS1
155971	Envelope surface glycoprotein gp120	7057	THBS1
155971	Envelope surface glycoprotein gp120	7097	TLR2
155971	Envelope surface glycoprotein gp120	7099	TLR4
155971	Envelope surface glycoprotein gp120	10381	TUBB3
155971	Envelope surface glycoprotein gp120	920	CD4
155971	Envelope surface glycoprotein gp120	1509	CTSD
155971	Envelope surface glycoprotein gp120	1514	CTSL
155971	Envelope surface glycoprotein gp120	1515	CTSV
155971	Envelope surface glycoprotein gp120	1520	CTSS
155971	Envelope surface glycoprotein gp120	1803	DPP4
155971	Envelope surface glycoprotein gp120	64714	PDIA2
155971	Envelope surface glycoprotein gp120	2923	PDIA3
155971	Envelope surface glycoprotein gp120	9601	PDIA4
155971	Envelope surface glycoprotein gp120	10954	PDIA5
155971	Envelope surface glycoprotein gp120	10130	PDIA6
155971	Envelope surface glycoprotein gp120	5034	P4HB
155971	Envelope surface glycoprotein gp120	2147	F2
155971	Envelope surface glycoprotein gp120	7295	TXN
155971	Envelope surface glycoprotein gp120	5644	PRSS1
155971	Envelope surface glycoprotein gp120	5645	PRSS2
155971	Envelope surface glycoprotein gp120	5328	PLAU
155971	Envelope surface glycoprotein gp120	718	C3
155971	Envelope surface glycoprotein gp120	43	ACHE
155971	Envelope surface glycoprotein gp120	966	CD59
155971	Envelope surface glycoprotein gp120	966	CD59
155971	Envelope surface glycoprotein gp120	967	CD63
155971	Envelope surface glycoprotein gp120	1213	CLTC
155971	Envelope surface glycoprotein gp120	1211	CLTA
155971	Envelope surface glycoprotein gp120	1212	CLTB
155971	Envelope surface glycoprotein gp120	8411	EEA1
155971	Envelope surface glycoprotein gp120	5747	PTK2
155971	Envelope surface glycoprotein gp120	2803	GOLGA4
155971	Envelope surface glycoprotein gp120	2804	GOLGB1
155971	Envelope surface glycoprotein gp120	3916	LAMP1
155971	Envelope surface glycoprotein gp120	4133	MAP2
155971	Envelope surface glycoprotein gp120	64714	PDIA2
155971	Envelope surface glycoprotein gp120	2923	PDIA3
155971	Envelope surface glycoprotein gp120	6396	SEC13
155971	Envelope surface glycoprotein gp120	22872	SEC31A
155971	Envelope surface glycoprotein gp120	920	CD4
155971	Envelope surface glycoprotein gp120	5970	RELA
155971	Envelope surface glycoprotein gp120	5265	SERPINA1
155971	Envelope surface glycoprotein gp120	335	APOA1
155971	Envelope surface glycoprotein gp120	5708	PSMD2
155971	Envelope surface glycoprotein gp120	5706	PSMC6
155971	Envelope surface glycoprotein gp120	6187	RPS2
155971	Envelope surface glycoprotein gp120	6188	RPS3
155971	Envelope surface glycoprotein gp120	6191	RPS4X
155971	Envelope surface glycoprotein gp120	6194	RPS6
155971	Envelope surface glycoprotein gp120	6202	RPS8
155971	Envelope surface glycoprotein gp120	6203	RPS9
155971	Envelope surface glycoprotein gp120	3329	HSPD1
155971	Envelope surface glycoprotein gp120	6175	RPLP0
155971	Envelope surface glycoprotein gp120	6134	RPL10
155971	Envelope surface glycoprotein gp120	6137	RPL13
155971	Envelope surface glycoprotein gp120	9045	RPL14
155971	Envelope surface glycoprotein gp120	6139	RPL17
155971	Envelope surface glycoprotein gp120	6141	RPL18
155971	Envelope surface glycoprotein gp120	6143	RPL19
155971	Envelope surface glycoprotein gp120	6152	RPL24
155971	Envelope surface glycoprotein gp120	6159	RPL29
155971	Envelope surface glycoprotein gp120	6122	RPL3
155971	Envelope surface glycoprotein gp120	6124	RPL4
155971	Envelope surface glycoprotein gp120	6125	RPL5
155971	Envelope surface glycoprotein gp120	6128	RPL6
155971	Envelope surface glycoprotein gp120	6129	RPL7
155971	Envelope surface glycoprotein gp120	6130	RPL7A
155971	Envelope surface glycoprotein gp120	6132	RPL8
155971	Envelope surface glycoprotein gp120	6133	RPL9
155971	Envelope surface glycoprotein gp120	1717	DHCR7
155971	Envelope surface glycoprotein gp120	3309	HSPA5
155971	Envelope surface glycoprotein gp120	60	ACTB
155971	Envelope surface glycoprotein gp120	10093	ARPC4
155971	Envelope surface glycoprotein gp120	378	ARF4
155971	Envelope surface glycoprotein gp120	381	ARF5
155971	Envelope surface glycoprotein gp120	382	ARF6
155971	Envelope surface glycoprotein gp120	400	ARL1
155971	Envelope surface glycoprotein gp120	292	SLC25A5
155971	Envelope surface glycoprotein gp120	2023	ENO1
155971	Envelope surface glycoprotein gp120	9118	INA
155971	Envelope surface glycoprotein gp120	1173	AP2M1
155971	Envelope surface glycoprotein gp120	8943	AP3D1
155971	Envelope surface glycoprotein gp120	1176	AP3S1
155971	Envelope surface glycoprotein gp120	9131	AIFM1
155971	Envelope surface glycoprotein gp120	1615	DARS
155971	Envelope surface glycoprotein gp120	498	ATP5A1
155971	Envelope surface glycoprotein gp120	509	ATP5C1
155971	Envelope surface glycoprotein gp120	539	ATP5O
155971	Envelope surface glycoprotein gp120	47	ACLY
155971	Envelope surface glycoprotein gp120	1660	DHX9
155971	Envelope surface glycoprotein gp120	1653	DDX1
155971	Envelope surface glycoprotein gp120	1654	DDX3X
155971	Envelope surface glycoprotein gp120	2058	EPRS
155971	Envelope surface glycoprotein gp120	1234	CCR5
155971	Envelope surface glycoprotein gp120	1234	CCR5
155971	Envelope surface glycoprotein gp120	1234	CCR5
155971	Envelope surface glycoprotein gp120	1234	CCR5
155971	Envelope surface glycoprotein gp120	1234	CCR5
155971	Envelope surface glycoprotein gp120	1234	CCR5
155971	Envelope surface glycoprotein gp120	1234	CCR5
155971	Envelope surface glycoprotein gp120	7852	CXCR4
155971	Envelope surface glycoprotein gp120	7852	CXCR4
155971	Envelope surface glycoprotein gp120	7852	CXCR4
155971	Envelope surface glycoprotein gp120	7852	CXCR4
155971	Envelope surface glycoprotein gp120	790	CAD
155971	Envelope surface glycoprotein gp120	821	CANX
155971	Envelope surface glycoprotein gp120	4076	CAPRIN1
155971	Envelope surface glycoprotein gp120	30835	CD209
155971	Envelope surface glycoprotein gp120	10423	CDIPT
155971	Envelope surface glycoprotein gp120	988	CDC5L
155971	Envelope surface glycoprotein gp120	1213	CLTC
155971	Envelope surface glycoprotein gp120	29894	CPSF1
155971	Envelope surface glycoprotein gp120	11051	NUDT21
155971	Envelope surface glycoprotein gp120	79869	CPSF7
155971	Envelope surface glycoprotein gp120	1314	COPA
155971	Envelope surface glycoprotein gp120	22818	COPZ1
155971	Envelope surface glycoprotein gp120	8895	CPNE3
155971	Envelope surface glycoprotein gp120	5832	ALDH18A1
155971	Envelope surface glycoprotein gp120	4733	DRG1
155971	Envelope surface glycoprotein gp120	4176	MCM7
155971	Envelope surface glycoprotein gp120	5591	PRKDC
155971	Envelope surface glycoprotein gp120	1650	DDOST
155971	Envelope surface glycoprotein gp120	6184	RPN1
155971	Envelope surface glycoprotein gp120	6780	STAU1
155971	Envelope surface glycoprotein gp120	103	ADAR
155971	Envelope surface glycoprotein gp120	1785	DNM2
155971	Envelope surface glycoprotein gp120	56254	RNF20
155971	Envelope surface glycoprotein gp120	1994	ELAVL1
155971	Envelope surface glycoprotein gp120	2109	ETFB
155971	Envelope surface glycoprotein gp120	1915	EEF1A1
155971	Envelope surface glycoprotein gp120	1936	EEF1D
155971	Envelope surface glycoprotein gp120	1937	EEF1G
155971	Envelope surface glycoprotein gp120	1973	EIF4A1
155971	Envelope surface glycoprotein gp120	9775	EIF4A3
155971	Envelope surface glycoprotein gp120	8661	EIF3A
155971	Envelope surface glycoprotein gp120	8664	EIF3D
155971	Envelope surface glycoprotein gp120	3646	EIF3E
155971	Envelope surface glycoprotein gp120	8570	KHSRP
155971	Envelope surface glycoprotein gp120	2194	FASN
155971	Envelope surface glycoprotein gp120	2316	FLNA
155971	Envelope surface glycoprotein gp120	2597	GAPDH
155971	Envelope surface glycoprotein gp120	5836	PYGL
155971	Envelope surface glycoprotein gp120	5901	RAN
155971	Envelope surface glycoprotein gp120	2770	GNAI1
155971	Envelope surface glycoprotein gp120	2771	GNAI2
155971	Envelope surface glycoprotein gp120	2773	GNAI3
155971	Envelope surface glycoprotein gp120	3305	HSPA1L
155971	Envelope surface glycoprotein gp120	3303	HSPA1A
155971	Envelope surface glycoprotein gp120	3304	HSPA1B
155971	Envelope surface glycoprotein gp120	3312	HSPA8
155971	Envelope surface glycoprotein gp120	3182	HNRNPAB
155971	Envelope surface glycoprotein gp120	10949	HNRNPA0
155971	Envelope surface glycoprotein gp120	3178	HNRNPA1
155971	Envelope surface glycoprotein gp120	220988	HNRNPA3
155971	Envelope surface glycoprotein gp120	3184	HNRNPD
155971	Envelope surface glycoprotein gp120	3185	HNRNPF
155971	Envelope surface glycoprotein gp120	3187	HNRNPH1
155971	Envelope surface glycoprotein gp120	3188	HNRNPH2
155971	Envelope surface glycoprotein gp120	3189	HNRNPH3
155971	Envelope surface glycoprotein gp120	3190	HNRNPK
155971	Envelope surface glycoprotein gp120	4670	HNRNPM
155971	Envelope surface glycoprotein gp120	10492	SYNCRIP
155971	Envelope surface glycoprotein gp120	10236	HNRNPR
155971	Envelope surface glycoprotein gp120	3192	HNRNPU
155971	Envelope surface glycoprotein gp120	3181	HNRNPA2B1
155971	Envelope surface glycoprotein gp120	3183	HNRNPC
155971	Envelope surface glycoprotein gp120	3105	HLA-A
155971	Envelope surface glycoprotein gp120	3133	HLA-E
155971	Envelope surface glycoprotein gp120	3134	HLA-F
155971	Envelope surface glycoprotein gp120	3135	HLA-G
155971	Envelope surface glycoprotein gp120	3107	HLA-C
155971	Envelope surface glycoprotein gp120	3837	KPNB1
155971	Envelope surface glycoprotein gp120	10527	IPO7
155971	Envelope surface glycoprotein gp120	10642	IGF2BP1
155971	Envelope surface glycoprotein gp120	10643	IGF2BP3
155971	Envelope surface glycoprotein gp120	3676	ITGA4
155971	Envelope surface glycoprotein gp120	3676	ITGA4
155971	Envelope surface glycoprotein gp120	3695	ITGB7
155971	Envelope surface glycoprotein gp120	3695	ITGB7
155971	Envelope surface glycoprotein gp120	3608	ILF2
155971	Envelope surface glycoprotein gp120	3609	ILF3
155971	Envelope surface glycoprotein gp120	3419	IDH3A
155971	Envelope surface glycoprotein gp120	3376	IARS
155971	Envelope surface glycoprotein gp120	11103	KRR1
155971	Envelope surface glycoprotein gp120	3939	LDHA
155971	Envelope surface glycoprotein gp120	3945	LDHB
155971	Envelope surface glycoprotein gp120	51520	LARS
155971	Envelope surface glycoprotein gp120	10128	LRPPRC
155971	Envelope surface glycoprotein gp120	55379	LRRC59
155971	Envelope surface glycoprotein gp120	2181	ACSL3
155971	Envelope surface glycoprotein gp120	4069	LYZ
155971	Envelope surface glycoprotein gp120	3106	HLA-B
155971	Envelope surface glycoprotein gp120	4153	MBL2
155971	Envelope surface glycoprotein gp120	4153	MBL2
155971	Envelope surface glycoprotein gp120	4153	MBL2
155971	Envelope surface glycoprotein gp120	7841	MOGS
155971	Envelope surface glycoprotein gp120	9782	MATR3
155971	Envelope surface glycoprotein gp120	8402	SLC25A11
155971	Envelope surface glycoprotein gp120	10514	MYBBP1A
155971	Envelope surface glycoprotein gp120	55922	NKRF
155971	Envelope surface glycoprotein gp120	4841	NONO
155971	Envelope surface glycoprotein gp120	9631	NUP155
155971	Envelope surface glycoprotein gp120	4904	YBX1
155971	Envelope surface glycoprotein gp120	9188	DDX21
155971	Envelope surface glycoprotein gp120	4691	NCL
155971	Envelope surface glycoprotein gp120	4869	NPM1
155971	Envelope surface glycoprotein gp120	4942	OAT
155971	Envelope surface glycoprotein gp120	55037	PTCD3
155971	Envelope surface glycoprotein gp120	9588	PRDX6
155971	Envelope surface glycoprotein gp120	3295	HSD17B4
155971	Envelope surface glycoprotein gp120	9791	PTDSS1
155971	Envelope surface glycoprotein gp120	5358	PLS3
155971	Envelope surface glycoprotein gp120	5093	PCBP1
155971	Envelope surface glycoprotein gp120	26986	PABPC1
155971	Envelope surface glycoprotein gp120	8106	PABPN1
155971	Envelope surface glycoprotein gp120	8761	PABPC4
155971	Envelope surface glycoprotein gp120	81608	FIP1L1
155971	Envelope surface glycoprotein gp120	55660	PRPF40A
155971	Envelope surface glycoprotein gp120	10594	PRPF8
155971	Envelope surface glycoprotein gp120	1665	DHX15
155971	Envelope surface glycoprotein gp120	10521	DDX17
155971	Envelope surface glycoprotein gp120	9416	DDX23
155971	Envelope surface glycoprotein gp120	55661	DDX27
155971	Envelope surface glycoprotein gp120	1655	DDX5
155971	Envelope surface glycoprotein gp120	5245	PHB
155971	Envelope surface glycoprotein gp120	11331	PHB2
155971	Envelope surface glycoprotein gp120	29927	SEC61A1
155971	Envelope surface glycoprotein gp120	22907	DHX30
155971	Envelope surface glycoprotein gp120	4343	MOV10
155971	Envelope surface glycoprotein gp120	51631	LUC7L2
155971	Envelope surface glycoprotein gp120	5162	PDHB
155971	Envelope surface glycoprotein gp120	5315	PKM
155971	Envelope surface glycoprotein gp120	8826	IQGAP1
155971	Envelope surface glycoprotein gp120	10670	RRAGA
155971	Envelope surface glycoprotein gp120	10890	RAB10
155971	Envelope surface glycoprotein gp120	5878	RAB5C
155971	Envelope surface glycoprotein gp120	4218	RAB8A
155971	Envelope surface glycoprotein gp120	10399	RACK1
155971	Envelope surface glycoprotein gp120	5976	UPF1
155971	Envelope surface glycoprotein gp120	65109	UPF3B
155971	Envelope surface glycoprotein gp120	125950	RAVER1
155971	Envelope surface glycoprotein gp120	27316	RBMX
155971	Envelope surface glycoprotein gp120	6294	SAFB
155971	Envelope surface glycoprotein gp120	6426	SRSF1
155971	Envelope surface glycoprotein gp120	10772	SRSF10
155971	Envelope surface glycoprotein gp120	6429	SRSF4
155971	Envelope surface glycoprotein gp120	6432	SRSF7
155971	Envelope surface glycoprotein gp120	871	SERPINH1
155971	Envelope surface glycoprotein gp120	94081	SFXN1
155971	Envelope surface glycoprotein gp120	58477	SRPRB
155971	Envelope surface glycoprotein gp120	6730	SRP68
155971	Envelope surface glycoprotein gp120	6731	SRP72
155971	Envelope surface glycoprotein gp120	476	ATP1A1
155971	Envelope surface glycoprotein gp120	6709	SPTAN1
155971	Envelope surface glycoprotein gp120	7919	DDX39B
155971	Envelope surface glycoprotein gp120	23451	SF3B1
155971	Envelope surface glycoprotein gp120	10992	SF3B2
155971	Envelope surface glycoprotein gp120	10262	SF3B4
155971	Envelope surface glycoprotein gp120	6421	SFPQ
155971	Envelope surface glycoprotein gp120	3313	HSPA9
155971	Envelope surface glycoprotein gp120	8243	SMC1A
155971	Envelope surface glycoprotein gp120	920	CD4
155971	Envelope surface glycoprotein gp120	920	CD4
155971	Envelope surface glycoprotein gp120	920	CD4
155971	Envelope surface glycoprotein gp120	920	CD4
155971	Envelope surface glycoprotein gp120	920	CD4
155971	Envelope surface glycoprotein gp120	920	CD4
155971	Envelope surface glycoprotein gp120	920	CD4
155971	Envelope surface glycoprotein gp120	920	CD4
155971	Envelope surface glycoprotein gp120	6950	TCP1
155971	Envelope surface glycoprotein gp120	10576	CCT2
155971	Envelope surface glycoprotein gp120	10575	CCT4
155971	Envelope surface glycoprotein gp120	23435	TARDBP
155971	Envelope surface glycoprotein gp120	57187	THOC2
155971	Envelope surface glycoprotein gp120	10189	ALYREF
155971	Envelope surface glycoprotein gp120	10155	TRIM28
155971	Envelope surface glycoprotein gp120	7846	TUBA1A
155971	Envelope surface glycoprotein gp120	7277	TUBA4A
155971	Envelope surface glycoprotein gp120	9092	SART1
155971	Envelope surface glycoprotein gp120	23020	SNRNP200
155971	Envelope surface glycoprotein gp120	9114	ATP6V0D1
155971	Envelope surface glycoprotein gp120	51495	HACD3
155971	Envelope surface glycoprotein gp120	4905	NSF
155971	Envelope surface glycoprotein gp120	7431	VIM
155971	Envelope surface glycoprotein gp120	51663	ZFR
155971	Envelope surface glycoprotein gp120	10096	ACTR3
155971	Envelope surface glycoprotein gp120	10458	BAIAP2
155971	Envelope surface glycoprotein gp120	6348	CCL3
155971	Envelope surface glycoprotein gp120	2555	GABRA2
155971	Envelope surface glycoprotein gp120	3586	IL10
155971	Envelope surface glycoprotein gp120	3565	IL4
155971	Envelope surface glycoprotein gp120	4261	CIITA
155971	Envelope surface glycoprotein gp120	5599	MAPK8
155971	Envelope surface glycoprotein gp120	5599	MAPK8
155971	Envelope surface glycoprotein gp120	1139	CHRNA7
155971	Envelope surface glycoprotein gp120	4790	NFKB1
155971	Envelope surface glycoprotein gp120	5728	PTEN
155971	Envelope surface glycoprotein gp120	207	AKT1
155971	Envelope surface glycoprotein gp120	920	CD4
155971	Envelope surface glycoprotein gp120	7158	TP53BP1
155971	Envelope surface glycoprotein gp120	7124	TNF
155971	Envelope surface glycoprotein gp120	7124	TNF
155971	Envelope surface glycoprotein gp120	10673	TNFSF13B
155971	Envelope surface glycoprotein gp120	25	ABL1
155971	Envelope surface glycoprotein gp120	3932	LCK
155971	Envelope surface glycoprotein gp120	10163	WASF2
155971	Envelope surface glycoprotein gp120	3576	CXCL8
155971	Envelope surface glycoprotein gp120	8878	SQSTM1
155971	Envelope surface glycoprotein gp120	2670	GFAP
155971	Envelope surface glycoprotein gp120	5594	MAPK1
155971	Envelope surface glycoprotein gp120	5602	MAPK10
155971	Envelope surface glycoprotein gp120	5599	MAPK8
155971	Envelope surface glycoprotein gp120	5601	MAPK9
155971	Envelope surface glycoprotein gp120	3745	KCNB1
155971	Envelope surface glycoprotein gp120	3745	KCNB1
155971	Envelope surface glycoprotein gp120	207	AKT1
155971	Envelope surface glycoprotein gp120	208	AKT2
155971	Envelope surface glycoprotein gp120	10000	AKT3
155971	Envelope surface glycoprotein gp120	5925	RB1
155971	Envelope surface glycoprotein gp120	7431	VIM
155971	Envelope surface glycoprotein gp120	7421	VDR
155971	Envelope surface glycoprotein gp120	8399	PLA2G10
155971	Envelope surface glycoprotein gp120	3551	IKBKB
155971	Envelope surface glycoprotein gp120	4792	NFKBIA
155971	Envelope surface glycoprotein gp120	7082	TJP1
155971	Envelope surface glycoprotein gp120	54941	RNF125
155971	Envelope surface glycoprotein gp120	920	CD4
155971	Envelope surface glycoprotein gp120	7531	YWHAE
155971	Envelope surface glycoprotein gp120	4938	OAS1
155971	Envelope surface glycoprotein gp120	4940	OAS3
155971	Envelope surface glycoprotein gp120	952	CD38
155971	Envelope surface glycoprotein gp120	250	ALPP
155971	Envelope surface glycoprotein gp120	249	ALPL
155971	Envelope surface glycoprotein gp120	249	ALPL
155971	Envelope surface glycoprotein gp120	301	ANXA1
155971	Envelope surface glycoprotein gp120	912	CD1D
155971	Envelope surface glycoprotein gp120	596	BCL2
155971	Envelope surface glycoprotein gp120	596	BCL2
155971	Envelope surface glycoprotein gp120	596	BCL2
155971	Envelope surface glycoprotein gp120	240	ALOX5
155971	Envelope surface glycoprotein gp120	151888	BTLA
155971	Envelope surface glycoprotein gp120	974	CD79B
155971	Envelope surface glycoprotein gp120	974	CD79B
155971	Envelope surface glycoprotein gp120	931	MS4A1
155971	Envelope surface glycoprotein gp120	931	MS4A1
155971	Envelope surface glycoprotein gp120	598	BCL2L1
155971	Envelope surface glycoprotein gp120	664	BNIP3
155971	Envelope surface glycoprotein gp120	4915	NTRK2
155971	Envelope surface glycoprotein gp120	654	BMP6
155971	Envelope surface glycoprotein gp120	655	BMP7
155971	Envelope surface glycoprotein gp120	657	BMPR1A
155971	Envelope surface glycoprotein gp120	658	BMPR1B
155971	Envelope surface glycoprotein gp120	659	BMPR2
155971	Envelope surface glycoprotein gp120	1234	CCR5
155971	Envelope surface glycoprotein gp120	1234	CCR5
155971	Envelope surface glycoprotein gp120	1236	CCR7
155971	Envelope surface glycoprotein gp120	6348	CCL3
155971	Envelope surface glycoprotein gp120	6351	CCL4
155971	Envelope surface glycoprotein gp120	6352	CCL5
155971	Envelope surface glycoprotein gp120	7852	CXCR4
155971	Envelope surface glycoprotein gp120	7852	CXCR4
155971	Envelope surface glycoprotein gp120	7852	CXCR4
155971	Envelope surface glycoprotein gp120	3627	CXCL10
155971	Envelope surface glycoprotein gp120	728	C5AR1
155971	Envelope surface glycoprotein gp120	1268	CNR1
155971	Envelope surface glycoprotein gp120	8837	CFLAR
155971	Envelope surface glycoprotein gp120	841	CASP8
155971	Envelope surface glycoprotein gp120	1499	CTNNB1
155971	Envelope surface glycoprotein gp120	1508	CTSB
155971	Envelope surface glycoprotein gp120	977	CD151
155971	Envelope surface glycoprotein gp120	30835	CD209
155971	Envelope surface glycoprotein gp120	9308	CD83
155971	Envelope surface glycoprotein gp120	9308	CD83
155971	Envelope surface glycoprotein gp120	51652	CHMP3
155971	Envelope surface glycoprotein gp120	89832	CHRFAM7A
155971	Envelope surface glycoprotein gp120	9076	CLDN1
155971	Envelope surface glycoprotein gp120	9075	CLDN2
155971	Envelope surface glycoprotein gp120	1365	CLDN3
155971	Envelope surface glycoprotein gp120	1364	CLDN4
155971	Envelope surface glycoprotein gp120	7122	CLDN5
155971	Envelope surface glycoprotein gp120	7122	CLDN5
155971	Envelope surface glycoprotein gp120	7122	CLDN5
155971	Envelope surface glycoprotein gp120	1378	CR1
155971	Envelope surface glycoprotein gp120	10800	CYSLTR1
155971	Envelope surface glycoprotein gp120	3561	IL2RG
155971	Envelope surface glycoprotein gp120	3561	IL2RG
155971	Envelope surface glycoprotein gp120	1154	CISH
155971	Envelope surface glycoprotein gp120	8440	NCK2
155971	Envelope surface glycoprotein gp120	64180	DPEP3
155971	Envelope surface glycoprotein gp120	1742	DLG4
155971	Envelope surface glycoprotein gp120	1742	DLG4
155971	Envelope surface glycoprotein gp120	868	CBLB
155971	Envelope surface glycoprotein gp120	220972	2021-03-08
155971	Envelope surface glycoprotein gp120	10346	TRIM22
155971	Envelope surface glycoprotein gp120	969	CD69
155971	Envelope surface glycoprotein gp120	5168	ENPP2
155971	Envelope surface glycoprotein gp120	8880	FUBP1
155971	Envelope surface glycoprotein gp120	2357	FPR1
155971	Envelope surface glycoprotein gp120	898	CCNE1
155971	Envelope surface glycoprotein gp120	3959	LGALS3BP
155971	Envelope surface glycoprotein gp120	2670	GFAP
155971	Envelope surface glycoprotein gp120	2902	GRIN1
155971	Envelope surface glycoprotein gp120	2903	GRIN2A
155971	Envelope surface glycoprotein gp120	2904	GRIN2B
155971	Envelope surface glycoprotein gp120	2905	GRIN2C
155971	Envelope surface glycoprotein gp120	2906	GRIN2D
155971	Envelope surface glycoprotein gp120	116443	GRIN3A
155971	Envelope surface glycoprotein gp120	116444	GRIN3B
155971	Envelope surface glycoprotein gp120	2752	GLUL
155971	Envelope surface glycoprotein gp120	2993	GYPA
155971	Envelope surface glycoprotein gp120	2633	GBP1
155971	Envelope surface glycoprotein gp120	4914	NTRK1
155971	Envelope surface glycoprotein gp120	3112	HLA-DOB
155971	Envelope surface glycoprotein gp120	3122	HLA-DRA
155971	Envelope surface glycoprotein gp120	3439	IFNA1
155971	Envelope surface glycoprotein gp120	3439	IFNA1
155971	Envelope surface glycoprotein gp120	3447	IFNA13
155971	Envelope surface glycoprotein gp120	3446	IFNA10
155971	Envelope surface glycoprotein gp120	3448	IFNA14
155971	Envelope surface glycoprotein gp120	3449	IFNA16
155971	Envelope surface glycoprotein gp120	3449	IFNA16
155971	Envelope surface glycoprotein gp120	3451	IFNA17
155971	Envelope surface glycoprotein gp120	3440	IFNA2
155971	Envelope surface glycoprotein gp120	3440	IFNA2
155971	Envelope surface glycoprotein gp120	3452	IFNA21
155971	Envelope surface glycoprotein gp120	3441	IFNA4
155971	Envelope surface glycoprotein gp120	3442	IFNA5
155971	Envelope surface glycoprotein gp120	3443	IFNA6
155971	Envelope surface glycoprotein gp120	3444	IFNA7
155971	Envelope surface glycoprotein gp120	3444	IFNA7
155971	Envelope surface glycoprotein gp120	3445	IFNA8
155971	Envelope surface glycoprotein gp120	2537	IFI6
155971	Envelope surface glycoprotein gp120	3458	IFNG
155971	Envelope surface glycoprotein gp120	3458	IFNG
155971	Envelope surface glycoprotein gp120	3458	IFNG
155971	Envelope surface glycoprotein gp120	3458	IFNG
155971	Envelope surface glycoprotein gp120	10964	IFI44L
155971	Envelope surface glycoprotein gp120	3592	IL12A
155971	Envelope surface glycoprotein gp120	3592	IL12A
155971	Envelope surface glycoprotein gp120	3593	IL12B
155971	Envelope surface glycoprotein gp120	3593	IL12B
155971	Envelope surface glycoprotein gp120	3601	IL15RA
155971	Envelope surface glycoprotein gp120	8809	IL18R1
155971	Envelope surface glycoprotein gp120	3558	IL2
155971	Envelope surface glycoprotein gp120	3558	IL2
155971	Envelope surface glycoprotein gp120	3558	IL2
155971	Envelope surface glycoprotein gp120	3558	IL2
155971	Envelope surface glycoprotein gp120	3559	IL2RA
155971	Envelope surface glycoprotein gp120	3559	IL2RA
155971	Envelope surface glycoprotein gp120	3560	IL2RB
155971	Envelope surface glycoprotein gp120	3560	IL2RB
155971	Envelope surface glycoprotein gp120	3565	IL4
155971	Envelope surface glycoprotein gp120	3569	IL6
155971	Envelope surface glycoprotein gp120	3569	IL6
155971	Envelope surface glycoprotein gp120	248	ALPI
155971	Envelope surface glycoprotein gp120	50848	F11R
155971	Envelope surface glycoprotein gp120	9622	KLK4
155971	Envelope surface glycoprotein gp120	6402	SELL
155971	Envelope surface glycoprotein gp120	6402	SELL
155971	Envelope surface glycoprotein gp120	10859	LILRB1
155971	Envelope surface glycoprotein gp120	6693	SPN
155971	Envelope surface glycoprotein gp120	2208	FCER2
155971	Envelope surface glycoprotein gp120	2214	FCGR3A
155971	Envelope surface glycoprotein gp120	27074	LAMP3
155971	Envelope surface glycoprotein gp120	3123	HLA-DRB1
155971	Envelope surface glycoprotein gp120	51024	FIS1
155971	Envelope surface glycoprotein gp120	5243	ABCB1
155971	Envelope surface glycoprotein gp120	4609	MYC
155971	Envelope surface glycoprotein gp120	4666	NACA
155971	Envelope surface glycoprotein gp120	9437	NCR1
155971	Envelope surface glycoprotein gp120	259197	NCR3
155971	Envelope surface glycoprotein gp120	4826	NNAT
155971	Envelope surface glycoprotein gp120	4688	NCF2
155971	Envelope surface glycoprotein gp120	4846	NOS3
155971	Envelope surface glycoprotein gp120	4916	NTRK3
155971	Envelope surface glycoprotein gp120	6672	SP100
155971	Envelope surface glycoprotein gp120	4691	NCL
155971	Envelope surface glycoprotein gp120	100506658	OCLN
155971	Envelope surface glycoprotein gp120	100506658	OCLN
155971	Envelope surface glycoprotein gp120	100506658	OCLN
155971	Envelope surface glycoprotein gp120	5468	PPARG
155971	Envelope surface glycoprotein gp120	3936	LCP1
155971	Envelope surface glycoprotein gp120	7941	PLA2G7
155971	Envelope surface glycoprotein gp120	5578	PRKCA
155971	Envelope surface glycoprotein gp120	4149	MAX
155971	Envelope surface glycoprotein gp120	5923	RASGRF1
155971	Envelope surface glycoprotein gp120	5788	PTPRC
155971	Envelope surface glycoprotein gp120	6039	RNASE6
155971	Envelope surface glycoprotein gp120	860	RUNX2
155971	Envelope surface glycoprotein gp120	10603	SH2B2
155971	Envelope surface glycoprotein gp120	6726	SRP9
155971	Envelope surface glycoprotein gp120	6775	STAT4
155971	Envelope surface glycoprotein gp120	6776	STAT5A
155971	Envelope surface glycoprotein gp120	6777	STAT5B
155971	Envelope surface glycoprotein gp120	6531	SLC6A3
155971	Envelope surface glycoprotein gp120	8631	SKAP1
155971	Envelope surface glycoprotein gp120	920	CD4
155971	Envelope surface glycoprotein gp120	920	CD4
155971	Envelope surface glycoprotein gp120	920	CD4
155971	Envelope surface glycoprotein gp120	920	CD4
155971	Envelope surface glycoprotein gp120	920	CD4
155971	Envelope surface glycoprotein gp120	941	CD80
155971	Envelope surface glycoprotein gp120	942	CD86
155971	Envelope surface glycoprotein gp120	4063	LY9
155971	Envelope surface glycoprotein gp120	7015	TERT
155971	Envelope surface glycoprotein gp120	7082	TJP1
155971	Envelope surface glycoprotein gp120	7082	TJP1
155971	Envelope surface glycoprotein gp120	7082	TJP1
155971	Envelope surface glycoprotein gp120	7082	TJP1
155971	Envelope surface glycoprotein gp120	9414	TJP2
155971	Envelope surface glycoprotein gp120	54106	TLR9
155971	Envelope surface glycoprotein gp120	6934	TCF7L2
155971	Envelope surface glycoprotein gp120	3725	JUN
155971	Envelope surface glycoprotein gp120	7037	TFRC
155971	Envelope surface glycoprotein gp120	23087	TRIM35
155971	Envelope surface glycoprotein gp120	7124	TNF
155971	Envelope surface glycoprotein gp120	7124	TNF
155971	Envelope surface glycoprotein gp120	8600	TNFSF11
155971	Envelope surface glycoprotein gp120	8797	TNFRSF10A
155971	Envelope surface glycoprotein gp120	8794	TNFRSF10C
155971	Envelope surface glycoprotein gp120	8793	TNFRSF10D
155971	Envelope surface glycoprotein gp120	958	CD40
155971	Envelope surface glycoprotein gp120	2268	FGR
155971	Envelope surface glycoprotein gp120	3055	HCK
155971	Envelope surface glycoprotein gp120	3718	JAK3
155971	Envelope surface glycoprotein gp120	2321	FLT1
155971	Envelope surface glycoprotein gp120	3791	KDR
155971	Envelope surface glycoprotein gp120	7450	VWF
155971	Envelope surface glycoprotein gp120	6347	CCL2
155971	Envelope surface glycoprotein gp120	30835	CD209
155971	Envelope surface glycoprotein gp120	967	CD63
155971	Envelope surface glycoprotein gp120	2745	GLRX
155971	Envelope surface glycoprotein gp120	2033	EP300
155971	Envelope surface glycoprotein gp120	3439	IFNA1
155971	Envelope surface glycoprotein gp120	3447	IFNA13
155971	Envelope surface glycoprotein gp120	3446	IFNA10
155971	Envelope surface glycoprotein gp120	3448	IFNA14
155971	Envelope surface glycoprotein gp120	3449	IFNA16
155971	Envelope surface glycoprotein gp120	3451	IFNA17
155971	Envelope surface glycoprotein gp120	3440	IFNA2
155971	Envelope surface glycoprotein gp120	3452	IFNA21
155971	Envelope surface glycoprotein gp120	3441	IFNA4
155971	Envelope surface glycoprotein gp120	3442	IFNA5
155971	Envelope surface glycoprotein gp120	3443	IFNA6
155971	Envelope surface glycoprotein gp120	3444	IFNA7
155971	Envelope surface glycoprotein gp120	3445	IFNA8
155971	Envelope surface glycoprotein gp120	3558	IL2
155971	Envelope surface glycoprotein gp120	166929	SGMS2
155971	Envelope surface glycoprotein gp120	6441	SFTPD
155971	Envelope surface glycoprotein gp120	5879	RAC1
155971	Envelope surface glycoprotein gp120	54538	ROBO4
155971	Envelope surface glycoprotein gp120	920	CD4
155971	Envelope surface glycoprotein gp120	920	CD4
155971	Envelope surface glycoprotein gp120	920	CD4
155971	Envelope surface glycoprotein gp120	7295	TXN
155971	Envelope surface glycoprotein gp120	387	RHOA
155971	Envelope surface glycoprotein gp120	2534	FYN
155971	Envelope surface glycoprotein gp120	10109	ARPC2
155971	Envelope surface glycoprotein gp120	1236	CCR7
155971	Envelope surface glycoprotein gp120	6347	CCL2
155971	Envelope surface glycoprotein gp120	6366	CCL21
155971	Envelope surface glycoprotein gp120	7852	CXCR4
155971	Envelope surface glycoprotein gp120	3738	KCNA3
155971	Envelope surface glycoprotein gp120	54538	ROBO4
155971	Envelope surface glycoprotein gp120	920	CD4
155971	Envelope surface glycoprotein gp120	7040	TGFB1
155971	Envelope surface glycoprotein gp120	7124	TNF
155971	Envelope surface glycoprotein gp120	7124	TNF
155971	Envelope surface glycoprotein gp120	7454	WAS
155971	Envelope surface glycoprotein gp120	9730	DCAF1
155971	Envelope surface glycoprotein gp120	57733	GBA3
155971	Envelope surface glycoprotein gp120	2548	GAA
155971	Envelope surface glycoprotein gp120	7841	MOGS
155971	Envelope surface glycoprotein gp120	23193	GANAB
155971	Envelope surface glycoprotein gp120	2595	GANC
155971	Envelope surface glycoprotein gp120	57704	GBA2
155971	Envelope surface glycoprotein gp120	920	CD4
155971	Envelope surface glycoprotein gp120	23236	PLCB1
155971	Envelope surface glycoprotein gp120	5330	PLCB2
155971	Envelope surface glycoprotein gp120	5331	PLCB3
155971	Envelope surface glycoprotein gp120	5332	PLCB4
155971	Envelope surface glycoprotein gp120	5333	PLCD1
155971	Envelope surface glycoprotein gp120	113026	PLCD3
155971	Envelope surface glycoprotein gp120	84812	PLCD4
155971	Envelope surface glycoprotein gp120	51196	PLCE1
155971	Envelope surface glycoprotein gp120	23007	PLCH1
155971	Envelope surface glycoprotein gp120	9651	PLCH2
155971	Envelope surface glycoprotein gp120	5335	PLCG1
155971	Envelope surface glycoprotein gp120	5336	PLCG2
155971	Envelope surface glycoprotein gp120	89869	PLCZ1
155971	Envelope surface glycoprotein gp120	5566	PRKACA
155971	Envelope surface glycoprotein gp120	5567	PRKACB
155971	Envelope surface glycoprotein gp120	5568	PRKACG
155971	Envelope surface glycoprotein gp120	5573	PRKAR1A
155971	Envelope surface glycoprotein gp120	5576	PRKAR2A
155971	Envelope surface glycoprotein gp120	995	CDC25C
155971	Envelope surface glycoprotein gp120	9261	MAPKAPK2
155971	Envelope surface glycoprotein gp120	1432	MAPK14
155971	Envelope surface glycoprotein gp120	171558	PTCRA
155971	Envelope surface glycoprotein gp120	975	CD81
155971	Envelope surface glycoprotein gp120	3383	ICAM1
155971	Envelope surface glycoprotein gp120	8678	BECN1
155971	Envelope surface glycoprotein gp120	84557	MAP1LC3A
155971	Envelope surface glycoprotein gp120	3439	IFNA1
155971	Envelope surface glycoprotein gp120	7157	TP53
155971	Envelope surface glycoprotein gp120	5625	PRODH
155971	Envelope surface glycoprotein gp120	7099	TLR4
155971	Envelope surface glycoprotein gp120	7040	TGFB1
155971	Envelope surface glycoprotein gp120	983	CDK1
155971	Envelope surface glycoprotein gp120	891	CCNB1
155971	Envelope surface glycoprotein gp120	7846	TUBA1A
155971	Envelope surface glycoprotein gp120	10376	TUBA1B
155971	Envelope surface glycoprotein gp120	84790	TUBA1C
155971	Envelope surface glycoprotein gp120	7278	TUBA3C
155971	Envelope surface glycoprotein gp120	7277	TUBA4A
155971	Envelope surface glycoprotein gp120	51807	TUBA8
155971	Envelope surface glycoprotein gp120	637	BID
155971	Envelope surface glycoprotein gp120	836	CASP3
155971	Envelope surface glycoprotein gp120	6403	SELP
155971	Envelope surface glycoprotein gp120	142	PARP1
155971	Envelope surface glycoprotein gp120	7852	CXCR4
155971	Envelope surface glycoprotein gp120	7157	TP53
155971	Envelope surface glycoprotein gp120	7157	TP53
155971	Envelope surface glycoprotein gp120	1072	CFL1
155971	Envelope surface glycoprotein gp120	1072	CFL1
155971	Envelope surface glycoprotein gp120	1073	CFL2
155971	Envelope surface glycoprotein gp120	7430	EZR
155971	Envelope surface glycoprotein gp120	7430	EZR
155971	Envelope surface glycoprotein gp120	2335	FN1
155971	Envelope surface glycoprotein gp120	5747	PTK2
155971	Envelope surface glycoprotein gp120	3661	IRF3
155971	Envelope surface glycoprotein gp120	3984	LIMK1
155971	Envelope surface glycoprotein gp120	5594	MAPK1
155971	Envelope surface glycoprotein gp120	5594	MAPK1
155971	Envelope surface glycoprotein gp120	5602	MAPK10
155971	Envelope surface glycoprotein gp120	1432	MAPK14
155971	Envelope surface glycoprotein gp120	1432	MAPK14
155971	Envelope surface glycoprotein gp120	5595	MAPK3
155971	Envelope surface glycoprotein gp120	5599	MAPK8
155971	Envelope surface glycoprotein gp120	5599	MAPK8
155971	Envelope surface glycoprotein gp120	5601	MAPK9
155971	Envelope surface glycoprotein gp120	4478	MSN
155971	Envelope surface glycoprotein gp120	4087	SMAD2
155971	Envelope surface glycoprotein gp120	4792	NFKBIA
155971	Envelope surface glycoprotein gp120	4792	NFKBIA
155971	Envelope surface glycoprotein gp120	5295	PIK3R1
155971	Envelope surface glycoprotein gp120	5296	PIK3R2
155971	Envelope surface glycoprotein gp120	2185	PTK2B
155971	Envelope surface glycoprotein gp120	2185	PTK2B
155971	Envelope surface glycoprotein gp120	6714	SRC
155971	Envelope surface glycoprotein gp120	5879	RAC1
155971	Envelope surface glycoprotein gp120	5062	PAK2
155971	Envelope surface glycoprotein gp120	919	CD247
155971	Envelope surface glycoprotein gp120	920	CD4
155971	Envelope surface glycoprotein gp120	5970	RELA
155971	Envelope surface glycoprotein gp120	3932	LCK
155971	Envelope surface glycoprotein gp120	10163	WASF2
155971	Envelope surface glycoprotein gp120	10163	WASF2
155971	Envelope surface glycoprotein gp120	58	ACTA1
155971	Envelope surface glycoprotein gp120	1234	CCR5
155971	Envelope surface glycoprotein gp120	7852	CXCR4
155971	Envelope surface glycoprotein gp120	3383	ICAM1
155971	Envelope surface glycoprotein gp120	920	CD4
155971	Envelope surface glycoprotein gp120	6347	CCL2
155971	Envelope surface glycoprotein gp120	6347	CCL2
155971	Envelope surface glycoprotein gp120	6348	CCL3
155971	Envelope surface glycoprotein gp120	6348	CCL3
155971	Envelope surface glycoprotein gp120	6351	CCL4
155971	Envelope surface glycoprotein gp120	6351	CCL4
155971	Envelope surface glycoprotein gp120	6352	CCL5
155971	Envelope surface glycoprotein gp120	54205	CYCS
155971	Envelope surface glycoprotein gp120	54205	CYCS
155971	Envelope surface glycoprotein gp120	1906	EDN1
155971	Envelope surface glycoprotein gp120	1437	CSF2
155971	Envelope surface glycoprotein gp120	3620	IDO1
155971	Envelope surface glycoprotein gp120	3458	IFNG
155971	Envelope surface glycoprotein gp120	3553	IL1B
155971	Envelope surface glycoprotein gp120	3553	IL1B
155971	Envelope surface glycoprotein gp120	3553	IL1B
155971	Envelope surface glycoprotein gp120	3553	IL1B
155971	Envelope surface glycoprotein gp120	3553	IL1B
155971	Envelope surface glycoprotein gp120	3586	IL10
155971	Envelope surface glycoprotein gp120	3586	IL10
155971	Envelope surface glycoprotein gp120	3586	IL10
155971	Envelope surface glycoprotein gp120	3596	IL13
155971	Envelope surface glycoprotein gp120	3596	IL13
155971	Envelope surface glycoprotein gp120	3565	IL4
155971	Envelope surface glycoprotein gp120	3569	IL6
155971	Envelope surface glycoprotein gp120	3569	IL6
155971	Envelope surface glycoprotein gp120	3569	IL6
155971	Envelope surface glycoprotein gp120	3569	IL6
155971	Envelope surface glycoprotein gp120	3569	IL6
155971	Envelope surface glycoprotein gp120	3569	IL6
155971	Envelope surface glycoprotein gp120	3939	LDHA
155971	Envelope surface glycoprotein gp120	3945	LDHB
155971	Envelope surface glycoprotein gp120	3948	LDHC
155971	Envelope surface glycoprotein gp120	4318	MMP9
155971	Envelope surface glycoprotein gp120	197257	LDHD
155971	Envelope surface glycoprotein gp120	7124	TNF
155971	Envelope surface glycoprotein gp120	7124	TNF
155971	Envelope surface glycoprotein gp120	7124	TNF
155971	Envelope surface glycoprotein gp120	7124	TNF
155971	Envelope surface glycoprotein gp120	7124	TNF
155971	Envelope surface glycoprotein gp120	70	ACTC1
155971	Envelope surface glycoprotein gp120	70	ACTC1
155971	Envelope surface glycoprotein gp120	70	ACTC1
155971	Envelope surface glycoprotein gp120	70	ACTC1
155971	Envelope surface glycoprotein gp120	58	ACTA1
155971	Envelope surface glycoprotein gp120	58	ACTA1
155971	Envelope surface glycoprotein gp120	58	ACTA1
155971	Envelope surface glycoprotein gp120	58	ACTA1
155971	Envelope surface glycoprotein gp120	58	ACTA1
155971	Envelope surface glycoprotein gp120	58	ACTA1
155971	Envelope surface glycoprotein gp120	59	ACTA2
155971	Envelope surface glycoprotein gp120	59	ACTA2
155971	Envelope surface glycoprotein gp120	59	ACTA2
155971	Envelope surface glycoprotein gp120	59	ACTA2
155971	Envelope surface glycoprotein gp120	60	ACTB
155971	Envelope surface glycoprotein gp120	60	ACTB
155971	Envelope surface glycoprotein gp120	60	ACTB
155971	Envelope surface glycoprotein gp120	60	ACTB
155971	Envelope surface glycoprotein gp120	71	ACTG1
155971	Envelope surface glycoprotein gp120	71	ACTG1
155971	Envelope surface glycoprotein gp120	71	ACTG1
155971	Envelope surface glycoprotein gp120	71	ACTG1
155971	Envelope surface glycoprotein gp120	72	ACTG2
155971	Envelope surface glycoprotein gp120	72	ACTG2
155971	Envelope surface glycoprotein gp120	72	ACTG2
155971	Envelope surface glycoprotein gp120	72	ACTG2
155971	Envelope surface glycoprotein gp120	3309	HSPA5
155971	Envelope surface glycoprotein gp120	952	CD38
155971	Envelope surface glycoprotein gp120	5004	ORM1
155971	Envelope surface glycoprotein gp120	5005	ORM2
155971	Envelope surface glycoprotein gp120	351	APP
155971	Envelope surface glycoprotein gp120	8862	APLN
155971	Envelope surface glycoprotein gp120	1056	CEL
155971	Envelope surface glycoprotein gp120	1234	CCR5
155971	Envelope surface glycoprotein gp120	1234	CCR5
155971	Envelope surface glycoprotein gp120	1234	CCR5
155971	Envelope surface glycoprotein gp120	1234	CCR5
155971	Envelope surface glycoprotein gp120	6367	CCL22
155971	Envelope surface glycoprotein gp120	6367	CCL22
155971	Envelope surface glycoprotein gp120	6349	CCL3L1
155971	Envelope surface glycoprotein gp120	6351	CCL4
155971	Envelope surface glycoprotein gp120	6351	CCL4
155971	Envelope surface glycoprotein gp120	6352	CCL5
155971	Envelope surface glycoprotein gp120	6352	CCL5
155971	Envelope surface glycoprotein gp120	6352	CCL5
155971	Envelope surface glycoprotein gp120	6352	CCL5
155971	Envelope surface glycoprotein gp120	6352	CCL5
155971	Envelope surface glycoprotein gp120	6354	CCL7
155971	Envelope surface glycoprotein gp120	6355	CCL8
155971	Envelope surface glycoprotein gp120	8536	CAMK1
155971	Envelope surface glycoprotein gp120	814	CAMK4
155971	Envelope surface glycoprotein gp120	5566	PRKACA
155971	Envelope surface glycoprotein gp120	5567	PRKACB
155971	Envelope surface glycoprotein gp120	5568	PRKACG
155971	Envelope surface glycoprotein gp120	1269	CNR2
155971	Envelope surface glycoprotein gp120	8837	CFLAR
155971	Envelope surface glycoprotein gp120	8837	CFLAR
155971	Envelope surface glycoprotein gp120	967	CD63
155971	Envelope surface glycoprotein gp120	967	CD63
155971	Envelope surface glycoprotein gp120	975	CD81
155971	Envelope surface glycoprotein gp120	975	CD81
155971	Envelope surface glycoprotein gp120	3732	CD82
155971	Envelope surface glycoprotein gp120	928	CD9
155971	Envelope surface glycoprotein gp120	928	CD9
155971	Envelope surface glycoprotein gp120	928	CD9
155971	Envelope surface glycoprotein gp120	1524	CX3CR1
155971	Envelope surface glycoprotein gp120	1385	CREB1
155971	Envelope surface glycoprotein gp120	1670	DEFA5
155971	Envelope surface glycoprotein gp120	1670	DEFA5
155971	Envelope surface glycoprotein gp120	1671	DEFA6
155971	Envelope surface glycoprotein gp120	1755	DMBT1
155971	Envelope surface glycoprotein gp120	103	ADAR
155971	Envelope surface glycoprotein gp120	220972	2021-03-08
155971	Envelope surface glycoprotein gp120	6356	CCL11
155971	Envelope surface glycoprotein gp120	2056	EPO
155971	Envelope surface glycoprotein gp120	2357	FPR1
155971	Envelope surface glycoprotein gp120	6376	CX3CL1
155971	Envelope surface glycoprotein gp120	6376	CX3CL1
155971	Envelope surface glycoprotein gp120	3959	LGALS3BP
155971	Envelope surface glycoprotein gp120	2934	GSN
155971	Envelope surface glycoprotein gp120	2571	GAD1
155971	Envelope surface glycoprotein gp120	2876	GPX1
155971	Envelope surface glycoprotein gp120	5047	PAEP
155971	Envelope surface glycoprotein gp120	2932	GSK3B
155971	Envelope surface glycoprotein gp120	116835	HSPA12B
155971	Envelope surface glycoprotein gp120	51182	HSPA14
155971	Envelope surface glycoprotein gp120	3303	HSPA1A
155971	Envelope surface glycoprotein gp120	3304	HSPA1B
155971	Envelope surface glycoprotein gp120	3308	HSPA4
155971	Envelope surface glycoprotein gp120	3310	HSPA6
155971	Envelope surface glycoprotein gp120	3312	HSPA8
155971	Envelope surface glycoprotein gp120	3306	HSPA2
155971	Envelope surface glycoprotein gp120	3082	HGF
155971	Envelope surface glycoprotein gp120	10013	HDAC6
155971	Envelope surface glycoprotein gp120	3479	IGF1
155971	Envelope surface glycoprotein gp120	3479	IGF1
155971	Envelope surface glycoprotein gp120	3439	IFNA1
155971	Envelope surface glycoprotein gp120	3447	IFNA13
155971	Envelope surface glycoprotein gp120	3446	IFNA10
155971	Envelope surface glycoprotein gp120	3448	IFNA14
155971	Envelope surface glycoprotein gp120	3449	IFNA16
155971	Envelope surface glycoprotein gp120	3451	IFNA17
155971	Envelope surface glycoprotein gp120	3440	IFNA2
155971	Envelope surface glycoprotein gp120	3452	IFNA21
155971	Envelope surface glycoprotein gp120	3441	IFNA4
155971	Envelope surface glycoprotein gp120	3443	IFNA6
155971	Envelope surface glycoprotein gp120	3444	IFNA7
155971	Envelope surface glycoprotein gp120	3445	IFNA8
155971	Envelope surface glycoprotein gp120	3458	IFNG
155971	Envelope surface glycoprotein gp120	10581	IFITM2
155971	Envelope surface glycoprotein gp120	10410	IFITM3
155971	Envelope surface glycoprotein gp120	10410	IFITM3
155971	Envelope surface glycoprotein gp120	10410	IFITM3
155971	Envelope surface glycoprotein gp120	3589	IL11
155971	Envelope surface glycoprotein gp120	3592	IL12A
155971	Envelope surface glycoprotein gp120	3593	IL12B
155971	Envelope surface glycoprotein gp120	3558	IL2
155971	Envelope surface glycoprotein gp120	3558	IL2
155971	Envelope surface glycoprotein gp120	10657	KHDRBS1
155971	Envelope surface glycoprotein gp120	3811	KIR3DL1
155971	Envelope surface glycoprotein gp120	965	CD58
155971	Envelope surface glycoprotein gp120	1432	MAPK14
155971	Envelope surface glycoprotein gp120	1667	DEFA1
155971	Envelope surface glycoprotein gp120	1668	DEFA3
155971	Envelope surface glycoprotein gp120	1669	DEFA4
155971	Envelope surface glycoprotein gp120	4792	NFKBIA
155971	Envelope surface glycoprotein gp120	55746	NUP133
155971	Envelope surface glycoprotein gp120	5289	PIK3C3
155971	Envelope surface glycoprotein gp120	5295	PIK3R1
155971	Envelope surface glycoprotein gp120	5296	PIK3R2
155971	Envelope surface glycoprotein gp120	5290	PIK3CA
155971	Envelope surface glycoprotein gp120	5291	PIK3CB
155971	Envelope surface glycoprotein gp120	5293	PIK3CD
155971	Envelope surface glycoprotein gp120	5294	PIK3CG
155971	Envelope surface glycoprotein gp120	5286	PIK3C2A
155971	Envelope surface glycoprotein gp120	5287	PIK3C2B
155971	Envelope surface glycoprotein gp120	5288	PIK3C2G
155971	Envelope surface glycoprotein gp120	5155	PDGFB
155971	Envelope surface glycoprotein gp120	5155	PDGFB
155971	Envelope surface glycoprotein gp120	5155	PDGFB
155971	Envelope surface glycoprotein gp120	5304	PIP
155971	Envelope surface glycoprotein gp120	5304	PIP
155971	Envelope surface glycoprotein gp120	653509	SFTPA1
155971	Envelope surface glycoprotein gp120	6441	SFTPD
155971	Envelope surface glycoprotein gp120	207	AKT1
155971	Envelope surface glycoprotein gp120	207	AKT1
155971	Envelope surface glycoprotein gp120	207	AKT1
155971	Envelope surface glycoprotein gp120	208	AKT2
155971	Envelope surface glycoprotein gp120	208	AKT2
155971	Envelope surface glycoprotein gp120	208	AKT2
155971	Envelope surface glycoprotein gp120	10000	AKT3
155971	Envelope surface glycoprotein gp120	10000	AKT3
155971	Envelope surface glycoprotein gp120	10000	AKT3
155971	Envelope surface glycoprotein gp120	54538	ROBO4
155971	Envelope surface glycoprotein gp120	9353	SLIT2
155971	Envelope surface glycoprotein gp120	9353	SLIT2
155971	Envelope surface glycoprotein gp120	9353	SLIT2
155971	Envelope surface glycoprotein gp120	9353	SLIT2
155971	Envelope surface glycoprotein gp120	9353	SLIT2
155971	Envelope surface glycoprotein gp120	9353	SLIT2
155971	Envelope surface glycoprotein gp120	9353	SLIT2
155971	Envelope surface glycoprotein gp120	9353	SLIT2
155971	Envelope surface glycoprotein gp120	9353	SLIT2
155971	Envelope surface glycoprotein gp120	6610	SMPD2
155971	Envelope surface glycoprotein gp120	6609	SMPD1
155971	Envelope surface glycoprotein gp120	3313	HSPA9
155971	Envelope surface glycoprotein gp120	6387	CXCL12
155971	Envelope surface glycoprotein gp120	6387	CXCL12
155971	Envelope surface glycoprotein gp120	6387	CXCL12
155971	Envelope surface glycoprotein gp120	6387	CXCL12
155971	Envelope surface glycoprotein gp120	6387	CXCL12
155971	Envelope surface glycoprotein gp120	6387	CXCL12
155971	Envelope surface glycoprotein gp120	6647	SOD1
155971	Envelope surface glycoprotein gp120	914	CD2
155971	Envelope surface glycoprotein gp120	920	CD4
155971	Envelope surface glycoprotein gp120	920	CD4
155971	Envelope surface glycoprotein gp120	920	CD4
155971	Envelope surface glycoprotein gp120	940	CD28
155971	Envelope surface glycoprotein gp120	941	CD80
155971	Envelope surface glycoprotein gp120	7102	TSPAN7
155971	Envelope surface glycoprotein gp120	29896	TRA2A
155971	Envelope surface glycoprotein gp120	6434	TRA2B
155971	Envelope surface glycoprotein gp120	7432	VIP
155971	Envelope surface glycoprotein gp120	7432	VIP
155971	Envelope surface glycoprotein gp120	100	ADA
155971	Envelope surface glycoprotein gp120	1234	CCR5
155971	Envelope surface glycoprotein gp120	1235	CCR6
155971	Envelope surface glycoprotein gp120	1236	CCR7
155971	Envelope surface glycoprotein gp120	6364	CCL20
155971	Envelope surface glycoprotein gp120	6366	CCL21
155971	Envelope surface glycoprotein gp120	6348	CCL3
155971	Envelope surface glycoprotein gp120	6348	CCL3
155971	Envelope surface glycoprotein gp120	6351	CCL4
155971	Envelope surface glycoprotein gp120	6352	CCL5
155971	Envelope surface glycoprotein gp120	9902	MRC2
155971	Envelope surface glycoprotein gp120	7852	CXCR4
155971	Envelope surface glycoprotein gp120	3627	CXCL10
155971	Envelope surface glycoprotein gp120	999	CDH1
155971	Envelope surface glycoprotein gp120	959	CD40LG
155971	Envelope surface glycoprotein gp120	9308	CD83
155971	Envelope surface glycoprotein gp120	1803	DPP4
155971	Envelope surface glycoprotein gp120	103	ADAR
155971	Envelope surface glycoprotein gp120	104	ADARB1
155971	Envelope surface glycoprotein gp120	105	ADARB2
155971	Envelope surface glycoprotein gp120	2246	FGF1
155971	Envelope surface glycoprotein gp120	2821	GPI
155971	Envelope surface glycoprotein gp120	83953	FCAMR
155971	Envelope surface glycoprotein gp120	3108	HLA-DMA
155971	Envelope surface glycoprotein gp120	3109	HLA-DMB
155971	Envelope surface glycoprotein gp120	3111	HLA-DOA
155971	Envelope surface glycoprotein gp120	3112	HLA-DOB
155971	Envelope surface glycoprotein gp120	3113	HLA-DPA1
155971	Envelope surface glycoprotein gp120	3115	HLA-DPB1
155971	Envelope surface glycoprotein gp120	3117	HLA-DQA1
155971	Envelope surface glycoprotein gp120	3118	HLA-DQA2
155971	Envelope surface glycoprotein gp120	3119	HLA-DQB1
155971	Envelope surface glycoprotein gp120	3120	HLA-DQB2
155971	Envelope surface glycoprotein gp120	3122	HLA-DRA
155971	Envelope surface glycoprotein gp120	2217	FCGRT
155971	Envelope surface glycoprotein gp120	2204	FCAR
155971	Envelope surface glycoprotein gp120	3678	ITGA5
155971	Envelope surface glycoprotein gp120	3688	ITGB1
155971	Envelope surface glycoprotein gp120	3439	IFNA1
155971	Envelope surface glycoprotein gp120	3439	IFNA1
155971	Envelope surface glycoprotein gp120	3447	IFNA13
155971	Envelope surface glycoprotein gp120	3447	IFNA13
155971	Envelope surface glycoprotein gp120	3447	IFNA13
155971	Envelope surface glycoprotein gp120	3446	IFNA10
155971	Envelope surface glycoprotein gp120	3446	IFNA10
155971	Envelope surface glycoprotein gp120	3446	IFNA10
155971	Envelope surface glycoprotein gp120	3448	IFNA14
155971	Envelope surface glycoprotein gp120	3448	IFNA14
155971	Envelope surface glycoprotein gp120	3448	IFNA14
155971	Envelope surface glycoprotein gp120	3449	IFNA16
155971	Envelope surface glycoprotein gp120	3449	IFNA16
155971	Envelope surface glycoprotein gp120	3451	IFNA17
155971	Envelope surface glycoprotein gp120	3451	IFNA17
155971	Envelope surface glycoprotein gp120	3451	IFNA17
155971	Envelope surface glycoprotein gp120	3440	IFNA2
155971	Envelope surface glycoprotein gp120	3440	IFNA2
155971	Envelope surface glycoprotein gp120	3452	IFNA21
155971	Envelope surface glycoprotein gp120	3452	IFNA21
155971	Envelope surface glycoprotein gp120	3452	IFNA21
155971	Envelope surface glycoprotein gp120	3441	IFNA4
155971	Envelope surface glycoprotein gp120	3441	IFNA4
155971	Envelope surface glycoprotein gp120	3441	IFNA4
155971	Envelope surface glycoprotein gp120	3442	IFNA5
155971	Envelope surface glycoprotein gp120	3442	IFNA5
155971	Envelope surface glycoprotein gp120	3442	IFNA5
155971	Envelope surface glycoprotein gp120	3442	IFNA5
155971	Envelope surface glycoprotein gp120	3443	IFNA6
155971	Envelope surface glycoprotein gp120	3443	IFNA6
155971	Envelope surface glycoprotein gp120	3443	IFNA6
155971	Envelope surface glycoprotein gp120	3444	IFNA7
155971	Envelope surface glycoprotein gp120	3444	IFNA7
155971	Envelope surface glycoprotein gp120	3445	IFNA8
155971	Envelope surface glycoprotein gp120	3445	IFNA8
155971	Envelope surface glycoprotein gp120	3445	IFNA8
155971	Envelope surface glycoprotein gp120	3456	IFNB1
155971	Envelope surface glycoprotein gp120	3458	IFNG
155971	Envelope surface glycoprotein gp120	3458	IFNG
155971	Envelope surface glycoprotein gp120	3458	IFNG
155971	Envelope surface glycoprotein gp120	3458	IFNG
155971	Envelope surface glycoprotein gp120	3558	IL2
155971	Envelope surface glycoprotein gp120	3558	IL2
155971	Envelope surface glycoprotein gp120	3569	IL6
155971	Envelope surface glycoprotein gp120	3569	IL6
155971	Envelope surface glycoprotein gp120	3569	IL6
155971	Envelope surface glycoprotein gp120	284217	LAMA1
155971	Envelope surface glycoprotein gp120	3908	LAMA2
155971	Envelope surface glycoprotein gp120	3909	LAMA3
155971	Envelope surface glycoprotein gp120	3910	LAMA4
155971	Envelope surface glycoprotein gp120	3911	LAMA5
155971	Envelope surface glycoprotein gp120	4360	MRC1
155971	Envelope surface glycoprotein gp120	3123	HLA-DRB1
155971	Envelope surface glycoprotein gp120	3125	HLA-DRB3
155971	Envelope surface glycoprotein gp120	3126	HLA-DRB4
155971	Envelope surface glycoprotein gp120	3127	HLA-DRB5
155971	Envelope surface glycoprotein gp120	4988	OPRM1
155971	Envelope surface glycoprotein gp120	4790	NFKB1
155971	Envelope surface glycoprotein gp120	4772	NFATC1
155971	Envelope surface glycoprotein gp120	4773	NFATC2
155971	Envelope surface glycoprotein gp120	4775	NFATC3
155971	Envelope surface glycoprotein gp120	4776	NFATC4
155971	Envelope surface glycoprotein gp120	5478	PPIA
155971	Envelope surface glycoprotein gp120	5479	PPIB
155971	Envelope surface glycoprotein gp120	2353	FOS
155971	Envelope surface glycoprotein gp120	6774	STAT3
155971	Envelope surface glycoprotein gp120	6774	STAT3
155971	Envelope surface glycoprotein gp120	6387	CXCL12
155971	Envelope surface glycoprotein gp120	6387	CXCL12
155971	Envelope surface glycoprotein gp120	6387	CXCL12
155971	Envelope surface glycoprotein gp120	6387	CXCL12
155971	Envelope surface glycoprotein gp120	6387	CXCL12
155971	Envelope surface glycoprotein gp120	915	CD3D
155971	Envelope surface glycoprotein gp120	915	CD3D
155971	Envelope surface glycoprotein gp120	916	CD3E
155971	Envelope surface glycoprotein gp120	916	CD3E
155971	Envelope surface glycoprotein gp120	917	CD3G
155971	Envelope surface glycoprotein gp120	917	CD3G
155971	Envelope surface glycoprotein gp120	920	CD4
155971	Envelope surface glycoprotein gp120	940	CD28
155971	Envelope surface glycoprotein gp120	941	CD80
155971	Envelope surface glycoprotein gp120	941	CD80
155971	Envelope surface glycoprotein gp120	942	CD86
155971	Envelope surface glycoprotein gp120	54106	TLR9
155971	Envelope surface glycoprotein gp120	54106	TLR9
155971	Envelope surface glycoprotein gp120	3725	JUN
155971	Envelope surface glycoprotein gp120	7124	TNF
155971	Envelope surface glycoprotein gp120	958	CD40
155971	Envelope surface glycoprotein gp120	958	CD40
155971	Envelope surface glycoprotein gp120	3932	LCK
155971	Envelope surface glycoprotein gp120	10971	YWHAQ
155971	Envelope surface glycoprotein gp120	7368	UGT8
155971	Envelope surface glycoprotein gp120	5717	PSMD11
155971	Envelope surface glycoprotein gp120	5713	PSMD7
155971	Envelope surface glycoprotein gp120	51150	SDF4
155971	Envelope surface glycoprotein gp120	70	ACTC1
155971	Envelope surface glycoprotein gp120	58	ACTA1
155971	Envelope surface glycoprotein gp120	59	ACTA2
155971	Envelope surface glycoprotein gp120	60	ACTB
155971	Envelope surface glycoprotein gp120	71	ACTG1
155971	Envelope surface glycoprotein gp120	72	ACTG2
155971	Envelope surface glycoprotein gp120	952	CD38
155971	Envelope surface glycoprotein gp120	952	CD38
155971	Envelope surface glycoprotein gp120	174	AFP
155971	Envelope surface glycoprotein gp120	302	ANXA2
155971	Envelope surface glycoprotein gp120	187	APLNR
155971	Envelope surface glycoprotein gp120	348	APOE
155971	Envelope surface glycoprotein gp120	581	BAX
155971	Envelope surface glycoprotein gp120	581	BAX
155971	Envelope surface glycoprotein gp120	10572	SIVA1
155971	Envelope surface glycoprotein gp120	3339	HSPG2
155971	Envelope surface glycoprotein gp120	3339	HSPG2
155971	Envelope surface glycoprotein gp120	598	BCL2L1
155971	Envelope surface glycoprotein gp120	572	BAD
155971	Envelope surface glycoprotein gp120	572	BAD
155971	Envelope surface glycoprotein gp120	572	BAD
155971	Envelope surface glycoprotein gp120	627	BDNF
155971	Envelope surface glycoprotein gp120	729230	CCR2
155971	Envelope surface glycoprotein gp120	1232	CCR3
155971	Envelope surface glycoprotein gp120	1234	CCR5
155971	Envelope surface glycoprotein gp120	1234	CCR5
155971	Envelope surface glycoprotein gp120	1234	CCR5
155971	Envelope surface glycoprotein gp120	1234	CCR5
155971	Envelope surface glycoprotein gp120	1234	CCR5
155971	Envelope surface glycoprotein gp120	1234	CCR5
155971	Envelope surface glycoprotein gp120	1234	CCR5
155971	Envelope surface glycoprotein gp120	1234	CCR5
155971	Envelope surface glycoprotein gp120	1234	CCR5
155971	Envelope surface glycoprotein gp120	1234	CCR5
155971	Envelope surface glycoprotein gp120	1234	CCR5
155971	Envelope surface glycoprotein gp120	1234	CCR5
155971	Envelope surface glycoprotein gp120	1234	CCR5
155971	Envelope surface glycoprotein gp120	1234	CCR5
155971	Envelope surface glycoprotein gp120	1234	CCR5
155971	Envelope surface glycoprotein gp120	1234	CCR5
155971	Envelope surface glycoprotein gp120	1234	CCR5
155971	Envelope surface glycoprotein gp120	1234	CCR5
155971	Envelope surface glycoprotein gp120	1234	CCR5
155971	Envelope surface glycoprotein gp120	1234	CCR5
155971	Envelope surface glycoprotein gp120	1234	CCR5
155971	Envelope surface glycoprotein gp120	1234	CCR5
155971	Envelope surface glycoprotein gp120	1234	CCR5
155971	Envelope surface glycoprotein gp120	1234	CCR5
155971	Envelope surface glycoprotein gp120	1234	CCR5
155971	Envelope surface glycoprotein gp120	1234	CCR5
155971	Envelope surface glycoprotein gp120	1234	CCR5
155971	Envelope surface glycoprotein gp120	1237	CCR8
155971	Envelope surface glycoprotein gp120	6347	CCL2
155971	Envelope surface glycoprotein gp120	6348	CCL3
155971	Envelope surface glycoprotein gp120	6348	CCL3
155971	Envelope surface glycoprotein gp120	6348	CCL3
155971	Envelope surface glycoprotein gp120	6351	CCL4
155971	Envelope surface glycoprotein gp120	6351	CCL4
155971	Envelope surface glycoprotein gp120	170482	CLEC4C
155971	Envelope surface glycoprotein gp120	9902	MRC2
155971	Envelope surface glycoprotein gp120	7852	CXCR4
155971	Envelope surface glycoprotein gp120	7852	CXCR4
155971	Envelope surface glycoprotein gp120	7852	CXCR4
155971	Envelope surface glycoprotein gp120	7852	CXCR4
155971	Envelope surface glycoprotein gp120	7852	CXCR4
155971	Envelope surface glycoprotein gp120	7852	CXCR4
155971	Envelope surface glycoprotein gp120	7852	CXCR4
155971	Envelope surface glycoprotein gp120	7852	CXCR4
155971	Envelope surface glycoprotein gp120	7852	CXCR4
155971	Envelope surface glycoprotein gp120	7852	CXCR4
155971	Envelope surface glycoprotein gp120	7852	CXCR4
155971	Envelope surface glycoprotein gp120	7852	CXCR4
155971	Envelope surface glycoprotein gp120	7852	CXCR4
155971	Envelope surface glycoprotein gp120	7852	CXCR4
155971	Envelope surface glycoprotein gp120	7852	CXCR4
155971	Envelope surface glycoprotein gp120	7852	CXCR4
155971	Envelope surface glycoprotein gp120	7852	CXCR4
155971	Envelope surface glycoprotein gp120	7852	CXCR4
155971	Envelope surface glycoprotein gp120	7852	CXCR4
155971	Envelope surface glycoprotein gp120	7852	CXCR4
155971	Envelope surface glycoprotein gp120	7852	CXCR4
155971	Envelope surface glycoprotein gp120	7852	CXCR4
155971	Envelope surface glycoprotein gp120	7852	CXCR4
155971	Envelope surface glycoprotein gp120	7852	CXCR4
155971	Envelope surface glycoprotein gp120	7852	CXCR4
155971	Envelope surface glycoprotein gp120	7852	CXCR4
155971	Envelope surface glycoprotein gp120	7852	CXCR4
155971	Envelope surface glycoprotein gp120	7852	CXCR4
155971	Envelope surface glycoprotein gp120	7852	CXCR4
155971	Envelope surface glycoprotein gp120	7852	CXCR4
155971	Envelope surface glycoprotein gp120	7852	CXCR4
155971	Envelope surface glycoprotein gp120	10663	CXCR6
155971	Envelope surface glycoprotein gp120	10663	CXCR6
155971	Envelope surface glycoprotein gp120	1179	CLCA1
155971	Envelope surface glycoprotein gp120	9635	CLCA2
155971	Envelope surface glycoprotein gp120	22802	CLCA4
155971	Envelope surface glycoprotein gp120	3778	KCNMA1
155971	Envelope surface glycoprotein gp120	10242	KCNMB2
155971	Envelope surface glycoprotein gp120	27094	KCNMB3
155971	Envelope surface glycoprotein gp120	27345	KCNMB4
155971	Envelope surface glycoprotein gp120	1047	CLGN
155971	Envelope surface glycoprotein gp120	811	CALR
155971	Envelope surface glycoprotein gp120	813	CALU
155971	Envelope surface glycoprotein gp120	5566	PRKACA
155971	Envelope surface glycoprotein gp120	5566	PRKACA
155971	Envelope surface glycoprotein gp120	5567	PRKACB
155971	Envelope surface glycoprotein gp120	5567	PRKACB
155971	Envelope surface glycoprotein gp120	5568	PRKACG
155971	Envelope surface glycoprotein gp120	5568	PRKACG
155971	Envelope surface glycoprotein gp120	5573	PRKAR1A
155971	Envelope surface glycoprotein gp120	5576	PRKAR2A
155971	Envelope surface glycoprotein gp120	1268	CNR1
155971	Envelope surface glycoprotein gp120	1269	CNR2
155971	Envelope surface glycoprotein gp120	1269	CNR2
155971	Envelope surface glycoprotein gp120	834	CASP1
155971	Envelope surface glycoprotein gp120	834	CASP1
155971	Envelope surface glycoprotein gp120	836	CASP3
155971	Envelope surface glycoprotein gp120	836	CASP3
155971	Envelope surface glycoprotein gp120	30835	CD209
155971	Envelope surface glycoprotein gp120	30835	CD209
155971	Envelope surface glycoprotein gp120	30835	CD209
155971	Envelope surface glycoprotein gp120	30835	CD209
155971	Envelope surface glycoprotein gp120	30835	CD209
155971	Envelope surface glycoprotein gp120	30835	CD209
155971	Envelope surface glycoprotein gp120	30835	CD209
155971	Envelope surface glycoprotein gp120	30835	CD209
155971	Envelope surface glycoprotein gp120	30835	CD209
155971	Envelope surface glycoprotein gp120	30835	CD209
155971	Envelope surface glycoprotein gp120	30835	CD209
155971	Envelope surface glycoprotein gp120	30835	CD209
155971	Envelope surface glycoprotein gp120	30835	CD209
155971	Envelope surface glycoprotein gp120	30835	CD209
155971	Envelope surface glycoprotein gp120	939	CD27
155971	Envelope surface glycoprotein gp120	966	CD59
155971	Envelope surface glycoprotein gp120	966	CD59
155971	Envelope surface glycoprotein gp120	966	CD59
155971	Envelope surface glycoprotein gp120	7157	TP53
155971	Envelope surface glycoprotein gp120	7157	TP53
155971	Envelope surface glycoprotein gp120	7157	TP53
155971	Envelope surface glycoprotein gp120	1240	CMKLR1
155971	Envelope surface glycoprotein gp120	10036	CHAF1A
155971	Envelope surface glycoprotein gp120	1366	CLDN7
155971	Envelope surface glycoprotein gp120	1072	CFL1
155971	Envelope surface glycoprotein gp120	1073	CFL2
155971	Envelope surface glycoprotein gp120	712	C1QA
155971	Envelope surface glycoprotein gp120	713	C1QB
155971	Envelope surface glycoprotein gp120	714	C1QC
155971	Envelope surface glycoprotein gp120	718	C3
155971	Envelope surface glycoprotein gp120	718	C3
155971	Envelope surface glycoprotein gp120	721	C4B
155971	Envelope surface glycoprotein gp120	1604	CD55
155971	Envelope surface glycoprotein gp120	1604	CD55
155971	Envelope surface glycoprotein gp120	3075	CFH
155971	Envelope surface glycoprotein gp120	3075	CFH
155971	Envelope surface glycoprotein gp120	1536	CYBB
155971	Envelope surface glycoprotein gp120	1536	CYBB
155971	Envelope surface glycoprotein gp120	1571	CYP2E1
155971	Envelope surface glycoprotein gp120	9730	DCAF1
155971	Envelope surface glycoprotein gp120	1755	DMBT1
155971	Envelope surface glycoprotein gp120	1755	DMBT1
155971	Envelope surface glycoprotein gp120	1803	DPP4
155971	Envelope surface glycoprotein gp120	1803	DPP4
155971	Envelope surface glycoprotein gp120	1803	DPP4
155971	Envelope surface glycoprotein gp120	1803	DPP4
155971	Envelope surface glycoprotein gp120	7153	TOP2A
155971	Envelope surface glycoprotein gp120	51726	DNAJB11
155971	Envelope surface glycoprotein gp120	55658	RNF126
155971	Envelope surface glycoprotein gp120	2202	EFEMP1
155971	Envelope surface glycoprotein gp120	51466	EVL
155971	Envelope surface glycoprotein gp120	11253	MAN1B1
155971	Envelope surface glycoprotein gp120	23071	ERP44
155971	Envelope surface glycoprotein gp120	80267	EDEM3
155971	Envelope surface glycoprotein gp120	2100	ESR2
155971	Envelope surface glycoprotein gp120	2099	ESR1
155971	Envelope surface glycoprotein gp120	6506	SLC1A2
155971	Envelope surface glycoprotein gp120	2247	FGF2
155971	Envelope surface glycoprotein gp120	2220	FCN2
155971	Envelope surface glycoprotein gp120	2316	FLNA
155971	Envelope surface glycoprotein gp120	2825	GPR1
155971	Envelope surface glycoprotein gp120	2838	GPR15
155971	Envelope surface glycoprotein gp120	3956	LGALS1
155971	Envelope surface glycoprotein gp120	2670	GFAP
155971	Envelope surface glycoprotein gp120	5589	PRKCSH
155971	Envelope surface glycoprotein gp120	2902	GRIN1
155971	Envelope surface glycoprotein gp120	2903	GRIN2A
155971	Envelope surface glycoprotein gp120	2904	GRIN2B
155971	Envelope surface glycoprotein gp120	2905	GRIN2C
155971	Envelope surface glycoprotein gp120	2906	GRIN2D
155971	Envelope surface glycoprotein gp120	116443	GRIN3A
155971	Envelope surface glycoprotein gp120	116443	GRIN3A
155971	Envelope surface glycoprotein gp120	116444	GRIN3B
155971	Envelope surface glycoprotein gp120	116444	GRIN3B
155971	Envelope surface glycoprotein gp120	2932	GSK3B
155971	Envelope surface glycoprotein gp120	2770	GNAI1
155971	Envelope surface glycoprotein gp120	2770	GNAI1
155971	Envelope surface glycoprotein gp120	2771	GNAI2
155971	Envelope surface glycoprotein gp120	2771	GNAI2
155971	Envelope surface glycoprotein gp120	2773	GNAI3
155971	Envelope surface glycoprotein gp120	2773	GNAI3
155971	Envelope surface glycoprotein gp120	6782	HSPA13
155971	Envelope surface glycoprotein gp120	3310	HSPA6
155971	Envelope surface glycoprotein gp120	10808	HSPH1
155971	Envelope surface glycoprotein gp120	8350	HIST1H3A
155971	Envelope surface glycoprotein gp120	3105	HLA-A
155971	Envelope surface glycoprotein gp120	3133	HLA-E
155971	Envelope surface glycoprotein gp120	3133	HLA-E
155971	Envelope surface glycoprotein gp120	3134	HLA-F
155971	Envelope surface glycoprotein gp120	3135	HLA-G
155971	Envelope surface glycoprotein gp120	3107	HLA-C
155971	Envelope surface glycoprotein gp120	3107	HLA-C
155971	Envelope surface glycoprotein gp120	3107	HLA-C
155971	Envelope surface glycoprotein gp120	3107	HLA-C
155971	Envelope surface glycoprotein gp120	3108	HLA-DMA
155971	Envelope surface glycoprotein gp120	3109	HLA-DMB
155971	Envelope surface glycoprotein gp120	3111	HLA-DOA
155971	Envelope surface glycoprotein gp120	3112	HLA-DOB
155971	Envelope surface glycoprotein gp120	3113	HLA-DPA1
155971	Envelope surface glycoprotein gp120	3115	HLA-DPB1
155971	Envelope surface glycoprotein gp120	3117	HLA-DQA1
155971	Envelope surface glycoprotein gp120	3118	HLA-DQA2
155971	Envelope surface glycoprotein gp120	3119	HLA-DQB1
155971	Envelope surface glycoprotein gp120	3120	HLA-DQB2
155971	Envelope surface glycoprotein gp120	3122	HLA-DRA
155971	Envelope surface glycoprotein gp120	3122	HLA-DRA
155971	Envelope surface glycoprotein gp120	3122	HLA-DRA
155971	Envelope surface glycoprotein gp120	10525	HYOU1
155971	Envelope surface glycoprotein gp120	3091	HIF1A
155971	Envelope surface glycoprotein gp120	3676	ITGA4
155971	Envelope surface glycoprotein gp120	3676	ITGA4
155971	Envelope surface glycoprotein gp120	3676	ITGA4
155971	Envelope surface glycoprotein gp120	3676	ITGA4
155971	Envelope surface glycoprotein gp120	3676	ITGA4
155971	Envelope surface glycoprotein gp120	3678	ITGA5
155971	Envelope surface glycoprotein gp120	3683	ITGAL
155971	Envelope surface glycoprotein gp120	3683	ITGAL
155971	Envelope surface glycoprotein gp120	3683	ITGAL
155971	Envelope surface glycoprotein gp120	3683	ITGAL
155971	Envelope surface glycoprotein gp120	3684	ITGAM
155971	Envelope surface glycoprotein gp120	3685	ITGAV
155971	Envelope surface glycoprotein gp120	3685	ITGAV
155971	Envelope surface glycoprotein gp120	3687	ITGAX
155971	Envelope surface glycoprotein gp120	3688	ITGB1
155971	Envelope surface glycoprotein gp120	3689	ITGB2
155971	Envelope surface glycoprotein gp120	3689	ITGB2
155971	Envelope surface glycoprotein gp120	3689	ITGB2
155971	Envelope surface glycoprotein gp120	3690	ITGB3
155971	Envelope surface glycoprotein gp120	3693	ITGB5
155971	Envelope surface glycoprotein gp120	3694	ITGB6
155971	Envelope surface glycoprotein gp120	3695	ITGB7
155971	Envelope surface glycoprotein gp120	3695	ITGB7
155971	Envelope surface glycoprotein gp120	3695	ITGB7
155971	Envelope surface glycoprotein gp120	3383	ICAM1
155971	Envelope surface glycoprotein gp120	3383	ICAM1
155971	Envelope surface glycoprotein gp120	3383	ICAM1
155971	Envelope surface glycoprotein gp120	3383	ICAM1
155971	Envelope surface glycoprotein gp120	3385	ICAM3
155971	Envelope surface glycoprotein gp120	3439	IFNA1
155971	Envelope surface glycoprotein gp120	3447	IFNA13
155971	Envelope surface glycoprotein gp120	3446	IFNA10
155971	Envelope surface glycoprotein gp120	3448	IFNA14
155971	Envelope surface glycoprotein gp120	3449	IFNA16
155971	Envelope surface glycoprotein gp120	3451	IFNA17
155971	Envelope surface glycoprotein gp120	3440	IFNA2
155971	Envelope surface glycoprotein gp120	3452	IFNA21
155971	Envelope surface glycoprotein gp120	3441	IFNA4
155971	Envelope surface glycoprotein gp120	3442	IFNA5
155971	Envelope surface glycoprotein gp120	3443	IFNA6
155971	Envelope surface glycoprotein gp120	3444	IFNA7
155971	Envelope surface glycoprotein gp120	3445	IFNA8
155971	Envelope surface glycoprotein gp120	3458	IFNG
155971	Envelope surface glycoprotein gp120	3458	IFNG
155971	Envelope surface glycoprotein gp120	3458	IFNG
155971	Envelope surface glycoprotein gp120	3458	IFNG
155971	Envelope surface glycoprotein gp120	3458	IFNG
155971	Envelope surface glycoprotein gp120	3458	IFNG
155971	Envelope surface glycoprotein gp120	3458	IFNG
155971	Envelope surface glycoprotein gp120	3458	IFNG
155971	Envelope surface glycoprotein gp120	3458	IFNG
155971	Envelope surface glycoprotein gp120	8519	IFITM1
155971	Envelope surface glycoprotein gp120	10581	IFITM2
155971	Envelope surface glycoprotein gp120	10410	IFITM3
155971	Envelope surface glycoprotein gp120	5610	EIF2AK2
155971	Envelope surface glycoprotein gp120	5610	EIF2AK2
155971	Envelope surface glycoprotein gp120	3552	IL1A
155971	Envelope surface glycoprotein gp120	3558	IL2
155971	Envelope surface glycoprotein gp120	51561	IL23A
155971	Envelope surface glycoprotein gp120	3565	IL4
155971	Envelope surface glycoprotein gp120	3574	IL7
155971	Envelope surface glycoprotein gp120	3783	KCNN4
155971	Envelope surface glycoprotein gp120	4312	MMP1
155971	Envelope surface glycoprotein gp120	4986	OPRK1
155971	Envelope surface glycoprotein gp120	3976	LIF
155971	Envelope surface glycoprotein gp120	6693	SPN
155971	Envelope surface glycoprotein gp120	3984	LIMK1
155971	Envelope surface glycoprotein gp120	3985	LIMK2
155971	Envelope surface glycoprotein gp120	3949	LDLR
155971	Envelope surface glycoprotein gp120	965	CD58
155971	Envelope surface glycoprotein gp120	4046	LSP1
155971	Envelope surface glycoprotein gp120	6375	XCL1
155971	Envelope surface glycoprotein gp120	6375	XCL1
155971	Envelope surface glycoprotein gp120	6375	XCL1
155971	Envelope surface glycoprotein gp120	4360	MRC1
155971	Envelope surface glycoprotein gp120	84061	MAGT1
155971	Envelope surface glycoprotein gp120	3106	HLA-B
155971	Envelope surface glycoprotein gp120	3123	HLA-DRB1
155971	Envelope surface glycoprotein gp120	3123	HLA-DRB1
155971	Envelope surface glycoprotein gp120	3123	HLA-DRB1
155971	Envelope surface glycoprotein gp120	3125	HLA-DRB3
155971	Envelope surface glycoprotein gp120	3125	HLA-DRB3
155971	Envelope surface glycoprotein gp120	3125	HLA-DRB3
155971	Envelope surface glycoprotein gp120	3126	HLA-DRB4
155971	Envelope surface glycoprotein gp120	3126	HLA-DRB4
155971	Envelope surface glycoprotein gp120	3126	HLA-DRB4
155971	Envelope surface glycoprotein gp120	3127	HLA-DRB5
155971	Envelope surface glycoprotein gp120	3127	HLA-DRB5
155971	Envelope surface glycoprotein gp120	3127	HLA-DRB5
155971	Envelope surface glycoprotein gp120	4153	MBL2
155971	Envelope surface glycoprotein gp120	7841	MOGS
155971	Envelope surface glycoprotein gp120	84331	MCRIP2
155971	Envelope surface glycoprotein gp120	4318	MMP9
155971	Envelope surface glycoprotein gp120	1432	MAPK14
155971	Envelope surface glycoprotein gp120	1432	MAPK14
155971	Envelope surface glycoprotein gp120	1432	MAPK14
155971	Envelope surface glycoprotein gp120	1432	MAPK14
155971	Envelope surface glycoprotein gp120	1432	MAPK14
155971	Envelope surface glycoprotein gp120	1432	MAPK14
155971	Envelope surface glycoprotein gp120	4296	MAP3K11
155971	Envelope surface glycoprotein gp120	4092	SMAD7
155971	Envelope surface glycoprotein gp120	2358	FPR2
155971	Envelope surface glycoprotein gp120	9368	SLC9A3R1
155971	Envelope surface glycoprotein gp120	9368	SLC9A3R1
155971	Envelope surface glycoprotein gp120	9368	SLC9A3R1
155971	Envelope surface glycoprotein gp120	50507	NOX4
155971	Envelope surface glycoprotein gp120	5818	NECTIN1
155971	Envelope surface glycoprotein gp120	23193	GANAB
155971	Envelope surface glycoprotein gp120	4842	NOS1
155971	Envelope surface glycoprotein gp120	4790	NFKB1
155971	Envelope surface glycoprotein gp120	4790	NFKB1
155971	Envelope surface glycoprotein gp120	4790	NFKB1
155971	Envelope surface glycoprotein gp120	4790	NFKB1
155971	Envelope surface glycoprotein gp120	4790	NFKB1
155971	Envelope surface glycoprotein gp120	4790	NFKB1
155971	Envelope surface glycoprotein gp120	81929	SEH1L
155971	Envelope surface glycoprotein gp120	5023	P2RX1
155971	Envelope surface glycoprotein gp120	5027	P2RX7
155971	Envelope surface glycoprotein gp120	24145	PANX1
155971	Envelope surface glycoprotein gp120	3603	IL16
155971	Envelope surface glycoprotein gp120	1656	DDX6
155971	Envelope surface glycoprotein gp120	8974	P4HA2
155971	Envelope surface glycoprotein gp120	5742	PTGS1
155971	Envelope surface glycoprotein gp120	5743	PTGS2
155971	Envelope surface glycoprotein gp120	5694	PSMB6
155971	Envelope surface glycoprotein gp120	22794	CASC3
155971	Envelope surface glycoprotein gp120	64714	PDIA2
155971	Envelope surface glycoprotein gp120	64714	PDIA2
155971	Envelope surface glycoprotein gp120	2923	PDIA3
155971	Envelope surface glycoprotein gp120	2923	PDIA3
155971	Envelope surface glycoprotein gp120	9601	PDIA4
155971	Envelope surface glycoprotein gp120	9601	PDIA4
155971	Envelope surface glycoprotein gp120	10954	PDIA5
155971	Envelope surface glycoprotein gp120	10954	PDIA5
155971	Envelope surface glycoprotein gp120	10954	PDIA5
155971	Envelope surface glycoprotein gp120	10130	PDIA6
155971	Envelope surface glycoprotein gp120	10130	PDIA6
155971	Envelope surface glycoprotein gp120	5034	P4HB
155971	Envelope surface glycoprotein gp120	5034	P4HB
155971	Envelope surface glycoprotein gp120	5578	PRKCA
155971	Envelope surface glycoprotein gp120	5578	PRKCA
155971	Envelope surface glycoprotein gp120	5578	PRKCA
155971	Envelope surface glycoprotein gp120	5578	PRKCA
155971	Envelope surface glycoprotein gp120	5578	PRKCA
155971	Envelope surface glycoprotein gp120	5579	PRKCB
155971	Envelope surface glycoprotein gp120	5579	PRKCB
155971	Envelope surface glycoprotein gp120	5579	PRKCB
155971	Envelope surface glycoprotein gp120	5579	PRKCB
155971	Envelope surface glycoprotein gp120	5579	PRKCB
155971	Envelope surface glycoprotein gp120	5580	PRKCD
155971	Envelope surface glycoprotein gp120	5580	PRKCD
155971	Envelope surface glycoprotein gp120	5580	PRKCD
155971	Envelope surface glycoprotein gp120	5580	PRKCD
155971	Envelope surface glycoprotein gp120	5580	PRKCD
155971	Envelope surface glycoprotein gp120	5581	PRKCE
155971	Envelope surface glycoprotein gp120	5581	PRKCE
155971	Envelope surface glycoprotein gp120	5581	PRKCE
155971	Envelope surface glycoprotein gp120	5581	PRKCE
155971	Envelope surface glycoprotein gp120	5581	PRKCE
155971	Envelope surface glycoprotein gp120	5583	PRKCH
155971	Envelope surface glycoprotein gp120	5583	PRKCH
155971	Envelope surface glycoprotein gp120	5583	PRKCH
155971	Envelope surface glycoprotein gp120	5583	PRKCH
155971	Envelope surface glycoprotein gp120	5583	PRKCH
155971	Envelope surface glycoprotein gp120	5582	PRKCG
155971	Envelope surface glycoprotein gp120	5582	PRKCG
155971	Envelope surface glycoprotein gp120	5582	PRKCG
155971	Envelope surface glycoprotein gp120	5582	PRKCG
155971	Envelope surface glycoprotein gp120	5582	PRKCG
155971	Envelope surface glycoprotein gp120	5584	PRKCI
155971	Envelope surface glycoprotein gp120	5584	PRKCI
155971	Envelope surface glycoprotein gp120	5584	PRKCI
155971	Envelope surface glycoprotein gp120	5584	PRKCI
155971	Envelope surface glycoprotein gp120	5584	PRKCI
155971	Envelope surface glycoprotein gp120	5588	PRKCQ
155971	Envelope surface glycoprotein gp120	5588	PRKCQ
[truncated: 16,070 more rows]

## Sheet: HBV interactions
HBV gene	Human gene	Human Entrez ID
X protein	CDK2	1017
X protein	CDK4	1019
X protein	CDKN1A	1026
X protein	CDKN1A	1026
core protein	CDKN1A	1026
X protein	CDKN2A	1029
X protein	CDKN2A	1029
X protein	HBXIP	10542
X protein	HBXIP	10542
X protein	HBXIP	10542
X protein	CHEK1	1111
X protein	CHUK	1147
core protein	CCR5	1234
X protein	COL1A1	1277
X protein	CREB1	1385
X protein	CREB1	1385
X protein	CREB1	1385
X protein	CREB1	1385
X protein	CREB1	1385
X protein	CREB1	1385
X protein	CREB1	1385
X protein	ATF2	1386
X protein	CREM	1390
X protein	CSNK2A1	1457
X protein	ZFP90	146198
X protein	CTGF	1490
X protein	CTNNB1	1499
S protein	DBI	1622
X protein	DDB1	1642
X protein	DDB1	1642
X protein	DDB1	1642
X protein	DDB1	1642
X protein	DDB1	1642
X protein	DDB1	1642
X protein	DDB1	1642
X protein	DDB1	1642
X protein	DDB1	1642
X protein	DDB1	1642
X protein	DDB1	1642
X protein	DDB1	1642
X protein	DDB1	1642
X protein	DDB1	1642
X protein	DDB2	1643
X protein	DDB2	1643
X protein	DDB2	1643
X protein	DDB2	1643
X protein	DNMT1	1786
X protein	DNMT3A	1788
X protein	DNMT3A	1788
X protein	DNMT3A	1788
X protein	DNMT3A	1788
X protein	JAG1	182
X protein	E2F1	1869
core protein	E2F1	1869
X protein	E2F1	1869
X protein	E2F1	1869
X protein	E2F1	1869
X protein	E2F1	1869
X protein	E2F1	1869
core protein	EEF2	1938
X protein	ELK1	2002
X protein	ERCC2	2068
X protein	ERCC2	2068
X protein	ERCC2	2068
X protein	AKT1	207
X protein	ERCC3	2071
X protein	ERCC3	2071
X protein	ERCC3	2071
X protein	ERCC3	2071
X protein	ERCC3	2071
X protein	ERN1	2081
S protein	ALB	213
X protein	FANCD2	2177
X protein	VWCE	220001
X protein	FGB	2244
X protein	ATF6	22926
X protein	FOXM1	2305
X protein	FLT4	2324
X protein	FOS	2353
S protein	BHMT2	23743
core protein	GAPDH	2597
X protein	FETUB	26998
X protein	SGSM3	27352
X protein	SGSM3	27352
X protein	SGSM3	27352
X protein	ANGPT2	285
X protein	GSK3B	2932
X protein	MSH6	2956
X protein	GTF2B	2959
X protein	GTF2B	2959
X protein	GTF2B	2959
X protein	GTF2B	2959
X protein	GTF2B	2959
X protein	GTF2B	2959
X protein	GTF2B	2959
X protein	GTF2B	2959
X protein	HDAC1	3065
X protein	HDAC1	3065
X protein	HDAC1	3065
X protein	HDAC1	3065
X protein	HDAC2	3066
X protein	HIF1A	3091
core protein	HMOX1	3162
X protein	HNF4A	3172
X protein	HSPA1A	3303
L protein	HSPA5	3309
X protein	DNAJB1	3337
X protein	ID1	3397
P protein	IFNA1	3439
X protein	IFNA1	3439
core protein	IFNA1	3439
X protein	IFNA1	3439
X protein	IGF1R	3480
X protein	IGFBP3	3486
X protein	FAS	355
X protein	IL1B	3553
X protein	IL2	3558
X protein	FASLG	356
X protein	IL5	3567
X protein	IL6	3569
X protein	IL6	3569
X protein	IL6	3569
X protein	IL10	3586
X protein	IL18	3606
X protein	IL18	3606
X protein	INSL3	3640
X protein	AR	367
X protein	JUN	3725
X protein	JUN	3725
X protein	JUN	3725
X protein	JUN	3725
X protein	MAZ	4150
X protein	MDM2	4193
X protein	MAP3K1	4214
X protein	MAP3K1	4214
X protein	MIF	4282
X protein	MMP2	4313
X protein	MMP3	4314
X protein	MMP9	4318
X protein	MMP9	4318
S protein	MT2A	4502
X protein	MYC	4609
P protein	MYD88	4615
X protein	SERPINC1	462
X protein	MYOD1	4654
X protein	ATF3	467
X protein	NFATC2	4773
X protein	NFKB1	4790
X protein	NFKB1	4790
X protein	NFKB1	4790
core protein	NFKB1	4790
X protein	NFKB1	4790
X protein	NFKBIA	4792
X protein	ACO1	48
core protein	POLG	5428
X protein	POLR2E	5434
X protein	POLR2E	5434
X protein	POLR2E	5434
X protein	POLR2E	5434
X protein	POLR2E	5434
X protein	POLR2E	5434
X protein	POLR2E	5434
X protein	POLR2E	5434
X protein	UGT1A9	54600
X protein	PPARG	5468
X protein	PPP2CA	5515
core protein	PRKAR1A	5573
core protein	PRKAR2A	5576
X protein	MAPK1	5594
X protein	MAPK8	5599
X protein	MAPK8	5599
X protein	MAPK8	5599
X protein	MAPK8	5599
X protein	MAPK8	5599
X protein	MAPK8	5599
X protein	MAPK8	5599
X protein	MAPK8	5599
X protein	MAPK8	5599
X protein	MAPK9	5601
X protein	MAPK9	5601
X protein	PSMA7	5688
X protein	PSMA7	5688
X protein	PSMA7	5688
X protein	PSMA7	5688
X protein	PSMA7	5688
X protein	PSMA7	5688
X protein	PSMC1	5700
X protein	PSMC1	5700
X protein	PSMC1	5700
X protein	PTEN	5728
X protein	PTEN	5728
X protein	PTEN	5728
X protein	PTGS2	5743
X protein	PTK2	5747
core protein	PTPN3	5774
X protein	BAX	581
X protein	RAD52	5893
X protein	CCND1	595
X protein	RXRA	6256
X protein	SDC4	6385
X protein	MAP2K4	6416
X protein	SMYD3	64754
core protein	MRPL41	64975
X protein	SKP2	6502
X protein	SP1	6667
X protein	SRC	6714
X protein	SREBF1	6720
X protein	SREBF1	6720
X protein	SRF	6722
core protein	SRPK1	6732
core protein	SRPK1	6732
core protein	SRPK2	6733
core protein	SRPK2	6733
P protein	STAT1	6772
X protein	STAT3	6774
X protein	STAT3	6774
X protein	STAT5B	6777
X protein	TERT	7015
X protein	TGFB1	7040
X protein	TM4SF4	7104
X protein	TNF	7124
X protein	TNFRSF1A	7132
X protein	TP53	7157
X protein	TP53	7157
core protein	TP53	7157
X protein	TP53	7157
P protein	HSP90B1	7184
P protein	HSP90B1	7184
X protein	VBP1	7411
X protein	VEGFA	7422
X protein	VEGFA	7422
X protein	WNT5A	7474
X protein	XBP1	7494
S protein	SLC25A23	79085
S protein	CALR	811
X protein	CASP3	836
X protein	ACTN1	87
X protein	TPSB2	64499
X protein	TPSB2	64499
X protein	TNFSF10	8743
X protein	FADD	8772
core protein	TNFRSF10B	8795
X protein	CCNB1	891
X protein	AIP	9049
X protein	MTA1	9112
X protein	CYP7B1	9420
X protein	MPDU1	9526
X protein	CD44	960
P protein	ISG15	9636
S protein	CD81	975

## Sheet: HCV interactions
HCV gene	Human gene	Human Entrez ID
CORE	LTBR	4055
CORE	APOA2	336
CORE	TP53	7157
CORE	LTBR	4055
CORE	HNRNPK	3190
CORE	CORE	951475
CORE	DDX3X	1654
CORE	DDX3X	1654
CORE	DDX3X	1654
CORE	APOA2	336
CORE	TP53	7157
CORE	YWHAB	7529
CORE	YWHAZ	7534
CORE	CREB3	10488
CORE	CORE	951475
CORE	CDKN1A	1026
CORE	TAF11	6882
CORE	TP53	7157
CORE	C1QBP	708
CORE	TNFRSF1A	7132
CORE	FADD	8772
CORE	TNF	7124
CORE	TRADD	8717
CORE	TRAF2	7186
CORE	RXRA	6256
CORE	STAT3	6774
CORE	TSN	7247
CORE	FUNDC2	65991
CORE	TP73	7161
CORE	TP53	7157
CORE	JAK1	3716
CORE	JAK2	3717
CORE	FAS	355
CORE	CCNH	902
CORE	TBP	6908
CORE	TP53BP2	7159
CORE	SMAD3	4088
CORE	EP300	2033
CORE	CREBBP	1387
CORE	TLR2	7097
CORE	HLA-A	3105
CORE	HLA-E	3133
CORE	STAT1	6772
CORE	ACP1	52
CORE	CFL1	1072
CORE	FKBP7	51661
CORE	HSPD1	3329
CORE	KRT18	3875
CORE	KRT19	3880
CORE	KRT8	3856
CORE	SLC22A7	10864
CORE	TATDN1	83940
CORE	GLRX3	10539
CORE	VIM	7431
CORE	NPM1	4869
CORE	YY1	7528
CORE	PML	5371
CORE	DICER1	23405
CORE	PSME3	10197
CORE	DICER1	23405
CORE	AGRN	375790
CORE	BCAR1	9564
CORE	CD68	968
CORE	COL4A2	1284
CORE	DDX3Y	8653
CORE	EGFL7	51162
CORE	FBLN2	2199
CORE	FBLN5	10516
CORE	GAPDH	2597
CORE	GRN	2896
CORE	HIVEP2	3097
CORE	HOXD8	3234
CORE	LPXN	9404
CORE	LRRTM1	347730
CORE	LTBP4	8425
CORE	MAGED1	9500
CORE	MEGF6	1953
CORE	MMRN2	79812
CORE	NR4A1	3164
CORE	PABPN1	8106
CORE	PAK4	10298
CORE	PLSCR1	5359
CORE	RNF31	55072
CORE	SETD2	29072
CORE	SLC31A2	1318
CORE	VWF	7450
CORE	ZNF271	10778
CORE	YWHAE	7531
CORE	NS5A	951475
CORE	NS5B	951475
CORE	RSF1	51773
CORE	E1	951475
CORE	SP110	3431
CORE	KPNA1	3836
CORE	DDX5	1655
CORE	NS5A	951475
CORE	EIF2AK2	5610
CORE	PPARA	5465
CORE	ACY3	91703
CORE	MCL1	4170
CORE	CORE	951475
CORE	CORE	951475
E1	E2	951475
E1	CORE	951475
E1	LTF	4057
E1	CALR	811
E1	CANX	821
E1	HSPA5	3309
E1	E2	951475
E1	E2	951475
E1	CD209	30835
E1	CLEC4M	10332
E1	E2	951475
E1	CD209	30835
E1	JUN	3725
E1	NR4A1	3164
E1	PFN1	5216
E1	SETD2	29072
E1	TMSB4X	7114
E1	NS5A	951475
E1	E2	951475
E2	LTF	4057
E2	CALR	811
E2	CANX	821
E2	HSPA5	3309
E2	EIF2AK2	5610
E2	NS3	951475
E2	CD81	975
E2	CD81	975
E2	SCARB1	949
E2	CD81	975
E2	LTF	4057
E2	TF	7018
E2	CD81	975
E2	EIF2AK3	9451
E2	CD209	30835
E2	CLEC4M	10332
E2	SDC2	6383
E2	CD209	30835
E2	HOXD8	3234
E2	ITGB1	3688
E2	FAM135A	57579
E2	NR4A1	3164
E2	PSMA6	5687
E2	SETD2	29072
E2	SMEK2	57223
F	C14orf135	64430
F	ZNF83	55769
F	PFDN2	5202
F	PFDN5	5204
F	AGT	183
F	AZGP1	563
F	CTSB	1508
F	MPDU1	9526
F	RAB14	51552
F	SERPINC1	462
F	ST3GAL1	6482
F	vitronectin	7448
F	ZG16	653808
NS2	NS4A	951475
NS2	NS3	951475
NS2	CIDEB	27141
NS2	NS4B	951475
NS2	NS4A	951475
NS2	NS5B	951475
NS2	NS2	951475
NS2	NS3	951475
NS2	C7	730
NS2	FBLN5	10516
NS2	HOXD8	3234
NS2	NR4A1	3164
NS2	POU3F2	5454
NS2	SETD2	29072
NS2	TRIM27	5987
NS2	NS5A	951475
NS3	NS4A	951475
NS3	MBP	4155
NS3	PRM1	5619
NS3	HIST4H4	121504
NS3	HIST3H2BB	128312
NS3	PRKACA	5566
NS3	PRKACA	5566
NS3	NS3	951475
NS3	TP53	7157
NS3	NS4A	951475
NS3	NS4A	951475
NS3	HIST3H2BB	128312
NS3	HIST4H4	121504
NS3	SERPINF2	5345
NS3	SERPING1	710
NS3	NS4A	951475
NS3	PRMT5	10419
NS3	PRMT1	3276
NS3	NS3	951475
NS3	NS4B	951475
NS3	NS4A	951475
NS3	NS3	951475
NS3	IRF3	3661
NS3	SNRPD1	6632
NS3	NS4A	951475
NS3	NS4A	951475
NS3	PSMB8	5696
NS3	SMAD3	4088
NS3	NS4A	951475
NS3	TLR2	7097
NS3	TICAM1	148022
NS3	PTBP2	58155
NS3	IKBKE	9641
NS3	TBK1	29110
NS3	ERC1	23085
NS3	NS4A	951475
NS3	NS4A	951475
NS3	NS4A	951475
NS3	NS4A	951475
NS3	VISA	57506
NS3	NS5B	951475
NS3	ACTN1	87
NS3	ACTN2	88
NS3	AEBP1	165
NS3	ANKRD12	23253
NS3	ANKRD28	23243
NS3	ARFIP2	23647
NS3	ARHGEF6	9459
NS3	ARNT	405
NS3	ARS2	51593
NS3	ASXL1	171023
NS3	B2M	567
NS3	BCAN	63827
NS3	BCKDK	10295
NS3	BCL2A1	597
NS3	BCL6	604
NS3	BZRAP1	9256
NS3	C10orf18	54906
NS3	C10orf6	55719
NS3	C12orf41	54934
NS3	INF2	64423
NS3	C16orf7	9605
NS3	BEND5	79656
NS3	C1orf94	84970
NS3	C9orf30	91283
NS3	CALCOCO2	10241
NS3	CBY1	25776
NS3	CCDC21	64793
NS3	CCDC37	348807
NS3	CCDC52	152185
NS3	CCDC66	285331
NS3	INO80E	283899
NS3	CCHCR1	54535
NS3	CD5L	922
NS3	CDC23	8697
NS3	CELSR2	1952
NS3	CEP152	22995
NS3	CEP192	55125
NS3	CFP	5199
NS3	CHPF	79586
NS3	CORO1B	57175
NS3	CSNK2B	1460
NS3	CTGF	1490
NS3	ALG13	79868
NS3	DEAF1	10522
NS3	DES	1674
NS3	DLAT	1737
NS3	DOCK7	85440
NS3	DPF1	8193
NS3	DPP7	29952
NS3	EEF1A1	1915
NS3	EFEMP1	2202
NS3	EFEMP2	30008
NS3	EIF1	10209
NS3	EIF4ENIF1	56478
NS3	FAM120B	84498
NS3	FAM65A	79567
NS3	FBF1	85302
NS3	FBLN1	2192
NS3	FBLN2	2199
NS3	FBLN5	10516
NS3	FBN1	2200
NS3	FBN3	84467
NS3	FES	2242
NS3	FIGNL1	63979
NS3	FLAD1	80308
NS3	C19orf66	55337
NS3	FN1	2335
NS3	FRMPD4	9758
NS3	FRS3	10817
NS3	FTH1	2495
NS3	FUCA2	2519
NS3	GAA	2548
NS3	GBP2	2634
NS3	GFAP	2670
NS3	GNB2	2783
NS3	GON4L	54856
NS3	HIVEP2	3097
NS3	HNRNPK	3190
NS3	HOMER3	9454
NS3	IQWD1	55827
NS3	ITGB4	3691
NS3	JAG2	3714
NS3	JUN	3725
NS3	KHDRBS1	10657
NS3	KIAA1549	57670
NS3	KIF17	57576
NS3	KIF7	374654
NS3	KPNA1	3836
NS3	L3MBTL3	84456
NS3	LAMA5	3911
NS3	LAMB2	3913
NS3	LAMC3	10319
NS3	LDB1	8861
NS3	LRRC7	57554
NS3	LRRCC1	85444
NS3	LTBP4	8425
NS3	LZTS2	84445
NS3	MAGED1	9500
NS3	MAPK7	5598
NS3	MEGF8	1954
NS3	MLLT4	4301
NS3	MLXIP	22877
NS3	MORC4	79710
NS3	MORF4L1	10933
NS3	MVP	9961
NS3	NAP1L1	4673
NS3	NAP1L2	4674
NS3	NCAN	1463
NS3	NDC80	10403
NS3	NEFL	4747
NS3	NEFM	4741
NS3	NELL1	4745
NS3	NELL2	4753
NS3	NID1	4811
NS3	NID2	22795
NS3	NOTCH1	4851
NS3	N-PAC	84656
NS3	NUP62	23636
NS3	OBSCN	84033
NS3	PARP4	143
NS3	PCYT2	5833
NS3	PDE4DIP	9659
NS3	PDLIM5	10611
NS3	PICK1	9463
NS3	PKNOX1	5316
NS3	PLEKHG4	25894
NS3	PNPLA8	50640
NS3	PRRC1	133619
NS3	PSMB9	5698
NS3	PSME3	10197
NS3	PTPRN2	5799
NS3	RABEP1	9135
NS3	RAI14	26064
NS3	RASAL2	9462
NS3	RBM4	5936
NS3	RCN3	57333
NS3	RGNEF	64283
NS3	RICS	9743
NS3	RINT1	60561
NS3	RNF31	55072
NS3	ROGDI	79641
NS3	KIAA2022	340533
NS3	RUSC2	9853
NS3	SBF1	6305
NS3	SDCCAG8	10806
NS3	SECISBP2	79048
NS3	2021-09-10	151011
NS3	SERTAD1	29950
NS3	SESTD1	91404
NS3	SF3B2	10992
NS3	SIAH1	6477
NS3	SLIT1	6585
NS3	SLIT2	9353
NS3	SLIT3	6586
NS3	SMURF2	64750
NS3	SNX4	8723
NS3	SPOCK3	50859
NS3	SPON1	10418
NS3	SRPX2	27286
NS3	SSX2IP	117178
NS3	STAB1	23166
NS3	STAT3	6774
NS3	SVEP1	79987
NS3	SYNE1	23345
NS3	SYNPO2	171024
NS3	TAF1	6872
NS3	TBC1D2B	23102
NS3	TBXAS1	6916
NS3	TGFB1I1	7041
NS3	THAP1	55145
NS3	TMEM63B	55362
NS3	TRIM23	373
NS3	TRIM27	5987
NS3	TRIO	7204
NS3	TRIP11	9321
NS3	TXNDC11	51061
NS3	UBA3	9039
NS3	USHBP1	83878
NS3	UXT	8409
NS3	VCAN	1462
NS3	VIM	7431
NS3	VWF	7450
NS3	XAB2	56949
NS3	XRN2	22803
NS3	YY1AP1	55249
NS3	ZBTB1	22890
NS3	ZCCHC7	84186
NS3	ZHX3	23051
NS3	ZMYM2	7750
NS3	ZNF281	23528
NS3	ZNF410	57862
NS3	ZZZ3	26009
NS3	NS5B	951475
NS3	NS3	951475
NS3	NS5B	951475
NS3	NS4B	951475
NS3	NS5B	951475
NS3	CASP8	841
NS3	NS3	951475
NS3	NS4A	951475
NS3	RSPH3	83861
NS4A	NS3	951475
NS4A	NS3	951475
NS4A	NS3	951475
NS4A	NS3	951475
NS4A	NS4A	951475
NS4A	NS4B	951475
NS4A	NS5B	951475
NS4A	CREB3	10488
NS4A	ELAC2	60528
NS4A	HOXD8	3234
NS4A	NR4A1	3164
NS4A	TRAF3IP3	80342
NS4A	UBQLN1	29979
NS4A	NS5A	951475
NS4A	MT2A	4502
NS4A	TUT1	64852
NS4A	MT-CO2	4513
NS4A	EEF1A1	1915
NS4A	CAMLG	819
NS4A	NS5A	951475
NS4B	NS4A	951475
NS4B	ATF6B	1388
NS4B	ATF6A	22926
NS4B	NS5B	951475
NS4B	NS4B	951475
NS4B	NS5B	951475
NS4B	TNXB	7148
NS4B	NS5A	951475
NS4B	NS5A	951475
NS4B	RTN3	10313
NS4B	RBP4	5950
NS4B	NDUFV3	4731
NS4B	FGG	2266
NS4B	MT-CO3	4514
NS4B	RAB5A	5868
NS5A	EIF2AK2	5610
NS5A	CSNK2A1	1457
NS5A	GRB2	2885
NS5A	VAPA	9218
NS5A	SRCAP	10847
NS5A	IPO5	3843
NS5A	TP53	7157
NS5A	CDC2	983
NS5A	CDK2	1017
NS5A	APOA1	335
NS5A	TP53	7157
NS5A	TAF9	6880
NS5A	PIK3R1	5295
NS5A	TP53	7157
NS5A	TBP	6908
NS5A	BIN1	274
NS5A	PITX1	5307
NS5A	NS5B	951475
NS5A	NS5A	951475
NS5A	BAX	581
NS5A	SSB	6741
NS5A	HCK	3055
NS5A	LCK	3932
NS5A	LYN	4067
NS5A	FYN	2534
NS5A	VAPA	9218
NS5A	OAS1	4938
NS5A	JAK1	3716
NS5A	APOE	348
NS5A	VAPA	9218
NS5A	NS5A	951475
NS5A	AHNAK	79026
NS5A	SFRP4	6424
NS5A	CRABP1	1381
NS5A	FTH1	2495
NS5A	CCDC86	79080
NS5A	TACSTD2	4070
NS5A	PI4KA	5297
NS5A	PTMA	5757
NS5A	ARAP1	116985
NS5A	NDRG1	10397
NS5A	MGP	4256
NS5A	CEP57	9702
NS5A	C9orf6	54942
NS5A	FBXL2	25827
NS5A	NS5A	951475
NS5A	CSK	1445
NS5A	SRC	6714
NS5A	APOB	338
NS5A	VAPB	9217
NS5A	RAF1	5894
NS5A	TGFBR1	7046
NS5A	PPP2R4	5524
NS5A	BIN1	274
NS5A	TRAF2	7186
NS5A	FKBP8	23770
NS5A	FKBP8	23770
NS5A	HSP90AA1	3320
NS5A	PTPLAD1	51495
NS5A	ACLY	47
NS5A	ARFIP1	27236
NS5A	AXIN1	8312
NS5A	BEND7	222389
NS5A	CADPS	8618
NS5A	CADPS2	93664
NS5A	CEP120	153241
NS5A	CENPC1	1060
NS5A	CEP250	11190
NS5A	CEP63	80254
NS5A	DNAJA3	9093
NS5A	EFEMP1	2202
NS5A	FHL2	2274
NS5A	GOLGA2	2801
NS5A	GPS2	2874
NS5A	IGLL1	3543
NS5A	ITGAL	3683
NS5A	LIMS2	55679
NS5A	MOBK1B	55233
NS5A	NAP1L1	4673
NS5A	NAP1L2	4674
NS5A	NFE2	4778
NS5A	NUCB1	4924
NS5A	PARVG	64098
NS5A	PMVK	10654
NS5A	PPP1R13L	10848
NS5A	PSMB9	5698
NS5A	RPL18A	6142
NS5A	RRBP1	6238
NS5A	SHARPIN	81858
NS5A	SMYD3	64754
NS5A	SORBS2	8470
NS5A	SORBS3	10174
NS5A	THBS1	7057
NS5A	TMF1	7110
NS5A	TP53BP2	7159
NS5A	TRIOBP	11078
NS5A	TXNDC11	51061
NS5A	UBASH3A	53347
NS5A	USP19	10869
NS5A	VPS52	6293
NS5A	GIN1	54826
NS5A	ZNF646	9726
NS5A	NS5B	951475
NS5A	TRAF2	7186
NS5A	TRADD	8717
NS5A	GAB1	2549
NS5A	NS3	951475
NS5A	PIK3CB	5291
NS5A	FBXL20	84961
NS5A	STAT1	6772
NS5A	MYD88	4615
NS5A	PDPK1	5170
NS5A	AKT1	207
NS5A	VPS35	55737
NS5A	MAPK12	6300
NS5A	IPO4	79711
NS5A	GSK3B	2932
NS5A	AHSA1	10598
NS5A	GSK3A	2931
NS5A	CDK6	1021
NS5A	TBC1D20	128637
NS5B	VAPA	9218
NS5B	EIF4A2	1974
NS5B	NCL	4691
NS5B	NS5B	951475
NS5B	HAO1	54363
NS5B	TTC4	7268
NS5B	ACTN1	87
NS5B	VAPA	9218
NS5B	DDX5	1655
NS5B	PKN2	5586
NS5B	PTBP2	58155
NS5B	FBXL2	25827
NS5B	PPIB	5479
NS5B	VAPB	9217
NS5B	CHUK	1147
NS5B	CEP250	11190
NS5B	CEP68	23177
NS5B	HOXD8	3234
NS5B	MGC2752	65996
NS5B	MOBK1B	55233
NS5B	NR4A1	3164
NS5B	OS9	10956
NS5B	PKM2	5315
NS5B	PSMB9	5698
NS5B	SETD2	29072
NS5B	SHARPIN	81858
NS5B	TUBB2C	10383
NS5B	NS5B	951475
NS5B	UBQLN1	29979
NS5B	CINP	51550
NS5B	PSMB4	5692
NS5B	2021-09-06	23157
NS5B	HNRNPA1	3178
p7	P7	951475
p7	FMNL1	752
p7	H19	283120
p7	ISLR	3671
p7	MS4A6A	64231
p7	NUP214	8021
p7	SSR4	6748
p7	STRBP	55342
p7	CREB3	10488
p7	FBLN2	2199
p7	FXYD6	53826
p7	LMNB1	4001
p7	SLIT2	9353
p7	UBQLN1	29979
p7	UBQLN4	56893

## Sheet: HPV interactions
HCV gene	Human gene
E1	DLG1
E1	SUMO1
E1	POLA1
E1	PIAS1
E1	TRIP13
E1	SMARCB1
E1	H1F0
E1	UBE2I
E1	PIAS2
E1	IFIT1
E1	WDR48
E1	PELP1
E1	WDR20
E1	CDK1
E1	UBP1
E1	AN32A
E1	RAGP1
E1	CCNB1
E1	ECHA
E1	TEX10
E1	UBP46
E1	AN32B
E1	ECHB
E1	H1T
E1	WDR18
E1	AN32C
E1	DMWD
E1	KEAP1
E1	RFA1
E1	AN32E
E1	SLC9A3R1
E1	MPDZ
E1	PSMC1
E1	PSMC6
E1	UBE2D2
E1	UBE2L3
E1	DLG4
E1	TJP1
E1	PTPN13
E1	IL16
E1	SLC9A3R2
E1	MAGI2
E1	PPP1R9B
E1	H1-1
E1^E4	WDR6
E1^E4	HMGN1
E1^E4	RFA1
E2	POLDIP2
E2	ZNF251
E2	TP53
E2	TEFM
E2	RAB3IP
E2	MGA
E2	CHERP
E2	VPS39
E2	TOB1
E2	SRP68
E2	CEBPA
E2	ZBTB38
E2	GPS2
E2	PLK2
E2	BRD4
E2	EP300
E2	CASP8
E2	TEX10
E2	BTBD2
E2	PMM2
E2	CDIPT
E2	EZH2
E2	NMI
E2	C1QBP
E2	NRBP1
E2	TIPIN
E2	FZR1
E2	WWP2
E2	PPME1
E2	PSMA2
E2	UACA
E2	OAZ1
E2	BCL2L13
E2	GGA1
E2	RSF1
E2	KRT81
E2	SKP2
E2	PTK2B
E2	TAF6
E2	VPS52
E2	KAT7
E2	ARFIP2
E2	BCL2L1
E2	POMP
E2	TMF1
E2	KIF20A
E2	LYST
E2	LCN2
E2	SPOP
E2	NR4A1
E2	BTBD1
E2	TOX4
E2	CDCP1
E2	TOP1
E2	CEBPB
E2	PRPF31
E2	TAF1
E2	AIDA
E2	SLC35B1
E2	SF1
E2	PDIA3
E2	DDX56
E2	PCBP1
E2	TAX1BP1
E2	ENO1
E2	SCYL1
E2	KRT6A
E2	DERL2
E2	ZNF84
E2	AREG
E2	ITGB4
E2	NAP1L1
E2	RACK1
E2	UBA1
E2	SRSF1
E2	HSPB1
E2	BAZ1A
E2	SPTAN1
E2	KAT2B
E2	SMN1
E2	TBP
E2	EIF6
E2	MSRB1
E2	GTF2B
E2	CITED1
E2	CCHCR1
E2	CEP350
E2	MAP1S
E2	NFE2L2
E2	TOPBP1
E2	HOXC9
E2	RUNX2
E2	SRSF7
E2	AP3D1
E2	SPATS2
E2	CDC20
E2	HUWE1
E2	HSPA5
E2	PDIA4
E2	TRUB1
E2	DAXX
E2	NPM1
E2	HNRNPC
E2	RFC4
E2	WDR5
E2	SET
E2	PCBP2
E2	TUBB
E2	EEF1G
E2	HNRNPF
E2	EEF1A1
E2	TUBA1B
E2	DDX39B
E2	BYSL
E2	HSPA8
E2	PABPC1
E2	XRCC6
E2	PRPF6
E2	MATR3
E2	HNRNPU
E2	SF3A1
E2	USP11
E2	XRN2
E2	SF3B1
E2	DHX9
E2	BNC2
E2	SUGP2
E2	ADNP
E2	SNRPD1
E2	SNRPD2
E2	SNRPD3
E2	SF3B6
E2	SRP14
E2	BUD31
E2	NCBP2
E2	MAGOH
E2	SAP18
E2	PPIH
E2	PPIL3
E2	PPIL1
E2	SRSF3
E2	RBM8A
E2	CFAP20
E2	SNRPB2
E2	SNRPB
E2	SNRPA1
E2	CXorf56
E2	THOC6
E2	TRA2B
E2	ISY1
E2	ACTB
E2	EIF4A3
E2	SRSF6
E2	RNPS1
E2	TUBA1C
E2	VIM
E2	PRPF19
E2	PLRG1
E2	SF3A3
E2	SF3A2
E2	PUF60
E2	SNW1
E2	DDX17
E2	DDX41
E2	DHX15
E2	HNRNPM
E2	NCBP1
E2	IK
E2	SRPK1
E2	THOC1
E2	CRNKL1
E2	ACIN1
E2	SRPK2
E2	ZCCHC8
E2	CDC5L
E2	PNN
E2	TRIM28
E2	XAB2
E2	SKIV2L2
E2	EFTUD2
E2	SF3B3
E2	PAXBP1
E2	SMARCA1
E2	SF3B2
E2	THRAP3
E2	ZC3H18
E2	DHX8
E2	DHX38
E2	AQR
E2	SNRNP200
E2	PRPF8
E2	RPLP2
E2	RPL35A
E2	RPL30
E2	UBR5
E2	GKAP1
E2	CCHCR
E2	1433G
E2	PNMA2
E2	CSK21
E2	RUVB2
E2	LIPA1
E2	HIST1H2AG
E2	RPS19
E2	RPL34
E2	RPS16
E2	RPS23
E2	HIST1H2BC
E2	RPL31
E2	MRPS25
E2	RPS17
E2	RPL28
E2	RPL12
E2	RPS11
E2	RPS15
E2	RPS24
E2	RPL32
E2	RPS10
E2	RPL26
E2	RPL27A
E2	RPL13
E2	RPL14
E2	H1FX
E2	SNRPA
E2	HIST1H1E
E2	RPL7
E2	RPL5
E2	EXOSC7
E2	E2F6
E2	DNAJC9
E2	TFPT
E2	RFC5
E2	RPL6
E2	RPLP0
E2	RFC2
E2	RFC3
E2	HSU53209
E2	UCHL5
E2	ACTL6A
E2	NR2F1
E2	RPL4
E2	YBX1
E2	SMARCB1
E2	KRR1
E2	WDR18
E2	INO80B
E2	RUVBL2
E2	RUVBL1
E2	GTF3C5
E2	CDYL
E2	RBBP5
E2	RBM39
E2	DDX3X
E2	ACTR8
E2	MTA2
E2	HP1BP3
E2	PATZ1
E2	ASH2L
E2	MTA1
E2	NOL9
E2	NKRF
E2	KDM1B
E2	BAP1
E2	WHSC1L1
E2	GTF3C4
E2	LAS1L
E2	NOP2
E2	CTCF
E2	GTF3C2
E2	DDX24
E2	KIF11
E2	GTF2I
E2	INO80D
E2	BCLAF1
E2	ZFR
E2	SMC6
E2	UBE2O
E2	BAZ1B
E2	INO80
E2	SMARCA2
E2	SMARCA4
E2	ASXL2
E2	PBRM1
E2	PSMD4
E2	GTF3C1
E2	CHD4
E2	NUMA1
E2	BAZ2A
E2	ANKRD17
E2	RIF1
E2	PRKDC
E2	TRRAP
E2	APCS
E2	PARP1
E2	RBM25
E2	SRRT
E2	RPS3
E2	TMPO
E2	SPIN1
E2	HNRNPA1
E2	PPP2CA
E2	YY1
E2	CTNB1
E2	APC
E2	PDIP2
E2	PCM1
E2	FGFR1
E2	FGFR2
E2	FGFR3
E2	FGFR4
E2	NM1
E2	FANCD2
E2	KPNA3
E2	APAF1
E2	TRIM24
E2	TP73
E2	CFLAR
E2	PRPF4
E2	STRN
E2	TBL1X
E2	NR3C1
E2	PGR
E2	SP1
E2	NR3C2
E2	HOXC4
E2	AR
E2	RARA
E2	THRA
E2	THRB
E2	RXRA
E2	PPARG
E2	PAFAH1B1
E2	NR2C2
E2	COPB1
E2	COPA
E2	GNB1
E2	GNB2
E2	UBE2I
E2	MDM2
E2	TLE1
E2	KHDRBS1
E2	PPARA
E2	BPTF
E2	SRSF5
E2	NR5A1
E2	CREBBP
E2	KAT2A
E2	FBXW7
E2	DDX11
E2	EP400
E2	PITX2
E2	TBL1XR1
E2	BAZ2B
E2	FBXW11
E2	BTRC
E2	KPNA2
E2	HNRNPK
E2	STK38
E2	MRPL47
E2	PRMT5
E2	RPS9
E2	RPL23A
E2	ICT1
E2	LBR
E2	MRPL40
E2	MRPL11
E2	MRPL24
E2	ELAVL1
E2	MRPL4
E2	MRPL1
E2	MRPL44
E2	MRPL15
E2	HNRNPDL
E2	RPSA
E2	HNRNPA2B1
E2	HNRNPH3
E2	MRPL39
E2	RALY
E2	HNRNPA3
E2	HNRNPAB
E2	WDR77
E2	GTPBP10
E2	CSNK2A2
E2	ILF2
E2	MRPS27
E2	MRPL37
E2	RBMX
E2	HNRNPD
E2	MRPL38
E2	HNRNPH1
E2	LUC7L2
E2	ATP5A1
E2	C11orf84
E2	U2AF2
E2	HNRNPL
E2	HDAC1
E2	DMAP1
E2	NOP58
E2	SYNCRIP
E2	HSPA9
E2	ZNF326
E2	ILF3
E2	HNRNPUL2
E2	DDX21
E2	GTF3C3
E2	BRCA1
E2	CDC20
E2	CFLAR
E2	CPSF4
E2	CUL3
E2	EIF6
E2	GNB2L1
E2	KDM5C
E2	PLK1
E2	SFRS1
E2	SFRS2
E2	SFRS7
E2	SKP2
E2	SNRNP70
E2	TAF7
E2	TRA2B
E2	TRAF5
E2	TRAF6
E2	TNPO3
E2	CDH1
E2	CFLAR
E2	EIF6
E2	GNB2L1
E2	GPS2
E2	hSNF5
E2	PARP
E2	PCAF
E2	SKP2
E2	SFRS10
E2	SMCX
E2	GRIP1
E2	PLAGL1
E4	HBA1;
E4	SRPK1
E4	KRT7
E4	KRT18
E4	CDK1
E4	CDK4
E4	CDK2
E4	MAPK3
E4	MAPK1
E4	MAPK8
E4	CLK1
E4	CLK2
E4	CDK7
E4	SRPK2
E4	CDK6
E4	CDK5
E4	PRPF4B
E4	MYLK
E4	MAPK14
E4	HIPK2
E4	CLK4
E5	TMEM161A
E5	TECR
E5	SLC7A5
E5	SLC12A4
E5	TMED10
E5	TMEM55A
E5	DDOST
E5	YIPF3
E5	TAP2
E5	RAB18
E5	SSR3
E5	TAP1
E5	ICMT
E5	RHOT1
E5	MTCH2
E5	TRPV2
E5	ABHD12
E5	IFITM3
E5	PTTG1IP
E5	SACM1L
E5	ADCY6
E5	TRAM1
E5	STOML2
E5	AMFR
E5	TRPA1
E5	PCDH1
E5	PREB
E5	CD47
E5	SLC16A3
E5	MPZL1
E5	CDS2
E5	SEC11A
E5	SLC16A4
E5	TM9SF1
E5	MICAL2
E5	MGST1
E5	SLC35B2
E5	ERLIN2
E5	SLC2A1
E5	SLC15A4
E5	MBOAT7
E5	GPAA1
E5	ADGRA2
E5	SELENON
E5	SRPRB
E5	QPCTL
E5	ENDOD1
E5	SLC35A2
E5	COPA
E5	NDUFB1
E5	TNPO1
E5	S1PR3
E5	PLPP6
E5	SLC35E1
E5	SEC22B
E5	DERL2
E5	VKORC1
E5	IPO5
E5	ERLIN1
E5	GALNT1
E5	PNPLA6
E5	PDGFRB
E5	AHNAK
E5	ADGRG1
E5	ATP5L
E5	ATP13A3
E5	ABCC4
E5	SVIP
E5	SYNGR1
E5	PLIN3
E5	PRAF2
E5	SEC63
E5	TMEM126A
E5	CPT1A
E5	ITGB1
E5	STT3A
E5	FAM8A1
E5	CDIPT
E5	PLXNB2
E5	YIPF4
E5	KDSR
E5	RABAC1
E5	HSD17B2
E5	SCD
E5	APOB
E5	ABCD1
E5	ATP2C1
E5	CLU
E5	UNC93B1
E5	SCAMP2
E5	ASPH
E5	TMCO1
E5	SEC61B
E5	MT-CO2
E5	BDKRB2
E5	STOM
E5	ALG1
E5	DAD1
E5	OXTR
E5	ATP5C1
E5	QSOX1
E5	NDUFA4
E5	SCAMP3
E5	FAS
E5	NDUFS1
E5	SFXN3
E5	HMOX2
E5	TMEM120A
E5	ADAM9
E5	TMEM33
E5	PGRMC2
E5	MYOF
E5	FAF2
E5	ATP13A1
E5	RAB34
E5	TMEM109
E5	ATP9A
E5	TOR4A
E5	FZD7
E5	FKBP8
E5	GGT7
E5	PTDSS2
E5	ABHD16A
E5	CAV1
E5	GLIPR1
E5	CLPTM1
E5	ATP1A1
E5	HLA-B
E5	STX4
E5	RPN2
E5	ANO10
E5	RPL13A
E5	SLC4A2
E5	DNAJC11
E5	MMP14
E5	TMEM184C
E5	DNAJB12
E5	ABCC1
E5	FZD6
E5	BCL2L13
E5	RPL21
E5	EGFR
E5	ERBB2
E5	MT-ATP6
E5	GPRC5B
E5	FADS2
E5	PSEN2
E5	MTCH1
E5	SIDT2
E5	PIGU
E5	RMDN3
E5	EMC2
E5	CANX
E5	EMD
E5	FZD2
E5	TMEM165
E5	GPR176
E5	MOGS
E5	LAMTOR1
E5	SLC1A5
E5	TAPBP
E5	RDH11
E5	SCN9A
E5	HSD17B12
E5	SERINC1
E5	SEC62
E5	REEP5
E5	HM13
E5	OSTC
E5	TMPO
E5	ABCD3
E5	SLC30A1
E5	MAVS
E5	RFTN1
E5	IKBIP
E5	ATL3
E5	VEZT
E5	SLC38A10
E5	LNP
E5	CEPT1
E5	IMMT
E5	ATP2A2
E5	TMEM179B
E5	BCAP31
E5	CREB3
E5	PLD3
E5	HACD3
E5	TMEM175
E5	TRPV4
E5	GPX8
E5	PON2
E5	SLC30A7
E5	RPS27L
E5	ATP5F1
E5	COX15
E5	APMAP
E5	TM9SF3
E5	GCN1
E5	LAPTM4A
E5	TBL2
E5	VAPA
E5	TMEM158
E5	MLEC
E5	PIEZO1
E5	ARV1
E5	GOLT1B
E5	FATE1
E5	SPNS1
E5	SCAMP4
E5	MRGPRF
E5	CDKAL1
E5	PBXIP1
E5	STT3B
E5	MPV17L2
E5	YIF1B
E5	PIGG
E5	RABL3
E5	PIGO
E5	DHRS7
E5	TMEM35A
E5	COX20
E5	WLS
E5	CD44
E5	SGPL1
E5	RTN4
E5	ERGIC1
E5	PIGT
E5	SURF4
E5	TMEM43
E5	RFT1
E5	TMEM259
E5	ANO6
E5	KIAA2013
E5	THEM6
E5	SSR4
E5	SCFD1
E5	ERLEC1
E5	PKD2
E5	ESYT2
E5	PTRH2
E5	LPAR1
E5	PIGK
E5	DNAJC16
E5	COMT
E5	CHRM2
E5	S100A16
E5	DHCR24
E5	SARAF
E5	ATP5J
E5	SLC22A18
E5	TMCO3
E5	TMEM205
E5	PHB2
E5	SLC3A2
E5	TMPPE
E5	CLCC1
E5	CSPG4
E5	TBXA2R
E5	SLC30A9
E5	TMX2
E5	RAP1A
E5	PDIA3
E5	F2R
E5	ATP2B4
E5	UBAC2
E5	S100A13
E5	IGF2R
E5	ATP5O
E5	SERPINE2
E5	FITM2
E5	PIGS
E5	MXRA7
E5	RNF170
E5	PGRMC1
E5	OCIAD1
E5	KCT2
E5	KCTD12
E5	CSF1R
E5	ATAD1
E5	SRPRA
E5	RER1
E5	HLA-A
E5	PTPN1
E5	ATAD3A
E5	TMX3
E5	SQOR
E5	TNFSF4
E5	CERS2
E5	TMEM38B
E5	NCEH1
E5	PTGS1
E5	USMG5
E5	GJA1
E5	TMEM214
E5	ATP5H
E5	SEC61A1
E5	DIRC2
E5	CAVIN1
E5	SGK1
E5	MAP2K7
E5	CHEK1
E5	TNPO2
E5	IKBKB
E5	AURKA
E5	CHUK
E5	MAP3K7
E5	RIPK2
E5	JAK2
E5	MAP4K4
E5	ABL1
E5	FOS
E5	HLA-DRA
E5	HLA-DRB1
E5	HLA-DPB1
E5	PRKCG
E5	JUN
E5	PRKCB
E5	INSR
E5	LCK
E5	FYN
E5	CDK1
E5	YES1
E5	LYN
E5	RET
E5	FGR
E5	CDK4
E5	SRC
E5	HLA-DRB4
E5	PDGFRA
E5	FER
E5	PRKACA
E5	PLCG1
E5	EIF2AK2
E5	HLA-DPA1
E5	ERBB3
E5	FGFR3
E5	CBL
E5	PRKACB
E5	JAK1
E5	CDK2
E5	MAPK3
E5	ATP6V0C
E5	MAPK1
E5	EPHA2
E5	EPHB2
E5	HLA-F
E5	AXL
E5	PTGS2
E5	KDR
E5	MAP2K2
E5	CDKN1A
E5	CSK
E5	PRKCI
E5	MATK
E5	TEC
E5	ZAP70
E5	SYK
E5	CDKN1B
E5	ATP5PO
E5	GSK3B
E5	CDK7
E5	BLK
E5	NEK2
E5	LIMK1
E5	HLA-DRB3
E5	CDK5
E5	MAP2K1
E5	MAP3K10
E5	PRKCQ
E5	MST1R
E5	PTK2
E5	PRKCZ
E5	PRKCD
E5	BTK
E5	BAX
E5	DDR1
E5	PAK1
E5	MAPK7
E5	PAK2
E5	ILK
E5	PRKG1
E5	PTK2B
E5	PRKD1
E5	ERBB4
E5	RPS6KA1
E5	MYLK
E5	NTRK3
E5	MAPK14
E5	NTRK2
E5	MAPK6
E5	MICB
E5	LRRK2
E5	MAST2
E5	TAOK1
E5	MINK1
E5	NEK9
E5	WNK4
E5	WNK3
E5	PRKD2
E5	TAOK3
E5	NEK6
E5	STK26
E5	TNIK
E5	ALK
E5	MAP3K2
E5	RIPK3
E5	MAP3K4
E5	BAG6
E5	MBRL
E5	DNJB1
E5	CKAP4
E5	DNJC7
E5	RPN1
E5	UBL4A
E5	ATPB
E5	DNJB4
E5	STIP1
E5	F10A1
E5	UBQL4
E5	XPO2
E5	ELOV5
E5	DHCR7
E5	UN45A
E5	CD2A1
E5	CXA1
E5	RN126
E5	VDAC3
E5A	VAPB
E5A	VAPA
E5A	TMEM181
E5A	CANX
E5A	PTDSS2
E5A	ESYT1
E5A	IGF2R
E5A	VKORC1
E5A	MLEC
E5A	COPB2
E5A	TMEM175
E5A	MGST1
E5A	STT3A
E5A	SEC61B
E5A	ATP2C1
E5A	COPA
E5A	RNF170
E5A	VMP1
E5A	SLC38A2
E5A	SLC35A2
E5A	GLIPR1
E5A	CLU
E5A	RAB5C
E5A	SLC2A1
E5A	SERPINE2
E5A	RABL3
E5A	TMEM184C
E5A	YIF1B
E5A	KDELR3
E5A	LNP
E5A	SEC11A
E5A	PIGS
E5A	FAS
E5A	RAP1A
E5A	GJA1
E5A	MMP14
E5A	WLS
E5A	SGTA
E5A	TMEM109
E5A	YIPF3
E5A	ACBD3
E5A	TMEM35A
E5A	TMEM161A
E5A	CHCHD3
E5A	AGK
E5A	CHRM2
E5A	DDOST
E5A	ESYT2
E5A	FAF2
E5A	TRAM1
E5A	ATP1A1
E5A	MXRA8
E5A	HM13
E5A	FAM8A1
E5A	PTTG1IP
E5A	TMPO
E5A	DNAJC16
E5A	CPT1A
E5A	F2R
E5A	DHCR24
E5A	SEC62
E5A	DAD1
E5A	GGCX
E5A	SCN9A
E5A	GPR176
E5A	ARL1
E5A	LOX
E5A	HMOX2
E5A	SLC1A5
E5A	TAPBP
E5A	SFXN3
E5A	BDKRB2
E5A	SLC7A11
E5A	SLC22A18
E5A	PDGFRB
E5A	STOM
E5A	SLC35E1
E5A	ABCC1
E5A	BSCL2
E5A	PKD2
E5A	BAG2
E5A	HAX1
E5A	ATP5H
E5A	SURF4
E5A	CNP
E5A	S100A16
E5A	SSR4
E5A	DERL2
E5A	TECR
E5A	RAB32
E5A	TMEM259
E5A	TMEM33
E5A	SACM1L
E5A	TMEM43
E5A	TMEM159
E5A	RFTN1
E5A	CALR
E5A	TMEM87B
E5A	SLC3A2
E5A	BSG
E5A	EMD
E5A	TMX3
E5A	ATP2B4
E5A	USMG5
E5A	RNFT1
E5A	TMEM120A
E5A	AUP1
E5A	TAP2
E5A	RER1
E5A	RAB18
E5A	RTN4
E5A	S1PR3
E5A	SCFD1
E5A	PIGT
E5A	RP2
E5A	SLC25A12
E5A	ABLIM3
E5A	SLC44A2
E5A	TMED10
E5A	TRPA1
E5A	ATRN
E5A	ARL6IP5
E5A	CD44
E5A	TNPO1
E5A	SLC35F5
E5A	NAT14
E5A	SEC22B
E5A	IKBIP
E5A	TM9SF3
E5A	IFITM3
E5A	TMEM55A
E5A	UBQLN1
E5A	TAP1
E5A	PSMC4
E5A	AIFM1
E5A	CAV1
E5A	FADS2
E5A	MBOAT7
E5A	ABHD12
E5A	RETREG3
E5A	TRPV2
E5A	UBAC2
E5A	SEC61A1
E5A	LPCAT3
E5A	CLPTM1
E5A	SNX14
E5A	RPN2
E5A	UBIAD1
E5A	SLC4A2
E5A	GALNT5
E5A	MT-ATP8
E5A	LPGAT1
E5A	SLC7A5
E5A	NDUFB1
E5A	PLPP6
E5A	SLC5A3
E5A	B4GAT1
E5A	CTSB
E5A	PON2
E5A	TMCO3
E5A	SERINC1
E5A	S100A13
E5A	ATP5J
E5A	RDH11
E5A	PLD3
E5A	ATP5O
E5A	SAYSD1
E5A	FITM2
E5A	TMEM165
E5A	PGRMC1
E5A	SLC27A4
E5A	RNF5
E5A	SLC30A7
E5A	IMMT
E5A	ATP13A3
E5A	HSD17B12
E5A	RETREG2
E5A	RMDN3
E5A	OSTC
E5A	TM9SF2
E5A	CSPG4
E5A	SQOR
E5A	ERLIN1
E5A	GALNT2
E5A	NOTCH2
E5A	ERGIC1
E5A	SRPRB
E5A	SLC22A17
E5A	PDLIM7
E5A	ITM2C
E5A	RFT1
E5A	APOB
E5A	HACD3
E5A	CDS2
E5A	FAR1
E5A	WFS1
E5A	AFG3L2
E5A	MAVS
E5A	ERLIN2
E5A	MAIP1
E5A	GOLT1B
E5A	SLC35B2
E5A	ZFPL1
E5A	MPZL1
E5A	MT-ATP6
E5A	TMEM87A
E5A	ACSL3
E5A	TM9SF1
E5A	YIPF4
E5A	TRPM4
E5A	GPAT4
E5A	COPE
E5A	KDSR
E5A	PBXIP1
E5A	ITGB1
E5A	SSR3
E5A	SCAMP3
E5A	CHP1
E5A	EI24
E5A	ALG1
E5A	COX20
E5A	VKORC1L1
E5A	MARCKS
E5A	PIGO
E5A	SCD
E5A	UNC93B1
E5A	FKBP8
E5A	DIRC2
E5A	NDUFA4
E5A	ACSL4
E5A	FADS1
E5A	GPAA1
E5A	ABCC4
E5A	RPS27L
E5A	ENDOD1
E5A	SLC16A3
E5A	TMEM115
E5A	ICMT
E5A	CEPT1
E5A	PIGU
E5A	CLCC1
E5A	PRAF2
E5A	MTCH2
E5A	ABCB7
E5A	MRGPRF
E5A	GGT7
E5A	ATP9A
E5A	ASPH
E5A	SLC38A10
E5A	FZD6
E5A	RAB34
E5A	STT3B
E5A	SCAMP4
E5A	CDIPT
E5A	NCEH1
E5A	ARMCX3
E5A	ATAD3A
E5A	SPTLC2
E5A	SNX19
E5A	ATP2A2
E5A	PLXNB2
E5A	PHB2
E5A	MYOF
E5A	SPTLC1
E5A	TBL2
E5A	DNAJC13
E5A	PGRMC2
E5A	MT-CO2
E5A	PIEZO1
E5A	SEC63
E5A	GCN1
E5A	COMT
E5A	CERS2
E5A	TMEM245
E5A	ABCD1
E5A	DERL1
E5A	COPB1
E5A	PTK7
E5A	SPNS1
E5B	TRAM1
E5B	STIM1
E5B	TMEM259
E5B	SRRM2
E5B	GLRB
E5B	RPL13A
E5B	CHPF
E5B	NIPSNAP1
E5B	RPS27L
E5B	RFTN1
E5B	FKBP8
E5B	STT3A
E5B	SLC30A7
E5B	ECE1
E5B	SLC1A5
E5B	PLD3
E5B	CNTNAP1
E5B	LRRC8A
E5B	PTK7
E5B	SGCB
E5B	P4HB
E5B	RPL21
E5B	ADAM9
E5B	RPL3
E5B	CDKAL1
E5B	FNDC3B
E5B	TMEM55A
E5B	DNAJA3
E5B	ABCD1
E5B	ATP2A2
E5B	CPT1A
E5B	MMP14
E5B	EMD
E5B	BSCL2
E5B	ATP2B1
E5B	SLC27A3
E5B	PNPLA6
E5B	PDIA3
E5B	COPA
E5B	GPX8
E5B	ERLEC1
E5B	RHOT1
E5B	COPG1
E5B	PLPP6
E5B	FAF2
E5B	ABHD12
E5B	PKD2
E5B	CANX
E5B	WLS
E5B	PTTG1IP
E5B	MAP7D1
E5B	ACSL3
E5B	VAPA
E5B	GAS6
E5B	SCFD1
E5B	PSMC2
E5B	SGTA
E5B	RPS27
E5B	STT3B
E5B	SURF4
E5B	PSMD4
E5B	TFRC
E5B	ACBD3
E5B	TMPO
E5B	TIMM50
E5B	COPB2
E5B	CALR
E5B	SSR4
E5B	COPE
E5B	SGPL1
E5B	PSMC4
E5B	EDEM3
E5B	SCD
E5B	HSD17B12
E5B	PLOD1
E5B	KCT2
E5B	SPTLC2
E5B	SPTLC1
E5B	ITGB1
E5B	TM9SF1
E5B	PLXNB2
E5B	UBAC2
E5B	PGRMC2
E5B	TTC13
E5B	GLIPR1
E5B	NDUFA4
E5B	GDAP1
E5B	LAPTM4A
E5B	MAVS
E5B	ATP2C1
E5B	GRAMD2B
E5B	SLC7A5
E5B	SLC25A11
E5B	SEC11A
E5B	QSOX1
E5B	USMG5
E5B	STX4
E5B	TAP1
E5B	NOTCH2
E5B	SLIRP
E5B	SEC61B
E5B	ASPH
E5B	ERGIC1
E5B	PSMC1
E5B	PON2
E5B	ESYT2
E5B	CDIPT
E5B	NPLOC4
E5B	ATAD3A
E5B	RTN4
E5B	BAG2
E5B	FAR1
E5B	ADAM10
E5B	FTH1
E5B	PRAF2
E5B	PHB2
E5B	APOE
E5B	DDOST
E5B	SLC4A2
E5B	RPN2
E5B	MFGE8
E5B	FADS2
E5B	CLPTM1
E5B	GPD2
E5B	CDS2
E5B	IGF2R
E5B	MPZL1
E5B	CNP
E5B	ERLIN1
E5B	PDGFRB
E5B	SEC22B
E5B	MGST1
E5B	SLC25A12
E5B	EGFR
E5B	MT-CO2
E5B	DNAJA1
E5B	ABCC1
E5B	FZD6
E5B	GREM1
E5B	GPC1
E5B	ATP1A1
E5B	ICMT
E5B	ADCY6
E5B	STOM
E5B	RPL37A
E5B	HMOX2
E5B	AXL
E5B	LOX
E5B	MICAL2
E5B	PTPN1
E5B	UFD1
E5B	RAP1A
E5B	ENG
E5B	CAVIN3
E5B	CHRM2
E5B	JAK1
E5B	SLC3A2
E5B	SRPRA
E5B	ATP2B4
E5B	GJA1
E5B	CSPG4
E5B	IKBIP
E5B	RPS13
E5B	NCEH1
E5B	CAVIN1
E5B	SLC27A1
E5B	PGRMC1
E5B	HAX1
E5B	TMX3
E5B	MBOAT7
E5B	CHP1
E5B	SLC27A4
E5B	IMMT
E5B	LRP10
E5B	PREB
E5B	MEGF8
E5B	GALNT5
E5B	MTCH2
E5B	ABLIM3
E5B	SGCD
E5B	CLU
E5B	SLC2A1
E5B	SARAF
E5B	SPARC
E5B	SLC22A18
E5B	PBXIP1
E5B	CREB3L1
E5B	ZFPL1
E5B	ERLIN2
E5B	F2R
E5B	GRAMD1A
E5B	TMEM158
E5B	RMDN3
E5B	TM9SF3
E5B	SRPRB
E5B	CCPG1
E5B	ALG1
E5B	AMFR
E5B	TRHDE
E5B	PCDHGB5
E5B	PSMD1
E5B	SSR3
E5B	DNAJC16
E5B	WRNIP1
E5B	ESYT1
E5B	SQOR
E5B	RAB34
E5B	SNX14
E5B	AFG3L2
E5B	TBL2
E5B	CHCHD3
E5B	MXRA8
E5B	RDH14
E5B	TMEM30A
E5B	SLC38A10
E5B	RNF170
E5B	TMEM165
E5B	MYOF
E5B	GGT7
E5B	RAB18
E5B	DPP7
E5B	CDCP1
E5B	RETSAT
E5B	PHTF1
E5B	PCDH18
E5B	VKORC1
E5B	ATP13A1
E5B	LNP
E5B	ERBB2
E5B	TOR4A
E5B	SLC25A13
E5B	DNAJC11
E5B	SEC63
E5B	SLC25A22
E5B	PCYOX1
E5B	SACM1L
E5B	TRPV2
E5B	SFXN3
E5B	ITM2C
E5B	APMAP
E5B	ARMCX3
E5B	ABCB6
E5B	QPCTL
E5B	GLG1
E5B	TMEM109
E5B	TOR1AIP2
E5B	DNAJB14
E5B	TECR
E5B	SPNS1
E5B	SH3BP4
E5B	FAM8A1
E5B	RRBP1
E5B	OSTC
E5B	CD44
E5B	DNAJB9
E5B	SUN1
E5B	VKORC1L1
E5B	LRRC59
E5B	ABCA1
E5B	PDLIM7
E5B	PIEZO1
E5B	ERP44
E5B	ENDOD1
E5B	STAU1
E5B	RDH11
E5B	COMT
E5B	SELENOK
E6	NHERF1
E6	RPL4
E6	BAK1
E6	CLUH
E6	TP73
E6	TYK2
E6	SIK1
E6	SERPINB5
E6	MAP2K2
E6	SERTAD1
E6	LDHA
E6	SCAMP2
E6	HSPA5
E6	EP300
E6	KDM1A
E6	PCDH11X
E6	GEM
E6	APP
E6	9-Sep
E6	EIF5
E6	SNTB2
E6	PRKAA2
E6	DLG1
E6	TM4SF1
E6	RAB15
E6	MT-CO1
E6	SIPA1L2
E6	MT-CYB
E6	NAGK
E6	C3
E6	MT-ATP6
E6	PTPN3
E6	TMEM106C
E6	MESDC2
E6	MYOF
E6	LOX
E6	MT-CO3
E6	EML2
E6	MT-CO2
E6	MAP4
E6	TCHP
E6	RRBP1
E6	USO1
E6	PSMA5
E6	EFEMP2
E6	LAMTOR3
E6	SCNM1
E6	SRRM2
E6	IL18R1
E6	VPS29
E6	SMAD4
E6	TRAFD1
E6	LAMTOR5
E6	TSEN34
E6	TCIRG1
E6	IRF6
E6	FADD
E6	NDUFA2
E6	COPE
E6	IRF3
E6	NFX1
E6	CLIC1
E6	LRPPRC
E6	SYNGR2
E6	AGRN
E6	CEP70
E6	PUM2
E6	PI4KB
E6	PTGES
E6	SNRPA
E6	NCAPH
E6	ERP44
E6	CDC20
E6	PSMD14
E6	BCAT2
E6	TAX1BP3
E6	MGST3
E6	TNPO2
E6	ELF1
E6	SPINT1
E6	TPP1
E6	DNAJA1
E6	SFN
E6	OTX1
E6	RBCK1
E6	ICAM3
E6	PFN2
E6	SIPA1L1
E6	LAMA5
E6	PPIA
E6	BCL2L13
E6	LAD1
E6	YKT6
E6	TBC1D7
E6	GIPC1
E6	GOPC
E6	MCM5
E6	CNIH4
E6	ZNF581
E6	PPL
E6	CATSPER1
E6	TP53
E6	GPS2
E6	MED15
E6	ERGIC3
E6	HDGFL2
E6	CTTNBP2NL
E6	MRPS16
E6	UBR5
E6	CYLD
E6	WDR13
E6	CARD9
E6	QARS
E6	PSMC1
E6	PSMD11
E6	FAM216A
E6	EMC9
E6	HDAC7
E6	SMAD3
E6	RCN2
E6	STAG3L4
E6	RNH1
E6	CCDC110
E6	FAM96B
E6	PUM1
E6	RPS27L
E6	PARVG
E6	SLC45A3
E6	MAGI1
E6	ATP2A2
E6	NPM1
E6	GCN1
E6	PSMD1
E6	DOCK7
E6	ORC4
E6	CANT1
E6	ANXA2
E6	YBX1
E6	SQOR
E6	RSRC2
E6	APMAP
E6	MMP14
E6	SIRT6
E6	MMS19
E6	EIF3L
E6	PPP1R16B
E6	TRIM11
E6	ATP23
E6	DNAJC25
E6	FN1
E6	VPS11
E6	PSMC6
E6	PSMD12
E6	PSMC4
E6	PSMC2
E6	CCT6A
E6	MTCL1
E6	PSMC5
E6	TBP
E6	PSMD7
E6	PSMD3
E6	RNPEP
E6	PDLIM7
E6	CCHCR1
E6	ABCE1
E6	ZNF655
E6	RFC2
E6	PSMA6
E6	PSMD4
E6	MCFD2
E6	SHCBP1
E6	CCNY
E6	EEF1A1P5
E6	STARD13
E6	INIP
E6	PTGES3
E6	NFU1
E6	PSMB4
E6	EXOSC5
E6	MAML1
E6	PSMB1
E6	PSMB2
E6	ACTB
E6	RAP2C
E6	PSMB5
E6	PRTFDC1
E6	ZNF417
E6	MORC4
E6	UBE3A
E6	DUOX1
E6	NOXA1
E6	PCBP1
E6	SCO1
E6	COX4I1
E6	PLEKHA5
E6	BCAS2
E6	CREBBP
E6	MYC
E6	TNFRSF12A
E6	CKAP4
E6	NME6
E6	VPS26A
E6	HADHA
E6	MYCBP2
E6	COPS6
E6	MYOZ1
E6	ATP5L
E6	GADD45GIP1
E6	DMRT3
E6	PPP2R1A
E6	GNAI2
E6	SHC1
E6	GABARAP
E6	CD2BP2
E6	ZNF543
E6	PAPLN
E6	GLYCTK
E6	AES
E6	MPDU1
E6	SNX5
E6	SLPI
E6	ANXA1
E6	CDC42EP1
E6	TK1
E6	MYCN
E6	MT1F
E6	PPM1B
E6	SF3A3
E6	TERT
E6	TNPO1
E6	TFAP4
E6	SRPRB
E6	FTL
E6	MT-ND1
E6	MT-ND2
E6	MT-ND3
E6	MT-ND4
E6	EXOC8
E6	LGMN
E6	CEP57L1
E6	GALNT6
E6	CTSD
E6	CCDC124
E6	PHB2
E6	NDUFS8
E6	NDUFB10
E6	NDRG1
E6	PSMA4
E6	PSMF1
E6	PSMA1
E6	IWS1
E6	PPP2R2A
E6	PLOD2
E6	ANO8
E6	PPP1R18
E6	ZHX2
E6	SEC61A1
E6	S100A14
E6	WRNIP1
E6	NINJ1
E6	CCDC114
E6	TMEM87B
E6	VPS35
E6	P2RX5
E6	GFPT1
E6	SLC25A3
E6	MCM3
E6	CTSB
E6	SOGA1
E6	RUVBL2
E6	UBE2W
E6	XRCC1
E6	MCM7
E6	TSC22D3
E6	APH1A
E6	UBN1
E6	PDIA3
E6	POLE3
E6	HMGB1
E6	DMD
E6	ST6GALNAC6
E6	HMGA1
E6	LRRC59
E6	METTL17
E6	PFKP
E6	ITPKC
E6	NATD1
E6	PTPN6
E6	RUNX2
E6	HDAC4
E6	PTMA
E6	INTS10
E6	PSMD13
E6	YIPF3
E6	SURF4
E6	RTL8C
E6	KRT8
E6	UNC119B
E6	SIK3
E6	PRKAR1A
E6	WDYHV1
E6	VKORC1
E6	KRT18
E6	SFI1
E6	YDJC
E6	MRPS11
E6	RAB33B
E6	HNRNPR
E6	VPS26B
E6	BAG3
E6	RPLP0
E6	GSTK1
E6	SUPT4H1
E6	C1D
E6	CASK
E6	GM2A
E6	RPL23
E6	PRPF31
E6	DYNC1H1
E6	OXSM
E6	GALNT5
E6	CASP10
E6	RACK1
E6	COX7C
E6	CNP
E6	TUBA1C
E6	RPS6
E6	THRAP3
E6	SNX27
E6	FAM50B
E6	RASD1
E6	DLG4
E6	TSEN54
E6	HNRNPDL
E6	PKN1
E6	NACA
E6	CIZ1
E6	NDUFB11
E6	CCDC120
E6	RPSA
E6	DMAC2
E6	TNFRSF10A
E6	KPNA2
E6	ILVBL
E6	TMSB10
E6	GJA1
E6	C7orf50
E6	LCN2
E6	RTP5
E6	GAS6
E6	TPT1
E6	ELOC
E6	KRT13
E6	COG6
E6	YWHAB
E6	GYS1
E6	ANXA3
E6	GAPDH
E6	FBLN1
E6	KRT15
E6	KRT4
E6	MAN1B1
E6	EEF1B2
E6	THOC5
E6	MED1
E6	MKS1
E6	FARSA
E6	RPL39
E6	MRPS33
E6	ATF4
E6	VEGFB
E6	COL6A1
E6	JAK1
E6	TEAD4
E6	TEAD2
E6	PKM
E6	FGFBP1
E6	M6PR
E6	LGALS1
E6	FLNA
E6	SELENOW
E6	TBL1XR1
E6	PFKM
E6	PSMC3
E6	SRPK1
E6	TRAPPC6A
E6	ANKRD13A
E6	TSTA3
E6	CD63
E6	LAMB3
E6	MRPL53
E6	KRT7
E6	GEMIN7
E6	SLC3A2
E6	KLK5
E6	NT5E
E6	PSMD6
E6	DCTN1
E6	TNFRSF1A
E6	INF2
E6	ETF1
E6	CSPP1
E6	HSP90B1
E6	COL6A2
E6	EBP
E6	ADH5
E6	SNRPB
E6	KRT83
E6	RIPK1
E6	PTHLH
E6	HLA-C
E6	NUP153
E6	GPR87
E6	RAB33A
E6	TSC2
E6	FASN
E6	PXN
E6	CD97
E6	ENO1
E6	PSMD8
E6	DUS1L
E6	TMEM205
E6	RPL3
E6	CTSA
E6	RPS9
E6	RPL13A
E6	RPL10
E6	TXN
E6	BRCA1
E6	MTA2
E6	IFI27
E6	UTRN
E6	DLK2
E6	ALDH1A3
E6	TRAM1
E6	RPS16
E6	SCRIB
E6	PRIM2
E6	ZYX
E6	TNS3
E6	SLCO3A1
E6	TMEM214
E6	DAB2IP
E6	HNRNPA3
E6	SAT1
E6	RPL21
E6	LAMTOR1
E6	NT5DC1
E6	KANK2
E6	NLRC3
E6	STEAP3
E6	RPL6
E6	VIM
E6	TSTD2
E6	SPOUT1
E6	FKBP15
E6	COPG1
E6	RPS13
E6	YLPM1
E6	RPS11
E6	LPCAT2
E6	SLC4A5
E6	TLR7
E6	LAMA3
E6	EIF1
E6	HERC2
E6	HGS
E6	DCAF6
E6	TPRA1
E6	CMTM1
E6	FHL2
E6	PDZD11
E6	SLC44A2
E6	RPS27
E6	PROM2
E6	KPNB1
E6	LARP1B
E6	RFC5
E6	ZMIZ1
E6	USP2
E6	RPL7A
E6	RPL5
E6	TMEM109
E6	AP5S1
E6	RPS12
E6	MBOAT7
E6	PDZRN3
E6	RPS5
E6	TMEM79
E6	CHPF
E6	VRK2
E6	PLK2
E6	FLOT1
E6	MAP1S
E6	BCAP31
E6	TMEM17
E6	RIPOR1
E6	RPL24
E6	ATP6V1H
E6	CDR2L
E6	RXRB
E6	IDH3G
E6	CDKN1A
E6	PEF1
E6	RPS3
E6	BAIAP2
E6	DAG1
E6	SSBP
E6	P53
E6	NEUL4
E6	CWC15
E6	PSD11
E6	ECI2
E6	ECH1
E6	WRIP1
E6	CC85C
E6	PRS6A
E6	PSB7
E6	UBB
E6	LNX3
E6	LNX4
[truncated: 990 more rows]
