# Supplementary material for: A systems-based method to repurpose marketed therapeutics for antiviral use: a SARS-CoV-2 case study
Source: Life Sci Alliance. 2021 Feb 16;4(5):e202000904. doi: 10.26508/lsa.202000904 (PMC7893815; doi:10.26508/lsa.202000904)
Supplement: Supplementary file 4 [file LSA-2020-00904_TableS4.xlsx]

## Sheet: S4 COVID matched Drug-Virus
DrugBank ID	Name	SARS-CoV-2 protein	Network score	Network Mean score
DB00114	Pyridoxal phosphate	NSP15	0.0335578	0.0158362
DB00133	Serine	NSP15	0.0335578	0.00394717
DB00139	Succinic acid	NSP15	0.0208787	0.0239071
DB00172	Proline	NSP15	0.0208787	0.011442
DB00242	Cladribine	NSP15	0.0259938	0.00652745
DB00280	Disopyramide	NSP15	0.00907742	0.00235302
DB00342	Terfenadine	NSP15	0.00907742	0.00728589
DB00458	Imipramine	NSP15	0.0186172	0.0151125
DB00477	Chlorpromazine	NSP15	0.0186172	0.0120936
DB00489	Sotalol	NSP15	0.00580513	0.00668526
DB00572	Atropine	NSP15	0.00907742	0.00499541
DB00604	Cisapride	NSP15	0.00953983	0.00421946
DB00679	Thioridazine	NSP15	0.00953983	0.00316268
DB00718	Adefovir dipivoxil	NSP15	0.0158312	0.00501242
DB00747	Scopolamine	NSP15	0.00907742	0.00508086
DB00841	Dobutamine	NSP15	0.00580513	0.00873878
DB00867	Ritodrine	NSP15	0.00580513	0.00648875
DB00945	Acetylsalicylic acid	NSP15	0.00815193	0.0255096
DB01064	Isoprenaline	NSP15	0.00580513	0.0116785
DB01065	Melatonin	NSP15	0.0188473	0.0111762
DB01136	Carvedilol	NSP15	0.0117079	0.0210712
DB01142	Doxepin	NSP15	0.0186172	0.0133818
DB01149	Nefazodone	NSP15	0.00953983	0.00436015
DB01182	Propafenone	NSP15	0.00580513	0.00704712
DB01593	Zinc	NSP15	0.0243528	0.0792482
DB02709	Resveratrol	NSP15	0.0225721	0.0300974
DB03566	Spermidine	NSP15	0.00580513	0.00713782
DB04315	Guanosine-5'-Diphosphate	NSP15	0.039899	0.0434823
DB04530	S,S-(2-Hydroxyethyl)Thiocysteine	NSP15	0.0186663	0.00698988
DB06144	Sertindole	NSP15	0.00953983	0.00505588
DB06616	Bosutinib	NSP15	0.0149974	0.00972091
DB07348	Brefeldin A	NSP15	0.0186663	0.00160863
DB08699	1-tert-butyl-3-(3-methylbenzyl)-1H-pyrazolo[3,4-d]pyrimidin-4-amine	NSP15	0.0149974	0.000555458
DB09061	Cannabidiol	NSP15	0.00953983	0.0269881
DB09130	Copper	NSP15	0.019556	0.142178
DB11638	Artenimol	NSP15	0.00845577	0.0841845
DB12010	Fostamatinib	NSP15	0.0596193	0.199009
DB14009	Medical Cannabis	NSP15	0.00953983	0.0240839
DB14011	Nabiximols	NSP15	0.00953983	0.0240839
DB14487	Zinc acetate	NSP15	0.0243528	0.0792482
DB14533	Zinc chloride	NSP15	0.0243528	0.0792482
DB01593	Zinc	NSP9	0.131524	0.0792482
DB09130	Copper	NSP9	0.247839	0.142178
DB11638	Artenimol	NSP9	0.0699412	0.0841845
DB12010	Fostamatinib	NSP9	0.271342	0.199009
DB14487	Zinc acetate	NSP9	0.131524	0.0792482
DB14533	Zinc chloride	NSP9	0.131524	0.0792482
DB00898	Ethanol	S	0.00897773	0.0245974
