# Supplementary material for: A systems-based method to repurpose marketed therapeutics for antiviral use: a SARS-CoV-2 case study
Source: Life Sci Alliance. 2021 Feb 16;4(5):e202000904. doi: 10.26508/lsa.202000904 (PMC7893815; doi:10.26508/lsa.202000904)
Supplement: Supplementary file 5 [file LSA-2020-00904_TableS5.xlsx]

## Sheet: KEGG_results
	ID	Description	GeneRatio	BgRatio	pvalue	p.adjust	qvalue	geneID	Count
hsa05033	hsa05033	Nicotine addiction	17/179	40/8081	1.97211e-18	4.61473e-16	2.67791e-16	2554/2555/2556/2557/2558/2559/2560/2561/2562/2563/2564/2565/2566/2567/2568/55879/1141	17
hsa04360	hsa04360	Axon guidance	29/179	182/8081	2.2453e-17	2.627e-15	1.52444e-15	1808/815/818/1969/2043/2041/2042/2044/285220/2045/2046/106821730/5058/5062/5063/10298/57144/56924/5295/5296/8503/5781/998/5879/5880/5881/387/29984/27289	29
hsa04727	hsa04727	GABAergic synapse	18/179	89/8081	5.40497e-13	4.21587e-11	2.44646e-11	2554/2555/2556/2557/2558/2559/2560/2561/2562/2563/2564/2565/2566/2567/2568/55879/2752/27165	18
hsa04722	hsa04722	Neurotrophin signaling pathway	20/179	119/8081	1.02586e-12	6.00126e-11	3.48251e-11	7531/815/818/814/4215/5295/5296/8503/5781/8767/998/5879/387/5600/6300/5603/1432/6195/6196/6197	20
hsa04723	hsa04723	Retrograde endocannabinoid signaling	20/179	148/8081	6.53997e-11	3.06071e-09	1.77612e-09	2554/2555/2556/2557/2558/2559/2560/2561/2562/2563/2564/2565/2566/2567/2568/55879/5600/6300/5603/1432	20
hsa05032	hsa05032	Morphine addiction	16/179	91/8081	1.05159e-10	4.10122e-09	2.37992e-09	2554/2555/2556/2557/2558/2559/2560/2561/2562/2563/2564/2565/2566/2567/2568/55879	16
hsa04660	hsa04660	T cell receptor signaling pathway	16/179	104/8081	8.33994e-10	2.78792e-08	1.61782e-08	106821730/5058/5062/5063/10298/57144/56924/5295/5296/8503/998/387/5600/6300/5603/1432	16
hsa05211	hsa05211	Renal cell carcinoma	13/179	69/8081	2.61996e-09	6.70522e-08	3.89102e-08	106821730/5058/5062/5063/10298/57144/56924/5295/5296/8503/5781/998/5879	13
hsa04114	hsa04114	Oocyte meiosis	17/179	129/8081	2.84475e-09	6.70522e-08	3.89102e-08	7529/7531/7532/7533/10971/7534/815/818/9088/9748/5600/6300/5603/1432/6195/6196/6197	17
hsa00480	hsa00480	Glutathione metabolism	12/179	57/8081	2.86548e-09	6.70522e-08	3.89102e-08	5226/2876/2877/2878/2879/2880/257202/2882/493869/2953/50484/6241	12
hsa04012	hsa04012	ErbB signaling pathway	13/179	85/8081	3.67759e-08	7.82323e-07	4.5398e-07	27/815/818/106821730/5058/5062/5063/10298/57144/56924/5295/5296/8503	13
hsa05135	hsa05135	Yersinia infection	16/179	137/8081	4.9221e-08	9.26708e-07	5.37766e-07	5295/5296/8503/998/5879/5880/5881/387/391/5600/6300/5603/1432/6195/6196/6197	16
hsa04370	hsa04370	VEGF signaling pathway	11/179	59/8081	5.14838e-08	9.26708e-07	5.37766e-07	5295/5296/8503/998/5879/5880/5881/5600/6300/5603/1432	11
hsa04510	hsa04510	Focal adhesion	19/179	201/8081	8.36796e-08	1.39864e-06	8.11629e-07	4638/85366/91807/340156/106821730/5058/5062/5063/10298/57144/56924/5295/5296/8503/998/5879/5880/5881/387	19
hsa04010	hsa04010	MAPK signaling pathway	23/179	294/8081	1.1575e-07	1.8057e-06	1.04784e-06	1969/3303/3304/3305/3306/3310/3312/4215/5058/5062/5494/5495/998/5879/5880/5881/5600/6300/5603/1432/6195/6196/6197	23
hsa04810	hsa04810	Regulation of actin cytoskeleton	19/179	218/8081	3.02734e-07	4.42748e-06	2.56925e-06	4638/85366/91807/340156/106821730/5058/5062/5063/10298/57144/56924/5295/5296/8503/998/5879/5880/5881/387	19
hsa04670	hsa04670	Leukocyte transendothelial migration	13/179	114/8081	1.23269e-06	1.69676e-05	9.84627e-06	5295/5296/8503/5781/998/5879/5880/387/399/5600/6300/5603/1432	13
hsa04664	hsa04664	Fc epsilon RI signaling pathway	10/179	68/8081	2.11524e-06	2.74981e-05	1.59571e-05	5295/5296/8503/5879/5880/5881/5600/6300/5603/1432	10
hsa04014	hsa04014	Ras signaling pathway	18/179	232/8081	3.42202e-06	4.21449e-05	2.44566e-05	27/1969/106821730/5058/5062/5063/10298/57144/56924/5295/5296/8503/5781/998/5879/5880/5881/387	18
hsa05170	hsa05170	Human immunodeficiency virus 1 infection	17/179	212/8081	4.15854e-06	4.86549e-05	2.82343e-05	106821730/5058/5062/5063/10298/57144/56924/5295/5296/8503/5879/5880/5881/5600/6300/5603/1432	17
hsa04213	hsa04213	Longevity regulating pathway - multiple species	9/179	62/8081	7.75344e-06	8.63955e-05	5.0135e-05	3303/3304/3305/3306/3310/3312/5295/5296/8503	9
hsa05132	hsa05132	Salmonella infection	18/179	249/8081	9.22745e-06	9.81465e-05	5.69541e-05	375/5058/5063/5286/5287/5288/8767/998/5879/387/388/391/399/57381/5600/6300/5603/1432	18
hsa04914	hsa04914	Progesterone-mediated oocyte maturation	11/179	100/8081	1.18485e-05	0.000117189	6.80043e-05	9088/5295/5296/8503/5600/6300/5603/1432/6195/6196/6197	11
hsa04340	hsa04340	Hedgehog signaling pathway	8/179	50/8081	1.20194e-05	0.000117189	6.80043e-05	1452/122011/1453/1454/53944/1455/1456/102800317	8
hsa04611	hsa04611	Platelet activation	12/179	124/8081	1.77458e-05	0.000166101	9.63879e-05	4638/85366/91807/340156/5295/5296/8503/387/5600/6300/5603/1432	12
hsa04080	hsa04080	Neuroactive ligand-receptor interaction	21/179	341/8081	1.93113e-05	0.000173802	0.000100857	2554/2555/2556/2557/2558/2559/2560/2561/2562/2563/2564/2565/2566/2567/2568/55879/2908/1140/1141/1142/1143	21
hsa04917	hsa04917	Prolactin signaling pathway	9/179	70/8081	2.13464e-05	0.000185002	0.000107356	2099/2100/5295/5296/8503/5600/6300/5603/1432	9
hsa01230	hsa01230	Biosynthesis of amino acids	9/179	75/8081	3.74873e-05	0.000313287	0.000181799	875/102724560/1431/2752/84706/5831/29968/5832/26227	9
hsa05205	hsa05205	Proteoglycans in cancer	15/179	205/8081	4.61626e-05	0.000372484	0.000216152	815/818/2099/5058/5295/5296/8503/5781/998/5879/387/5600/6300/5603/1432	15
hsa05418	hsa05418	Fluid shear stress and atherosclerosis	12/179	139/8081	5.56435e-05	0.000434019	0.00025186	2953/5295/5296/8503/5879/5880/5881/387/5600/6300/5603/1432	12
hsa04071	hsa04071	Sphingolipid signaling pathway	11/179	119/8081	6.12596e-05	0.000462411	0.000268336	5295/5296/8503/5879/5880/5881/387/5600/6300/5603/1432	11
hsa04933	hsa04933	AGE-RAGE signaling pathway in diabetic complications	10/179	100/8081	6.82988e-05	0.000499435	0.000289821	5295/5296/8503/5292/998/5879/5600/6300/5603/1432	10
hsa04625	hsa04625	C-type lectin receptor signaling pathway	10/179	104/8081	9.54129e-05	0.000676564	0.000392608	5058/5295/5296/8503/5781/387/5600/6300/5603/1432	10
hsa05120	hsa05120	Epithelial cell signaling in Helicobacter pylori infection	8/179	70/8081	0.000144944	0.000972373	0.000564265	5058/5781/998/5879/5600/6300/5603/1432	8
hsa05235	hsa05235	PD-L1 expression and PD-1 checkpoint pathway in cancer	9/179	89/8081	0.00014544	0.000972373	0.000564265	4215/5295/5296/8503/5781/5600/6300/5603/1432	9
hsa05203	hsa05203	Viral carcinogenesis	14/179	204/8081	0.000165033	0.00107271	0.000622493	7529/7531/7532/7533/10971/7534/2648/8850/5295/5296/8503/998/5879/387	14
hsa05145	hsa05145	Toxoplasmosis	10/179	112/8081	0.000177602	0.00112321	0.000651797	3303/3304/3305/3306/3310/3312/5600/6300/5603/1432	10
hsa04915	hsa04915	Estrogen signaling pathway	11/179	138/8081	0.000232281	0.0014132	0.000820077	2099/2100/3303/3304/3305/3306/3310/3312/5295/5296/8503	11
hsa04918	hsa04918	Thyroid hormone synthesis	8/179	75/8081	0.000235776	0.0014132	0.000820077	2876/2877/2878/2880/257202/2882/493869/3309	8
hsa05134	hsa05134	Legionellosis	7/179	57/8081	0.000241573	0.0014132	0.000820077	375/3303/3304/3305/3306/3310/3312	7
hsa03320	hsa03320	PPAR signaling pathway	8/179	76/8081	0.000258606	0.00147595	0.000856487	30/2168/2169/2170/2167/2171/2173/4199	8
hsa01200	hsa01200	Carbon metabolism	10/179	118/8081	0.000272783	0.00151979	0.000881928	5226/1431/1892/84706/54363/4191/4199/5095/29968/26227	10
hsa01522	hsa01522	Endocrine resistance	9/179	98/8081	0.000303609	0.00161047	0.000934551	2099/2100/5295/5296/8503/5600/6300/5603/1432	9
hsa04750	hsa04750	Inflammatory mediator regulation of TRP channels	9/179	98/8081	0.000303609	0.00161047	0.000934551	815/818/5295/5296/8503/5600/6300/5603/1432	9
hsa04612	hsa04612	Antigen processing and presentation	8/179	78/8081	0.000309706	0.00161047	0.000934551	3309/3303/3304/3305/3306/3308/3310/3312	8
hsa05020	hsa05020	Prion disease	16/179	273/8081	0.000349258	0.00177666	0.00103099	3309/3303/3304/3305/3306/3310/3312/5295/5296/8503/5879/5880/5600/6300/5603/1432	16
hsa00590	hsa00590	Arachidonic acid metabolism	7/179	61/8081	0.000370048	0.00184237	0.00106912	2876/2877/2878/2880/257202/2882/493869	7
hsa00630	hsa00630	Glyoxylate and dicarboxylate metabolism	5/179	30/8081	0.000458317	0.00223429	0.00129655	1431/2752/54363/4191/5095	5
hsa04015	hsa04015	Rap1 signaling pathway	13/179	210/8081	0.000759959	0.00359682	0.00208722	1969/5295/5296/8503/998/5879/5880/5881/387/5600/6300/5603/1432	13
hsa00270	hsa00270	Cysteine and methionine metabolism	6/179	50/8081	0.000768551	0.00359682	0.00208722	875/102724560/4191/29968/26227/6898	6
hsa05162	hsa05162	Measles	10/179	139/8081	0.000999858	0.00456837	0.00265101	3303/3304/3305/3306/3310/3312/5295/5296/8503/10399	10
hsa04912	hsa04912	GnRH signaling pathway	8/179	93/8081	0.00101519	0.00456837	0.00265101	815/818/4215/998/5600/6300/5603/1432	8
hsa04960	hsa04960	Aldosterone-regulated sodium reabsorption	5/179	37/8081	0.0012369	0.00546102	0.00316901	2810/4306/5295/5296/8503	5
hsa05130	hsa05130	Pathogenic Escherichia coli infection	12/179	197/8081	0.00139036	0.00597301	0.00346612	375/5058/5062/5063/5781/998/5879/387/5600/6300/5603/1432	12
hsa05212	hsa05212	Pancreatic cancer	7/179	76/8081	0.00140391	0.00597301	0.00346612	5295/5296/8503/998/5879/5880/5881	7
hsa05100	hsa05100	Bacterial invasion of epithelial cells	7/179	77/8081	0.00151598	0.00633464	0.00367597	5295/5296/8503/998/5879/387/391	7
hsa04110	hsa04110	Cell cycle	9/179	124/8081	0.00167476	0.00687534	0.00398974	2810/7529/7531/7532/7533/10971/7534/9088/7272	9
hsa00260	hsa00260	Glycine, serine and threonine metabolism	5/179	40/8081	0.00176983	0.00714035	0.00414352	212/875/102724560/29968/26227	5
hsa04380	hsa04380	Osteoclast differentiation	9/179	128/8081	0.00208654	0.00815085	0.00472991	814/5295/5296/8503/5879/5600/6300/5603/1432	9
hsa04620	hsa04620	Toll-like receptor signaling pathway	8/179	104/8081	0.00208996	0.00815085	0.00472991	5295/5296/8503/5879/5600/6300/5603/1432	8
hsa04068	hsa04068	FoxO signaling pathway	9/179	131/8081	0.00244546	0.00938094	0.00544373	1454/102800317/5295/5296/8503/5600/6300/5603/1432	9
hsa04310	hsa04310	Wnt signaling pathway	10/179	160/8081	0.00286561	0.0106532	0.00618203	815/818/1452/122011/1454/102800317/5879/5880/5881/387	10
hsa05210	hsa05210	Colorectal cancer	7/179	86/8081	0.00286817	0.0106532	0.00618203	5295/5296/8503/5879/5880/5881/387	7
hsa05161	hsa05161	Hepatitis B	10/179	162/8081	0.00313534	0.0114636	0.00665229	7529/10971/7534/5295/5296/8503/5600/6300/5603/1432	10
hsa04725	hsa04725	Cholinergic synapse	8/179	113/8081	0.00350992	0.0125546	0.0072854	815/818/814/5295/5296/8503/1141/1143	8
hsa04720	hsa04720	Long-term potentiation	6/179	67/8081	0.00354104	0.0125546	0.0072854	815/818/814/6195/6196/6197	6
hsa00280	hsa00280	Valine, leucine and isoleucine degradation	5/179	48/8081	0.00399445	0.0139508	0.00809559	11112/30/36/1892/5095	5
hsa05022	hsa05022	Pathways of neurodegeneration - multiple diseases	20/179	475/8081	0.00410623	0.0141302	0.00819974	815/818/1452/122011/1454/102800317/2876/2877/2878/2880/257202/2882/493869/3309/4294/5879/5600/6300/5603/1432	20
hsa04666	hsa04666	Fc gamma R-mediated phagocytosis	7/179	97/8081	0.00559914	0.0189884	0.0110189	5058/5295/5296/8503/998/5879/5880	7
hsa05214	hsa05214	Glioma	6/179	75/8081	0.00618018	0.0206595	0.0119886	815/818/814/5295/5296/8503	6
hsa04971	hsa04971	Gastric acid secretion	6/179	76/8081	0.00658957	0.0217178	0.0126027	815/818/4638/85366/91807/340156	6
hsa05142	hsa05142	Chagas disease	7/179	102/8081	0.00734227	0.0238624	0.0138473	5295/5296/8503/5600/6300/5603/1432	7
hsa04390	hsa04390	Hippo signaling pathway	9/179	157/8081	0.00802571	0.0251423	0.01459	7529/7531/7532/7533/10971/7534/1453/1454/102800317	9
hsa05160	hsa05160	Hepatitis C	9/179	157/8081	0.00802571	0.0251423	0.01459	7529/7531/7532/7533/10971/7534/5295/5296/8503	9
hsa00230	hsa00230	Purine metabolism	8/179	130/8081	0.00811919	0.0251423	0.01459	159/205/2618/8833/2766/5236/50484/6241	8
hsa01212	hsa01212	Fatty acid metabolism	5/179	57/8081	0.00832821	0.0251423	0.01459	30/36/1892/27349/2194	5
hsa05131	hsa05131	Shigellosis	12/179	246/8081	0.0083995	0.0251423	0.01459	375/5295/5296/8503/8767/998/5879/387/5600/6300/5603/1432	12
hsa04024	hsa04024	cAMP signaling pathway	11/179	216/8081	0.00843109	0.0251423	0.01459	815/818/814/5058/5295/5296/8503/5879/5880/5881/387	11
hsa04650	hsa04650	Natural killer cell mediated cytotoxicity	8/179	131/8081	0.00848821	0.0251423	0.01459	5058/5295/5296/8503/5781/5879/5880/5881	8
hsa00250	hsa00250	Alanine, aspartate and glutamate metabolism	4/179	37/8081	0.00869279	0.0254264	0.0147549	159/2752/27165/84706	4
hsa04662	hsa04662	B cell receptor signaling pathway	6/179	82/8081	0.00947004	0.0273579	0.0158757	5295/5296/8503/5879/5880/5881	6
hsa04931	hsa04931	Insulin resistance	7/179	108/8081	0.00993053	0.0283383	0.0164447	5295/5296/8503/5781/6195/6196/6197	7
hsa05163	hsa05163	Human cytomegalovirus infection	11/179	225/8081	0.011256	0.0317339	0.0184151	5295/5296/8503/5879/5880/5881/387/5600/6300/5603/1432	11
hsa04742	hsa04742	Taste transduction	6/179	86/8081	0.0118304	0.0328531	0.0190646	2554/2555/2556/2557/2558/2559	6
hsa04668	hsa04668	TNF signaling pathway	7/179	112/8081	0.011991	0.0328531	0.0190646	5295/5296/8503/5600/6300/5603/1432	7
hsa00220	hsa00220	Arginine biosynthesis	3/179	22/8081	0.0120742	0.0328531	0.0190646	2752/27165/84706	3
hsa00071	hsa00071	Fatty acid degradation	4/179	43/8081	0.0146632	0.039439	0.0228864	30/36/1892/10455	4
hsa04935	hsa04935	Growth hormone synthesis, secretion and action	7/179	119/8081	0.0163142	0.0433809	0.0251738	5295/5296/8503/5600/6300/5603/1432	7
hsa05152	hsa05152	Tuberculosis	9/179	180/8081	0.0184231	0.0484382	0.0281085	815/818/3313/8767/387/5600/6300/5603/1432	9
hsa04520	hsa04520	Adherens junction	5/179	71/8081	0.020241	0.0524701	0.0304483	998/5879/5880/5881/387	5
hsa04070	hsa04070	Phosphatidylinositol signaling system	6/179	97/8081	0.0204051	0.0524701	0.0304483	5286/5287/5288/5295/5296/8503	6
hsa04921	hsa04921	Oxytocin signaling pathway	8/179	154/8081	0.0209107	0.0531858	0.0308636	815/818/814/4638/85366/91807/340156/387	8
hsa05231	hsa05231	Choline metabolism in cancer	6/179	98/8081	0.0213497	0.0537187	0.0311728	5295/5296/8503/5879/5880/5881	6
hsa04926	hsa04926	Relaxin signaling pathway	7/179	129/8081	0.0242594	0.0603904	0.0350444	5295/5296/8503/5600/6300/5603/1432	7
hsa04392	hsa04392	Hippo signaling pathway - multiple species	3/179	29/8081	0.0255973	0.0630503	0.0365879	1454/102800317/5058	3
hsa05133	hsa05133	Pertussis	5/179	76/8081	0.0263147	0.0641422	0.0372215	387/5600/6300/5603/1432	5
hsa04062	hsa04062	Chemokine signaling pathway	9/179	192/8081	0.026684	0.0643717	0.0373547	5058/5295/5296/8503/998/5879/5880/5881/387	9
hsa04710	hsa04710	Circadian rhythm	3/179	31/8081	0.0304968	0.0728188	0.0422565	1453/1454/102800317	3
hsa00983	hsa00983	Drug metabolism - other enzymes	5/179	80/8081	0.0319324	0.0754767	0.0437989	8833/2953/7372/50484/6241	5
hsa04141	hsa04141	Protein processing in endoplasmic reticulum	8/179	171/8081	0.0360155	0.0842762	0.0489052	3309/3303/3304/3305/3306/3310/3312/5034	8
hsa00240	hsa00240	Pyrimidine metabolism	4/179	57/8081	0.0370353	0.0849633	0.0493039	1503/7372/50484/6241	4
hsa04923	hsa04923	Regulation of lipolysis in adipocytes	4/179	57/8081	0.0370353	0.0849633	0.0493039	2167/5295/5296/8503	4
hsa04550	hsa04550	Signaling pathways regulating pluripotency of stem cells	7/179	143/8081	0.0393517	0.089401	0.0518791	5295/5296/8503/5600/6300/5603/1432	7
hsa05416	hsa05416	Viral myocarditis	4/179	60/8081	0.0434724	0.0978128	0.0567605	27/5879/5880/5881	4
hsa05224	hsa05224	Breast cancer	7/179	147/8081	0.0445886	0.0993689	0.0576635	1452/122011/2099/2100/5295/5296/8503	7

## Sheet: GO_results
	ID	Description	GeneRatio	BgRatio	pvalue	p.adjust	qvalue	geneID	Count
GO:0007214	GO:0007214	gamma-aminobutyric acid signaling pathway	13/222	25/18670	3.05862e-19	5.52692e-16	4.501e-16	GABRA1/GABRA2/GABRA3/GABRA4/GABRA5/GABRA6/GABRB1/GABRB2/GABRB3/GABRE/GABRG1/GABRG2/GABRG3	13
GO:0051932	GO:0051932	synaptic transmission, GABAergic	14/222	45/18670	9.01239e-17	8.1427e-14	6.63122e-14	CA7/GABRA1/GABRA2/GABRA3/GABRA4/GABRA5/GABRA6/GABRB2/GABRE/GABRG1/GABRG2/GABRG3/NISCH/RAC3	14
GO:0030950	GO:0030950	establishment or maintenance of actin cytoskeleton polarity	9/222	12/18670	8.61674e-16	5.19015e-13	4.22674e-13	AQP1/RHOA/RHOB/RHOC/RHOD/RHOF/RND1/RND2/RND3	9
GO:1902476	GO:1902476	chloride transmembrane transport	16/222	88/18670	6.30303e-15	2.84739e-12	2.31885e-12	GABRA1/GABRA2/GABRA3/GABRA4/GABRA5/GABRA6/GABRB1/GABRB2/GABRB3/GABRD/GABRE/GABRG1/GABRG2/GABRG3/GABRP/GABRQ	16
GO:0030952	GO:0030952	establishment or maintenance of cytoskeleton polarity	9/222	16/18670	4.29945e-14	1.55382e-11	1.2654e-11	AQP1/RHOA/RHOB/RHOC/RHOD/RHOF/RND1/RND2/RND3	9
GO:0048013	GO:0048013	ephrin receptor signaling pathway	14/222	86/18670	1.59618e-12	4.80715e-10	3.91483e-10	EPHA2/EPHA4/EPHA1/EPHA3/EPHA5/EPHA6/EPHA7/EPHA8/PAK1/PAK3/PTPN11/CDC42/RAC1/RHOA	14
GO:0051085	GO:0051085	chaperone cofactor-dependent protein refolding	10/222	32/18670	2.36758e-12	6.11175e-10	4.97726e-10	HSPA5/HSPA14/HSPA1A/HSPA1B/HSPA1L/HSPA2/HSPA6/HSPA7/HSPA8/HSPA9	10
GO:0051084	GO:0051084	'de novo' posttranslational protein folding	10/222	37/18670	1.21376e-11	2.74157e-09	2.23267e-09	HSPA5/HSPA14/HSPA1A/HSPA1B/HSPA1L/HSPA2/HSPA6/HSPA7/HSPA8/HSPA9	10
GO:0042026	GO:0042026	protein refolding	10/222	40/18670	2.86319e-11	5.74866e-09	4.68157e-09	HSPA5/HSPA14/HSPA1A/HSPA1B/HSPA1L/HSPA2/HSPA6/HSPA7/HSPA8/HSPA9	10
GO:0006458	GO:0006458	'de novo' protein folding	10/222	41/18670	3.74774e-11	6.77217e-09	5.51509e-09	HSPA5/HSPA14/HSPA1A/HSPA1B/HSPA1L/HSPA2/HSPA6/HSPA7/HSPA8/HSPA9	10
GO:1903749	GO:1903749	positive regulation of establishment of protein localization to mitochondrion	10/222	58/18670	1.4625e-09	2.40249e-07	1.95653e-07	SFN/YWHAB/YWHAE/YWHAG/YWHAH/YWHAQ/YWHAZ/HSPA1L/RAC2/RHOU	10
GO:0061077	GO:0061077	chaperone-mediated protein folding	10/222	59/18670	1.74282e-09	2.6244e-07	2.13725e-07	HSPA5/HSPA14/HSPA1A/HSPA1B/HSPA1L/HSPA2/HSPA6/HSPA7/HSPA8/HSPA9	10
GO:1903747	GO:1903747	regulation of establishment of protein localization to mitochondrion	10/222	72/18670	1.30003e-08	1.80704e-06	1.47162e-06	SFN/YWHAB/YWHAE/YWHAG/YWHAH/YWHAQ/YWHAZ/HSPA1L/RAC2/RHOU	10
GO:1900739	GO:1900739	regulation of protein insertion into mitochondrial membrane involved in apoptotic signaling pathway	7/222	26/18670	1.65975e-08	1.99945e-06	1.6283e-06	SFN/YWHAB/YWHAE/YWHAG/YWHAH/YWHAQ/YWHAZ	7
GO:1900740	GO:1900740	positive regulation of protein insertion into mitochondrial membrane involved in apoptotic signaling pathway	7/222	26/18670	1.65975e-08	1.99945e-06	1.6283e-06	SFN/YWHAB/YWHAE/YWHAG/YWHAH/YWHAQ/YWHAZ	7
GO:0035970	GO:0035970	peptidyl-threonine dephosphorylation	6/222	16/18670	1.91545e-08	2.16326e-06	1.76171e-06	PDP1/PPM1A/PPM1B/PPM1D/PPM1F/PPM1G	6
GO:0015949	GO:0015949	nucleobase-containing small molecule interconversion	7/222	29/18670	3.82052e-08	4.06098e-06	3.30717e-06	AK4/CTPS1/GMPR/GLRX/RRM2B/RRM2/TXNRD1	7
GO:0008652	GO:0008652	cellular amino acid biosynthetic process	10/222	81/18670	4.14896e-08	4.10884e-06	3.34614e-06	AASS/CBS/CBSL/GLUL/GLS2/GPT2/PYCR1/PSAT1/ALDH18A1/PHGDH	10
GO:1901028	GO:1901028	regulation of mitochondrial outer membrane permeabilization involved in apoptotic signaling pathway	8/222	44/18670	4.3203e-08	4.10884e-06	3.34614e-06	SFN/YWHAB/YWHAE/YWHAG/YWHAH/YWHAQ/YWHAZ/HSPA1A	8
GO:0001844	GO:0001844	protein insertion into mitochondrial membrane involved in apoptotic signaling pathway	7/222	30/18670	4.93318e-08	4.45713e-06	3.62978e-06	SFN/YWHAB/YWHAE/YWHAG/YWHAH/YWHAQ/YWHAZ	7
GO:0051204	GO:0051204	protein insertion into mitochondrial membrane	8/222	45/18670	5.20103e-08	4.47536e-06	3.64463e-06	SFN/YWHAB/YWHAE/YWHAG/YWHAH/YWHAQ/YWHAZ/HSPA4	8
GO:1901607	GO:1901607	alpha-amino acid biosynthetic process	9/222	64/18670	6.311e-08	5.18363e-06	4.22143e-06	AASS/CBS/CBSL/GLUL/GLS2/PYCR1/PSAT1/ALDH18A1/PHGDH	9
GO:0090151	GO:0090151	establishment of protein localization to mitochondrial membrane	8/222	47/18670	7.43406e-08	5.84059e-06	4.75644e-06	SFN/YWHAB/YWHAE/YWHAG/YWHAH/YWHAQ/YWHAZ/HSPA4	8
GO:1902108	GO:1902108	regulation of mitochondrial membrane permeability involved in apoptotic process	9/222	66/18670	8.30911e-08	6.25607e-06	5.0948e-06	SFN/YWHAB/YWHAE/YWHAG/YWHAH/YWHAQ/YWHAZ/CAMK2A/HSPA1A	9
GO:0034776	GO:0034776	response to histamine	5/222	11/18670	9.9053e-08	7.15955e-06	5.83057e-06	GABRA1/GABRB1/GABRB2/GABRB3/GABRG2	5
GO:1901030	GO:1901030	positive regulation of mitochondrial outer membrane permeabilization involved in apoptotic signaling pathway	7/222	35/18670	1.54924e-07	1.07672e-05	8.76857e-06	SFN/YWHAB/YWHAE/YWHAG/YWHAH/YWHAQ/YWHAZ	7
GO:1904862	GO:1904862	inhibitory synapse assembly	5/222	12/18670	1.68162e-07	1.12544e-05	9.16534e-06	GABRA1/GABRA2/GABRB2/GABRB3/GABRG2	5
GO:0097345	GO:0097345	mitochondrial outer membrane permeabilization	8/222	54/18670	2.29012e-07	1.47795e-05	1.2036e-05	SFN/YWHAB/YWHAE/YWHAG/YWHAH/YWHAQ/YWHAZ/HSPA1A	8
GO:0046902	GO:0046902	regulation of mitochondrial membrane permeability	9/222	76/18670	2.88554e-07	1.79799e-05	1.46424e-05	SFN/YWHAB/YWHAE/YWHAG/YWHAH/YWHAQ/YWHAZ/CAMK2A/HSPA1A	9
GO:1902110	GO:1902110	positive regulation of mitochondrial membrane permeability involved in apoptotic process	8/222	60/18670	5.29727e-07	3.19072e-05	2.59845e-05	SFN/YWHAB/YWHAE/YWHAG/YWHAH/YWHAQ/YWHAZ/HSPA1A	8
GO:0051205	GO:0051205	protein insertion into membrane	8/222	62/18670	6.85876e-07	3.76055e-05	3.06251e-05	SFN/YWHAB/YWHAE/YWHAG/YWHAH/YWHAQ/YWHAZ/HSPA4	8
GO:1902686	GO:1902686	mitochondrial outer membrane permeabilization involved in programmed cell death	8/222	62/18670	6.85876e-07	3.76055e-05	3.06251e-05	SFN/YWHAB/YWHAE/YWHAG/YWHAH/YWHAQ/YWHAZ/HSPA1A	8
GO:0006910	GO:0006910	phagocytosis, recognition	9/222	84/18670	6.86764e-07	3.76055e-05	3.06251e-05	IGHA1/IGHG1/IGHG2/IGHG4/IGHM/IGHV1OR15-1/IGHV3-23/IGKC/IGLC1	9
GO:0090559	GO:0090559	regulation of membrane permeability	9/222	86/18670	8.40417e-07	4.46657e-05	3.63747e-05	SFN/YWHAB/YWHAE/YWHAG/YWHAH/YWHAQ/YWHAZ/CAMK2A/HSPA1A	9
GO:0035794	GO:0035794	positive regulation of mitochondrial membrane permeability	8/222	64/18670	8.79749e-07	4.54202e-05	3.69892e-05	SFN/YWHAB/YWHAE/YWHAG/YWHAH/YWHAQ/YWHAZ/HSPA1A	8
GO:1905710	GO:1905710	positive regulation of membrane permeability	8/222	66/18670	1.11856e-06	5.61454e-05	4.57235e-05	SFN/YWHAB/YWHAE/YWHAG/YWHAH/YWHAQ/YWHAZ/HSPA1A	8
GO:0030901	GO:0030901	midbrain development	9/222	90/18670	1.23875e-06	6.0498e-05	4.92682e-05	YWHAE/YWHAH/YWHAQ/CSNK1D/CSNK1E/KAT2A/HSPA5/CDC42/RHOA	9
GO:0110020	GO:0110020	regulation of actomyosin structure organization	9/222	95/18670	1.95775e-06	9.30962e-05	7.58154e-05	EPHA1/MYLK3/PAK1/PIK3R1/PPM1F/CDC42/RAC1/RHOA/RHOC	9
GO:0051496	GO:0051496	positive regulation of stress fiber assembly	7/222	51/18670	2.26973e-06	0.000105164	8.56432e-05	EPHA1/PAK1/PPM1F/CDC42/RAC1/RHOA/RHOC	7
GO:0009064	GO:0009064	glutamine family amino acid metabolic process	8/222	74/18670	2.70539e-06	0.000122002	9.93553e-05	CTPS1/GLUL/GLS2/GMPS/PYCR1/ALDH18A1/PHGDH/TAT	8
GO:0043648	GO:0043648	dicarboxylic acid metabolic process	9/222	99/18670	2.76816e-06	0.000122002	9.93553e-05	ADSS2/ALDH1L1/GLUL/GLS2/GPT2/MDH2/ME1/ALDH18A1/TAT	9
GO:0019433	GO:0019433	triglyceride catabolic process	6/222	35/18670	3.21445e-06	0.000138298	0.000112627	FABP1/FABP2/FABP3/FABP4/FABP5/FABP7	6
GO:0031295	GO:0031295	T cell costimulation	7/222	56/18670	4.32331e-06	0.000181679	0.000147956	PAK1/PAK2/PAK3/PIK3R1/PTPN11/CDC42/RAC1	7
GO:0031294	GO:0031294	lymphocyte costimulation	7/222	57/18670	4.87919e-06	0.000200379	0.000163184	PAK1/PAK2/PAK3/PIK3R1/PTPN11/CDC42/RAC1	7
GO:0006541	GO:0006541	glutamine metabolic process	5/222	23/18670	6.42096e-06	0.000255439	0.000208024	CTPS1/GLUL/GLS2/GMPS/PHGDH	5
GO:0051893	GO:0051893	regulation of focal adhesion assembly	7/222	60/18670	6.91532e-06	0.000255439	0.000208024	EPHA3/PPM1F/RAC1/RHOA/RHOD/SLK/DAPK3	7
GO:0090109	GO:0090109	regulation of cell-substrate junction assembly	7/222	60/18670	6.91532e-06	0.000255439	0.000208024	EPHA3/PPM1F/RAC1/RHOA/RHOD/SLK/DAPK3	7
GO:0150116	GO:0150116	regulation of cell-substrate junction organization	7/222	60/18670	6.91532e-06	0.000255439	0.000208024	EPHA3/PPM1F/RAC1/RHOA/RHOD/SLK/DAPK3	7
GO:0043154	GO:0043154	negative regulation of cysteine-type endopeptidase activity involved in apoptotic process	8/222	84/18670	7.06805e-06	0.000255439	0.000208024	SFN/YWHAE/AQP1/FABP1/GPX1/PAK2/RPS6KA1/RPS6KA3	8
GO:0051492	GO:0051492	regulation of stress fiber assembly	8/222	84/18670	7.06805e-06	0.000255439	0.000208024	EPHA1/PAK1/PIK3R1/PPM1F/CDC42/RAC1/RHOA/RHOC	8
GO:0032233	GO:0032233	positive regulation of actin filament bundle assembly	7/222	61/18670	7.73352e-06	0.000274009	0.000223147	EPHA1/PAK1/PPM1F/CDC42/RAC1/RHOA/RHOC	7
GO:0009069	GO:0009069	serine family amino acid metabolic process	6/222	41/18670	8.39016e-06	0.000291558	0.000237438	CBS/CBSL/CSAD/GART/PSAT1/PHGDH	6
GO:0048857	GO:0048857	neural nucleus development	7/222	62/18670	8.63049e-06	0.000294251	0.000239631	YWHAE/YWHAH/YWHAQ/HSPA5/CDC42/RHOA/CHRNB2	7
GO:0006563	GO:0006563	L-serine metabolic process	4/222	12/18670	8.93728e-06	0.000299068	0.000243554	CBS/CBSL/PSAT1/PHGDH	4
GO:0021762	GO:0021762	substantia nigra development	6/222	43/18670	1.11526e-05	0.000353558	0.000287929	YWHAE/YWHAH/YWHAQ/HSPA5/CDC42/RHOA	6
GO:0046461	GO:0046461	neutral lipid catabolic process	6/222	43/18670	1.11526e-05	0.000353558	0.000287929	FABP1/FABP2/FABP3/FABP4/FABP5/FABP7	6
GO:0046464	GO:0046464	acylglycerol catabolic process	6/222	43/18670	1.11526e-05	0.000353558	0.000287929	FABP1/FABP2/FABP3/FABP4/FABP5/FABP7	6
GO:2000117	GO:2000117	negative regulation of cysteine-type endopeptidase activity	8/222	92/18670	1.39118e-05	0.000433424	0.000352971	SFN/YWHAE/AQP1/FABP1/GPX1/PAK2/RPS6KA1/RPS6KA3	8
GO:0036092	GO:0036092	phosphatidylinositol-3-phosphate biosynthetic process	4/222	14/18670	1.7738e-05	0.000543265	0.000442422	PIK3C2A/PIK3C2B/PIK3C2G/PIK3R3	4
GO:0048010	GO:0048010	vascular endothelial growth factor receptor signaling pathway	8/222	96/18670	1.90288e-05	0.000573084	0.000466706	PAK2/PIK3R1/PIK3R2/CDC42/RAC1/RHOA/MAPK11/MAPK14	8
GO:0032231	GO:0032231	regulation of actin filament bundle assembly	8/222	97/18670	2.05296e-05	0.000608146	0.00049526	EPHA1/PAK1/PIK3R1/PPM1F/CDC42/RAC1/RHOA/RHOC	8
GO:0030038	GO:0030038	contractile actin filament bundle assembly	8/222	98/18670	2.21284e-05	0.000634699	0.000516884	EPHA1/PAK1/PIK3R1/PPM1F/CDC42/RAC1/RHOA/RHOC	8
GO:0043149	GO:0043149	stress fiber assembly	8/222	98/18670	2.21284e-05	0.000634699	0.000516884	EPHA1/PAK1/PIK3R1/PPM1F/CDC42/RAC1/RHOA/RHOC	8
GO:0019395	GO:0019395	fatty acid oxidation	8/222	99/18670	2.38304e-05	0.000672837	0.000547943	ACAA1/ECHS1/MCAT/FABP1/FABP3/HAO1/ECI2/MAPK14	8
GO:0007274	GO:0007274	neuromuscular synaptic transmission	5/222	30/18670	2.54105e-05	0.000706413	0.000575286	MYLK2/CHRNB1/CHRNB2/CHRNB3/CHRNB4	5
GO:0046854	GO:0046854	phosphatidylinositol phosphorylation	6/222	50/18670	2.71233e-05	0.000731521	0.000595733	PIK3C2A/PIK3C2B/PIK3C2G/PIK3R1/PIK3R2/PIK3R3	6
GO:0070671	GO:0070671	response to interleukin-12	6/222	50/18670	2.71233e-05	0.000731521	0.000595733	ARF1/HSPA9/P4HB/PAK2/RIPK2/CDC42	6
GO:0009070	GO:0009070	serine family amino acid biosynthetic process	4/222	17/18670	4.10077e-05	0.00108972	0.000887443	CBS/CBSL/PSAT1/PHGDH	4
GO:1900034	GO:1900034	regulation of cellular response to heat	7/222	79/18670	4.28797e-05	0.00112295	0.000914506	YWHAE/CAMK2A/CAMK2G/HSPA1A/HSPA1B/HSPA1L/HSPA8	7
GO:0016601	GO:0016601	Rac protein signal transduction	5/222	34/18670	4.77333e-05	0.0012322	0.00100348	NISCH/RAC1/RAC2/RHOG/RHOU	5
GO:0032436	GO:0032436	positive regulation of proteasomal ubiquitin-dependent protein catabolic process	7/222	81/18670	5.04142e-05	0.00126526	0.0010304	CSNK1A1/CSNK1A1L/CSNK1D/CSNK1E/HSPA1A/HSPA1B/RACK1	7
GO:0048041	GO:0048041	focal adhesion assembly	7/222	81/18670	5.04142e-05	0.00126526	0.0010304	EPHA3/PPM1F/RAC1/RHOA/RHOD/SLK/DAPK3	7
GO:0009084	GO:0009084	glutamine family amino acid biosynthetic process	4/222	18/18670	5.22339e-05	0.00129297	0.00105296	GLUL/GLS2/PYCR1/ALDH18A1	4
GO:0009112	GO:0009112	nucleobase metabolic process	5/222	36/18670	6.34327e-05	0.00154896	0.00126144	CTPS1/GART/GMPS/GMPR/UMPS	5
GO:0046112	GO:0046112	nucleobase biosynthetic process	4/222	19/18670	6.55478e-05	0.00157926	0.00128612	CTPS1/GART/GMPS/UMPS	4
GO:0046824	GO:0046824	positive regulation of nucleocytoplasmic transport	6/222	62/18670	9.31937e-05	0.0022158	0.0018045	SFN/YWHAE/PIK3R1/PIK3R2/PPM1A/MAPK14	6
GO:0046503	GO:0046503	glycerolipid catabolic process	6/222	64/18670	0.000111437	0.00258163	0.00210242	FABP1/FABP2/FABP3/FABP4/FABP5/FABP7	6
GO:0046834	GO:0046834	lipid phosphorylation	6/222	64/18670	0.000111437	0.00258163	0.00210242	PIK3C2A/PIK3C2B/PIK3C2G/PIK3R1/PIK3R2/PIK3R3	6
GO:2000060	GO:2000060	positive regulation of ubiquitin-dependent protein catabolic process	7/222	95/18670	0.000139227	0.0031846	0.00259346	CSNK1A1/CSNK1A1L/CSNK1D/CSNK1E/HSPA1A/HSPA1B/RACK1	7
GO:0007044	GO:0007044	cell-substrate junction assembly	7/222	97/18670	0.000158648	0.00349606	0.00284711	EPHA3/PPM1F/RAC1/RHOA/RHOD/SLK/DAPK3	7
GO:0060996	GO:0060996	dendritic spine development	7/222	97/18670	0.000158648	0.00349606	0.00284711	ARF1/CAMK2A/EPHA4/PAK2/PAK3/PAK4/CDC42	7
GO:0150115	GO:0150115	cell-substrate junction organization	7/222	97/18670	0.000158648	0.00349606	0.00284711	EPHA3/PPM1F/RAC1/RHOA/RHOD/SLK/DAPK3	7
GO:0035722	GO:0035722	interleukin-12-mediated signaling pathway	5/222	47/18670	0.000232109	0.00505326	0.00411526	ARF1/HSPA9/P4HB/PAK2/CDC42	5
GO:0090084	GO:0090084	negative regulation of inclusion body assembly	3/222	11/18670	0.00025506	0.00548683	0.00446834	HSPA1A/HSPA1B/HSPA2	3
GO:0043124	GO:0043124	negative regulation of I-kappaB kinase/NF-kappaB signaling	5/222	49/18670	0.000283035	0.00592802	0.00482764	ESR1/PPM1A/PPM1B/RHOA/RHOH	5
GO:0071349	GO:0071349	cellular response to interleukin-12	5/222	49/18670	0.000283035	0.00592802	0.00482764	ARF1/HSPA9/P4HB/PAK2/CDC42	5
GO:0045454	GO:0045454	cell redox homeostasis	6/222	76/18670	0.000288692	0.00592802	0.00482764	GLRX2/GPX1/GLRX/P4HB/RAC2/TXNRD1	6
GO:0046785	GO:0046785	microtubule polymerization	6/222	76/18670	0.000288692	0.00592802	0.00482764	CSNK1D/DYRK1A/HSPA1A/HSPA1B/PAK1/RAC1	6
GO:0009161	GO:0009161	ribonucleoside monophosphate metabolic process	5/222	50/18670	0.00031147	0.00625363	0.00509281	ADSS2/AK4/GART/GMPS/UMPS	5
GO:0031113	GO:0031113	regulation of microtubule polymerization	5/222	50/18670	0.00031147	0.00625363	0.00509281	DYRK1A/HSPA1A/HSPA1B/PAK1/RAC1	5
GO:0006534	GO:0006534	cysteine metabolic process	3/222	12/18670	0.000337101	0.00669386	0.00545132	CBS/CBSL/CSAD	3
GO:0007271	GO:0007271	synaptic transmission, cholinergic	4/222	29/18670	0.000365909	0.00710966	0.00578994	CHRNB1/CHRNB2/CHRNB3/CHRNB4	4
GO:0031116	GO:0031116	positive regulation of microtubule polymerization	4/222	29/18670	0.000365909	0.00710966	0.00578994	HSPA1A/HSPA1B/PAK1/RAC1	4
GO:0032488	GO:0032488	Cdc42 protein signal transduction	3/222	13/18670	0.000434394	0.00826264	0.0067289	CDC42/RHOU/RHOV	3
GO:0070431	GO:0070431	nucleotide-binding oligomerization domain containing 2 signaling pathway	3/222	13/18670	0.000434394	0.00826264	0.0067289	HSPA1A/HSPA1B/RIPK2	3
GO:1903078	GO:1903078	positive regulation of protein localization to plasma membrane	5/222	56/18670	0.00053004	0.00997691	0.00812496	EPHA2/EPHA3/PIK3R1/RACK1/RHOG	5
GO:0006471	GO:0006471	protein ADP-ribosylation	4/222	33/18670	0.000607402	0.0109758	0.0089384	PARP1/PARP15/PARP2/KAT2B	4
GO:0009156	GO:0009156	ribonucleoside monophosphate biosynthetic process	4/222	33/18670	0.000607402	0.0109758	0.0089384	ADSS2/GART/GMPS/UMPS	4
GO:0010591	GO:0010591	regulation of lamellipodium assembly	4/222	33/18670	0.000607402	0.0109758	0.0089384	EPHA2/CDC42/RAC1/RAC2	4
GO:0031112	GO:0031112	positive regulation of microtubule polymerization or depolymerization	4/222	33/18670	0.000607402	0.0109758	0.0089384	HSPA1A/HSPA1B/PAK1/RAC1	4
GO:1903725	GO:1903725	regulation of phospholipid metabolic process	6/222	88/18670	0.000635976	0.0113783	0.00926623	ARF1/EPHA8/FABP3/PIK3R1/PIK3R2/PIK3R3	6
GO:0043652	GO:0043652	engulfment of apoptotic cell	3/222	15/18670	0.000679044	0.0119652	0.0097442	RAC3/RHOBTB1/RHOBTB2	3
GO:0006536	GO:0006536	glutamate metabolic process	4/222	34/18670	0.000682025	0.0119652	0.0097442	GLUL/GLS2/ALDH18A1/TAT	4
GO:0090083	GO:0090083	regulation of inclusion body assembly	3/222	16/18670	0.000828442	0.0143942	0.0117223	HSPA1A/HSPA1B/HSPA2	3
GO:0009167	GO:0009167	purine ribonucleoside monophosphate metabolic process	4/222	36/18670	0.000850346	0.0145187	0.0118237	ADSS2/AK4/GART/GMPS	4
GO:0036473	GO:0036473	cell death in response to oxidative stress	6/222	93/18670	0.000851676	0.0145187	0.0118237	GPX1/STK24/P4HB/PYCR1/PARP1/RACK1	6
GO:1904377	GO:1904377	positive regulation of protein localization to cell periphery	5/222	63/18670	0.000911918	0.0154003	0.0125417	EPHA2/EPHA3/PIK3R1/RACK1/RHOG	5
GO:0009126	GO:0009126	purine nucleoside monophosphate metabolic process	4/222	37/18670	0.000944614	0.0155013	0.0126239	ADSS2/AK4/GART/GMPS	4
GO:0051193	GO:0051193	regulation of cofactor metabolic process	4/222	37/18670	0.000944614	0.0155013	0.0126239	PDP1/PPTC7/RAC1/RAC2	4
GO:2000249	GO:2000249	regulation of actin cytoskeleton reorganization	4/222	37/18670	0.000944614	0.0155013	0.0126239	ABL2/CDC42/RHOD/DAPK3	4
GO:1903076	GO:1903076	regulation of protein localization to plasma membrane	6/222	95/18670	0.000952209	0.0155013	0.0126239	EPHA2/EPHA3/PIK3R1/RACK1/RHOG/RHOQ	6
GO:0030032	GO:0030032	lamellipodium assembly	5/222	64/18670	0.000979755	0.0158073	0.0128731	EPHA2/CDC42/RAC1/RAC2/RHOD	5
GO:0060263	GO:0060263	regulation of respiratory burst	3/222	17/18670	0.000997178	0.015946	0.0129861	IGHA1/RAC1/RAC2	3
GO:0046326	GO:0046326	positive regulation of glucose import	4/222	38/18670	0.001046	0.0164358	0.013385	PIK3R1/PTPN11/RHOQ/MAPK14	4
GO:0046825	GO:0046825	regulation of protein export from nucleus	4/222	38/18670	0.001046	0.0164358	0.013385	SFN/YWHAE/PPM1A/PTPN11	4
GO:0070301	GO:0070301	cellular response to hydrogen peroxide	6/222	99/18670	0.00118046	0.0183887	0.0149753	AQP1/FABP1/PYCR1/RACK1/RHOB/MAPK13	6
GO:0055024	GO:0055024	regulation of cardiac muscle tissue development	6/222	100/18670	0.00124356	0.0192061	0.015641	KAT2A/PAK1/PARP2/PIM1/MAPK11/MAPK14	6
GO:1901068	GO:1901068	guanosine-containing compound metabolic process	4/222	40/18670	0.00127126	0.0194675	0.0158539	AK4/GMPS/RHOA/RHOQ	4
GO:0009127	GO:0009127	purine nucleoside monophosphate biosynthetic process	3/222	19/18670	0.00139628	0.0210257	0.0171228	ADSS2/GART/GMPS	3
GO:0009168	GO:0009168	purine ribonucleoside monophosphate biosynthetic process	3/222	19/18670	0.00139628	0.0210257	0.0171228	ADSS2/GART/GMPS	3
GO:0010592	GO:0010592	positive regulation of lamellipodium assembly	3/222	20/18670	0.00162836	0.0241184	0.0196415	CDC42/RAC1/RAC2	3
GO:0070262	GO:0070262	peptidyl-serine dephosphorylation	3/222	20/18670	0.00162836	0.0241184	0.0196415	YWHAE/PPM1F/PPTC7	3
GO:0006635	GO:0006635	fatty acid beta-oxidation	5/222	72/18670	0.00166527	0.0241362	0.019656	ACAA1/ECHS1/MCAT/FABP1/ECI2	5
GO:0009123	GO:0009123	nucleoside monophosphate metabolic process	5/222	72/18670	0.00166527	0.0241362	0.019656	ADSS2/AK4/GART/GMPS/UMPS	5
GO:0008631	GO:0008631	intrinsic apoptotic signaling pathway in response to oxidative stress	4/222	43/18670	0.00166963	0.0241362	0.019656	GPX1/STK24/P4HB/PARP1	4
GO:0009124	GO:0009124	nucleoside monophosphate biosynthetic process	4/222	44/18670	0.00181968	0.0258911	0.0210851	ADSS2/GART/GMPS/UMPS	4
GO:0010828	GO:0010828	positive regulation of glucose transmembrane transport	4/222	44/18670	0.00181968	0.0258911	0.0210851	PIK3R1/PTPN11/RHOQ/MAPK14	4
GO:0006144	GO:0006144	purine nucleobase metabolic process	3/222	21/18670	0.0018832	0.0263794	0.0214827	GART/GMPS/GMPR	3
GO:0046827	GO:0046827	positive regulation of protein export from nucleus	3/222	21/18670	0.0018832	0.0263794	0.0214827	SFN/YWHAE/PPM1A	3
GO:1902743	GO:1902743	regulation of lamellipodium organization	4/222	45/18670	0.00197883	0.0275057	0.0224	EPHA2/CDC42/RAC1/RAC2	4
GO:1903201	GO:1903201	regulation of oxidative stress-induced cell death	5/222	75/18670	0.00199609	0.0275339	0.0224229	GPX1/P4HB/PYCR1/PARP1/RACK1	5
GO:0033628	GO:0033628	regulation of cell adhesion mediated by integrin	4/222	46/18670	0.00214734	0.0293958	0.0239392	EPHA2/EPHA8/PTPN11/RAC3	4
GO:0045646	GO:0045646	regulation of erythrocyte differentiation	4/222	47/18670	0.0023255	0.0315953	0.0257305	HSPA1A/HSPA1B/HSPA9/MAPK14	4
GO:0010827	GO:0010827	regulation of glucose transmembrane transport	5/222	78/18670	0.00237254	0.0317568	0.025862	FABP5/PIK3R1/PTPN11/RHOQ/MAPK14	5
GO:0055021	GO:0055021	regulation of cardiac muscle tissue growth	5/222	78/18670	0.00237254	0.0317568	0.025862	PAK1/PARP2/PIM1/MAPK11/MAPK14	5
GO:0070841	GO:0070841	inclusion body assembly	3/222	23/18670	0.00246414	0.0327405	0.0266631	HSPA1A/HSPA1B/HSPA2	3
GO:0031110	GO:0031110	regulation of microtubule polymerization or depolymerization	5/222	79/18670	0.00250876	0.03309	0.0269478	DYRK1A/HSPA1A/HSPA1B/PAK1/RAC1	5
GO:0035094	GO:0035094	response to nicotine	4/222	49/18670	0.00271185	0.0355095	0.0289182	CHRNB1/CHRNB2/CHRNB3/CHRNB4	4
GO:0009404	GO:0009404	toxin metabolic process	3/222	24/18670	0.00279166	0.0360324	0.029344	ACAA1/CBS/CBSL	3
GO:0099563	GO:0099563	modification of synaptic structure	3/222	24/18670	0.00279166	0.0360324	0.029344	EPHA4/CDC42/RHOA	3
GO:0097581	GO:0097581	lamellipodium organization	5/222	82/18670	0.00295151	0.0378254	0.0308041	EPHA2/CDC42/RAC1/RAC2/RHOD	5
GO:0009199	GO:0009199	ribonucleoside triphosphate metabolic process	5/222	83/18670	0.00311089	0.0389218	0.031697	AK4/CTPS1/PARP1/RHOA/RHOQ	5
GO:0090102	GO:0090102	cochlea development	4/222	51/18670	0.00314003	0.0389218	0.031697	EPHA4/GABRA5/GABRB2/GABRB3	4
GO:0046039	GO:0046039	GTP metabolic process	3/222	25/18670	0.00314476	0.0389218	0.031697	AK4/RHOA/RHOQ	3
GO:0060444	GO:0060444	branching involved in mammary gland duct morphogenesis	3/222	25/18670	0.00314476	0.0389218	0.031697	DDR1/ESR1/EPHA2	3
GO:1900101	GO:1900101	regulation of endoplasmic reticulum unfolded protein response	3/222	25/18670	0.00314476	0.0389218	0.031697	HSPA5/PIK3R1/RACK1	3
GO:0060420	GO:0060420	regulation of heart growth	5/222	84/18670	0.00327638	0.0402749	0.032799	PAK1/PARP2/PIM1/MAPK11/MAPK14	5
GO:0007020	GO:0007020	microtubule nucleation	3/222	26/18670	0.00352406	0.0430268	0.03504	CSNK1D/HSPA1A/HSPA1B	3
GO:0060384	GO:0060384	innervation	3/222	27/18670	0.00393013	0.047345	0.0385566	GABRA5/GABRB2/GABRB3	3
GO:1902175	GO:1902175	regulation of oxidative stress-induced intrinsic apoptotic signaling pathway	3/222	27/18670	0.00393013	0.047345	0.0385566	GPX1/P4HB/PARP1	3
GO:1900407	GO:1900407	regulation of cellular response to oxidative stress	5/222	88/18670	0.0040021	0.0478927	0.0390027	GPX1/P4HB/PYCR1/PARP1/RACK1	5
GO:0043551	GO:0043551	regulation of phosphatidylinositol 3-kinase activity	4/222	55/18670	0.00413028	0.0491014	0.039987	EPHA8/PIK3R1/PIK3R2/PIK3R3	4
GO:0008045	GO:0008045	motor neuron axon guidance	3/222	28/18670	0.00436354	0.0508704	0.0414277	EPHA4/RAC1/RAC2	3
GO:0033598	GO:0033598	mammary gland epithelial cell proliferation	3/222	28/18670	0.00436354	0.0508704	0.0414277	ESR1/EPHA2/GPX1	3
GO:1902745	GO:1902745	positive regulation of lamellipodium organization	3/222	28/18670	0.00436354	0.0508704	0.0414277	CDC42/RAC1/RAC2	3
GO:0006749	GO:0006749	glutathione metabolic process	4/222	56/18670	0.00440722	0.0510503	0.0415742	GLRX2/GPX1/GPX4/GSTT2	4
GO:0051899	GO:0051899	membrane depolarization	5/222	91/18670	0.004617	0.0531396	0.0432756	YWHAH/KCNH2/PARP1/RACK1/CHRNB2	5
GO:0042743	GO:0042743	hydrogen peroxide metabolic process	4/222	57/18670	0.00469641	0.0537115	0.0437414	GPX1/GPX3/RAC1/RAC2	4
GO:0031365	GO:0031365	N-terminal protein amino acid modification	3/222	29/18670	0.0048248	0.0548328	0.0446546	KAT2B/PPM1A/PPM1B	3
GO:0030520	GO:0030520	intracellular estrogen receptor signaling pathway	4/222	58/18670	0.00499809	0.0560966	0.0456837	ESR1/ESR2/PAK1/PARP1	4
GO:1904589	GO:1904589	regulation of protein import	4/222	58/18670	0.00499809	0.0560966	0.0456837	HSPA8/PIK3R1/PIK3R2/MAPK14	4
GO:0050690	GO:0050690	regulation of defense response to virus by virus	3/222	30/18670	0.00531442	0.0592787	0.0482752	ARF1/PAK2/RAC1	3
GO:0046128	GO:0046128	purine ribonucleoside metabolic process	4/222	60/18670	0.00563987	0.0610696	0.0497337	AK4/GMPS/RHOA/RHOQ	4
GO:0046324	GO:0046324	regulation of glucose import	4/222	60/18670	0.00563987	0.0610696	0.0497337	PIK3R1/PTPN11/RHOQ/MAPK14	4
GO:0044319	GO:0044319	wound healing, spreading of cells	3/222	31/18670	0.00583284	0.0610696	0.0497337	DDR1/RHOA/RHOC	3
GO:0045648	GO:0045648	positive regulation of erythrocyte differentiation	3/222	31/18670	0.00583284	0.0610696	0.0497337	HSPA1A/HSPA1B/MAPK14	3
GO:0090505	GO:0090505	epiboly involved in wound healing	3/222	31/18670	0.00583284	0.0610696	0.0497337	DDR1/RHOA/RHOC	3
GO:0006560	GO:0006560	proline metabolic process	2/222	10/18670	0.00594812	0.0610696	0.0497337	PYCR1/ALDH18A1	2
GO:0032464	GO:0032464	positive regulation of protein homooligomerization	2/222	10/18670	0.00594812	0.0610696	0.0497337	RACK1/RHOC	2
GO:0051901	GO:0051901	positive regulation of mitochondrial depolarization	2/222	10/18670	0.00594812	0.0610696	0.0497337	PARP1/RACK1	2
GO:0070391	GO:0070391	response to lipoteichoic acid	2/222	10/18670	0.00594812	0.0610696	0.0497337	RIPK2/MAPK14	2
GO:0071223	GO:0071223	cellular response to lipoteichoic acid	2/222	10/18670	0.00594812	0.0610696	0.0497337	RIPK2/MAPK14	2
GO:0072610	GO:0072610	interleukin-12 secretion	2/222	10/18670	0.00594812	0.0610696	0.0497337	MAPK11/MAPK14	2
GO:1903265	GO:1903265	positive regulation of tumor necrosis factor-mediated signaling pathway	2/222	10/18670	0.00594812	0.0610696	0.0497337	HSPA1A/HSPA1B	2
GO:1904338	GO:1904338	regulation of dopaminergic neuron differentiation	2/222	10/18670	0.00594812	0.0610696	0.0497337	CSNK1D/CSNK1E	2
GO:2001225	GO:2001225	regulation of chloride transport	2/222	10/18670	0.00594812	0.0610696	0.0497337	CA7/GABRE	2
GO:1902882	GO:1902882	regulation of response to oxidative stress	5/222	97/18670	0.00604342	0.0616975	0.050245	GPX1/P4HB/PYCR1/PARP1/RACK1	5
GO:0002042	GO:0002042	cell migration involved in sprouting angiogenesis	5/222	98/18670	0.00630813	0.0636993	0.0518752	MAP3K3/PIK3C2A/PIK3R3/RHOA/RHOJ	5
GO:0055025	GO:0055025	positive regulation of cardiac muscle tissue development	4/222	62/18670	0.00633443	0.0636993	0.0518752	KAT2A/PARP2/PIM1/MAPK14	4
GO:0090504	GO:0090504	epiboly	3/222	32/18670	0.0063805	0.0636993	0.0518752	DDR1/RHOA/RHOC	3
GO:1903955	GO:1903955	positive regulation of protein targeting to mitochondrion	3/222	32/18670	0.0063805	0.0636993	0.0518752	HSPA1L/RAC2/RHOU	3
GO:0030838	GO:0030838	positive regulation of actin filament polymerization	5/222	99/18670	0.00658088	0.0653387	0.0532104	ARF1/RAC3/RHOA/RHOBTB1/RHOBTB2	5
GO:0042278	GO:0042278	purine nucleoside metabolic process	4/222	63/18670	0.00670205	0.0661782	0.053894	AK4/GMPS/RHOA/RHOQ	4
GO:0060603	GO:0060603	mammary gland duct morphogenesis	3/222	33/18670	0.00695781	0.0682426	0.0555752	DDR1/ESR1/EPHA2	3
GO:0043550	GO:0043550	regulation of lipid kinase activity	4/222	64/18670	0.00708354	0.0682426	0.0555752	EPHA8/PIK3R1/PIK3R2/PIK3R3	4
GO:0007256	GO:0007256	activation of JNKK activity	2/222	11/18670	0.00721325	0.0682426	0.0555752	MAP3K10/RIPK2	2
GO:0009113	GO:0009113	purine nucleobase biosynthetic process	2/222	11/18670	0.00721325	0.0682426	0.0555752	GART/GMPS	2
GO:0033148	GO:0033148	positive regulation of intracellular estrogen receptor signaling pathway	2/222	11/18670	0.00721325	0.0682426	0.0555752	PAK1/PARP1	2
GO:0034379	GO:0034379	very-low-density lipoprotein particle assembly	2/222	11/18670	0.00721325	0.0682426	0.0555752	ARF1/P4HB	2
GO:0046689	GO:0046689	response to mercury ion	2/222	11/18670	0.00721325	0.0682426	0.0555752	AQP1/TAT	2
GO:1900102	GO:1900102	negative regulation of endoplasmic reticulum unfolded protein response	2/222	11/18670	0.00721325	0.0682426	0.0555752	HSPA5/RACK1	2
GO:0033120	GO:0033120	positive regulation of RNA splicing	3/222	34/18670	0.00756515	0.0711991	0.0579829	DYRK1A/HSPA1A/PIK3R1	3
GO:0032735	GO:0032735	positive regulation of interleukin-12 production	3/222	35/18670	0.00820286	0.0760131	0.0619033	RIPK2/MAPK11/MAPK14	3
GO:0070423	GO:0070423	nucleotide-binding oligomerization domain containing signaling pathway	3/222	35/18670	0.00820286	0.0760131	0.0619033	HSPA1A/HSPA1B/RIPK2	3
GO:2001024	GO:2001024	negative regulation of response to drug	3/222	35/18670	0.00820286	0.0760131	0.0619033	PYCR1/PTPN11/RACK1	3
GO:0002551	GO:0002551	mast cell chemotaxis	2/222	12/18670	0.00858848	0.0760754	0.061954	RAC1/RAC2	2
GO:0010826	GO:0010826	negative regulation of centrosome duplication	2/222	12/18670	0.00858848	0.0760754	0.061954	KAT2A/KAT2B	2
GO:0051196	GO:0051196	regulation of coenzyme metabolic process	2/222	12/18670	0.00858848	0.0760754	0.061954	PDP1/PPTC7	2
GO:0072178	GO:0072178	nephric duct morphogenesis	2/222	12/18670	0.00858848	0.0760754	0.061954	EPHA4/EPHA7	2
GO:0097531	GO:0097531	mast cell migration	2/222	12/18670	0.00858848	0.0760754	0.061954	RAC1/RAC2	2
GO:1904181	GO:1904181	positive regulation of membrane depolarization	2/222	12/18670	0.00858848	0.0760754	0.061954	PARP1/RACK1	2
GO:1904424	GO:1904424	regulation of GTP binding	2/222	12/18670	0.00858848	0.0760754	0.061954	CSNK1A1/EPHA4	2
GO:1904953	GO:1904953	Wnt signaling pathway involved in midbrain dopaminergic neuron differentiation	2/222	12/18670	0.00858848	0.0760754	0.061954	CSNK1D/CSNK1E	2
GO:1905244	GO:1905244	regulation of modification of synaptic structure	2/222	12/18670	0.00858848	0.0760754	0.061954	EPHA4/RHOA	2
GO:0033627	GO:0033627	cell adhesion mediated by integrin	4/222	68/18670	0.00875227	0.0767736	0.0625226	EPHA2/EPHA8/PTPN11/RAC3	4
GO:0046323	GO:0046323	glucose import	4/222	68/18670	0.00875227	0.0767736	0.0625226	PIK3R1/PTPN11/RHOQ/MAPK14	4
GO:0035872	GO:0035872	nucleotide-binding domain, leucine rich repeat containing receptor signaling pathway	3/222	36/18670	0.00887127	0.0774414	0.0630665	HSPA1A/HSPA1B/RIPK2	3
GO:0038083	GO:0038083	peptidyl-tyrosine autophosphorylation	3/222	37/18670	0.00957068	0.0815765	0.066434	ABL2/DDR1/DYRK1A	3
GO:0042307	GO:0042307	positive regulation of protein import into nucleus	3/222	37/18670	0.00957068	0.0815765	0.066434	PIK3R1/PIK3R2/MAPK14	3
GO:0045730	GO:0045730	respiratory burst	3/222	37/18670	0.00957068	0.0815765	0.066434	IGHA1/RAC1/RAC2	3
GO:0090050	GO:0090050	positive regulation of cell migration involved in sprouting angiogenesis	3/222	37/18670	0.00957068	0.0815765	0.066434	MAP3K3/PIK3C2A/RHOJ	3
GO:1900026	GO:1900026	positive regulation of substrate adhesion-dependent cell spreading	3/222	37/18670	0.00957068	0.0815765	0.066434	CDC42/RAC1/RAC3	3
GO:0007183	GO:0007183	SMAD protein complex assembly	2/222	13/18670	0.010071	0.0830975	0.0676727	PARP1/PPM1A	2
GO:0010763	GO:0010763	positive regulation of fibroblast migration	2/222	13/18670	0.010071	0.0830975	0.0676727	PAK1/PAK3	2
GO:0016322	GO:0016322	neuron remodeling	2/222	13/18670	0.010071	0.0830975	0.0676727	EPHA8/RND1	2
GO:0033145	GO:0033145	positive regulation of intracellular steroid hormone receptor signaling pathway	2/222	13/18670	0.010071	0.0830975	0.0676727	PAK1/PARP1	2
GO:0042178	GO:0042178	xenobiotic catabolic process	2/222	13/18670	0.010071	0.0830975	0.0676727	ACAA1/CRYZ	2
GO:0046040	GO:0046040	IMP metabolic process	2/222	13/18670	0.010071	0.0830975	0.0676727	ADSS2/GART	2
GO:2000052	GO:2000052	positive regulation of non-canonical Wnt signaling pathway	2/222	13/18670	0.010071	0.0830975	0.0676727	CSNK1D/CSNK1E	2
GO:0006084	GO:0006084	acetyl-CoA metabolic process	3/222	38/18670	0.0103014	0.0846116	0.0689058	AASS/FASN/PDP1	3
GO:0000281	GO:0000281	mitotic cytokinesis	4/222	72/18670	0.010659	0.0859856	0.0700247	ARF1/RHOA/RHOB/RHOC	4
GO:0051155	GO:0051155	positive regulation of striated muscle cell differentiation	4/222	72/18670	0.010659	0.0859856	0.0700247	KAT2A/MYLK3/PARP2/MAPK14	4
GO:0060193	GO:0060193	positive regulation of lipase activity	4/222	72/18670	0.010659	0.0859856	0.0700247	ABL2/ESR1/RHOA/RHOC	4
GO:0061180	GO:0061180	mammary gland epithelium development	4/222	72/18670	0.010659	0.0859856	0.0700247	DDR1/ESR1/EPHA2/GPX1	4
GO:0033146	GO:0033146	regulation of intracellular estrogen receptor signaling pathway	3/222	39/18670	0.0110636	0.0884597	0.0720395	ESR1/PAK1/PARP1	3
GO:1904591	GO:1904591	positive regulation of protein import	3/222	39/18670	0.0110636	0.0884597	0.0720395	PIK3R1/PIK3R2/MAPK14	3
GO:0009071	GO:0009071	serine family amino acid catabolic process	2/222	14/18670	0.0116582	0.0896249	0.0729884	CBS/CSAD	2
GO:0045198	GO:0045198	establishment of epithelial cell apical/basal polarity	2/222	14/18670	0.0116582	0.0896249	0.0729884	CDC42/RHOA	2
GO:0046033	GO:0046033	AMP metabolic process	2/222	14/18670	0.0116582	0.0896249	0.0729884	ADSS2/AK4	2
GO:0046606	GO:0046606	negative regulation of centrosome cycle	2/222	14/18670	0.0116582	0.0896249	0.0729884	KAT2A/KAT2B	2
GO:0050667	GO:0050667	homocysteine metabolic process	2/222	14/18670	0.0116582	0.0896249	0.0729884	CBS/CBSL	2
GO:0051645	GO:0051645	Golgi localization	2/222	14/18670	0.0116582	0.0896249	0.0729884	YWHAZ/CDC42	2
GO:0097202	GO:0097202	activation of cysteine-type endopeptidase activity	2/222	14/18670	0.0116582	0.0896249	0.0729884	ASPH/RIPK2	2
GO:0009119	GO:0009119	ribonucleoside metabolic process	4/222	74/18670	0.0117053	0.0896249	0.0729884	AK4/GMPS/RHOA/RHOQ	4
GO:0043507	GO:0043507	positive regulation of JUN kinase activity	4/222	74/18670	0.0117053	0.0896249	0.0729884	EPHA4/MAP3K10/PAK1/RIPK2	4
GO:1900182	GO:1900182	positive regulation of protein localization to nucleus	4/222	74/18670	0.0117053	0.0896249	0.0729884	PARP1/PIK3R1/PIK3R2/MAPK14	4
GO:1900371	GO:1900371	regulation of purine nucleotide biosynthetic process	3/222	40/18670	0.0118575	0.0904076	0.0736258	AK4/PARP1/PDP1	3
GO:0033143	GO:0033143	regulation of intracellular steroid hormone receptor signaling pathway	4/222	75/18670	0.0122523	0.0930248	0.0757572	ESR1/PAK1/PARP1/RHOA	4
GO:0000096	GO:0000096	sulfur amino acid metabolic process	3/222	41/18670	0.0126835	0.0950998	0.0774471	CBS/CBSL/CSAD	3
GO:0030808	GO:0030808	regulation of nucleotide biosynthetic process	3/222	41/18670	0.0126835	0.0950998	0.0774471	AK4/PARP1/PDP1	3
GO:0060119	GO:0060119	inner ear receptor cell development	3/222	41/18670	0.0126835	0.0950998	0.0774471	GABRA5/GABRB2/GABRB3	3
GO:0000098	GO:0000098	sulfur amino acid catabolic process	2/222	15/18670	0.0133473	0.0983917	0.0801279	CBS/CSAD	2
GO:0009263	GO:0009263	deoxyribonucleotide biosynthetic process	2/222	15/18670	0.0133473	0.0983917	0.0801279	RRM2B/RRM2	2
GO:0033540	GO:0033540	fatty acid beta-oxidation using acyl-CoA oxidase	2/222	15/18670	0.0133473	0.0983917	0.0801279	ACAA1/ECI2	2
GO:0042921	GO:0042921	glucocorticoid receptor signaling pathway	2/222	15/18670	0.0133473	0.0983917	0.0801279	YWHAH/NR3C1	2
GO:0009205	GO:0009205	purine ribonucleoside triphosphate metabolic process	4/222	77/18670	0.0133948	0.0983917	0.0801279	AK4/PARP1/RHOA/RHOQ	4
GO:0021954	GO:0021954	central nervous system neuron development	4/222	78/18670	0.0139906	0.102352	0.0833532	EPHA4/GABRB1/RAC3/CHRNB2	4
GO:0021675	GO:0021675	nerve development	4/222	79/18670	0.0146029	0.106401	0.0866507	GABRA5/GABRB2/GABRB3/CHRNB2	4
GO:0006103	GO:0006103	2-oxoglutarate metabolic process	2/222	16/18670	0.0151357	0.107128	0.0872425	GPT2/TAT	2
GO:0006206	GO:0006206	pyrimidine nucleobase metabolic process	2/222	16/18670	0.0151357	0.107128	0.0872425	CTPS1/UMPS	2
GO:0019372	GO:0019372	lipoxygenase pathway	2/222	16/18670	0.0151357	0.107128	0.0872425	GPX1/GPX4	2
GO:0031958	GO:0031958	corticosteroid receptor signaling pathway	2/222	16/18670	0.0151357	0.107128	0.0872425	YWHAH/NR3C1	2
GO:0042447	GO:0042447	hormone catabolic process	2/222	16/18670	0.0151357	0.107128	0.0872425	YWHAH/ACAA1	2
GO:0048012	GO:0048012	hepatocyte growth factor receptor signaling pathway	2/222	16/18670	0.0151357	0.107128	0.0872425	PAK1/RAC1	2
GO:0072176	GO:0072176	nephric duct development	2/222	16/18670	0.0151357	0.107128	0.0872425	EPHA4/EPHA7	2
GO:0097061	GO:0097061	dendritic spine organization	4/222	80/18670	0.015232	0.107128	0.0872425	ARF1/EPHA4/PAK3/CDC42	4
GO:0071622	GO:0071622	regulation of granulocyte chemotaxis	3/222	44/18670	0.0153548	0.107128	0.0872425	RAC1/RAC2/MAPK14	3
GO:1903214	GO:1903214	regulation of protein targeting to mitochondrion	3/222	44/18670	0.0153548	0.107128	0.0872425	HSPA1L/RAC2/RHOU	3
GO:1903573	GO:1903573	negative regulation of response to endoplasmic reticulum stress	3/222	44/18670	0.0153548	0.107128	0.0872425	HSPA5/HSPA1A/RACK1	3
GO:1903533	GO:1903533	regulation of protein targeting	4/222	81/18670	0.0158779	0.110352	0.0898678	HSPA1L/PAK1/RAC2/RHOU	4
GO:0034644	GO:0034644	cellular response to UV	4/222	82/18670	0.0165408	0.114081	0.092905	AQP1/PARP1/PIK3R1/MAPK13	4
GO:0090049	GO:0090049	regulation of cell migration involved in sprouting angiogenesis	4/222	82/18670	0.0165408	0.114081	0.092905	MAP3K3/PIK3C2A/RHOA/RHOJ	4
GO:0000097	GO:0000097	sulfur amino acid biosynthetic process	2/222	17/18670	0.0170209	0.115194	0.093811	CBS/CBSL	2
GO:0006544	GO:0006544	glycine metabolic process	2/222	17/18670	0.0170209	0.115194	0.093811	GART/PHGDH	2
GO:0034501	GO:0034501	protein localization to kinetochore	2/222	17/18670	0.0170209	0.115194	0.093811	HASPIN/TTK	2
GO:0043649	GO:0043649	dicarboxylic acid catabolic process	2/222	17/18670	0.0170209	0.115194	0.093811	ALDH1L1/GLUL	2
GO:1904948	GO:1904948	midbrain dopaminergic neuron differentiation	2/222	17/18670	0.0170209	0.115194	0.093811	CSNK1D/CSNK1E	2
GO:0019731	GO:0019731	antibacterial humoral response	3/222	46/18670	0.0172983	0.115771	0.0942811	IGHA1/IGHM/IGKV3-20	3
GO:0043277	GO:0043277	apoptotic cell clearance	3/222	46/18670	0.0172983	0.115771	0.0942811	RAC3/RHOBTB1/RHOBTB2	3
GO:0060443	GO:0060443	mammary gland morphogenesis	3/222	46/18670	0.0172983	0.115771	0.0942811	DDR1/ESR1/EPHA2	3
GO:1905897	GO:1905897	regulation of response to endoplasmic reticulum stress	4/222	84/18670	0.017918	0.119476	0.0972982	HSPA5/HSPA1A/PIK3R1/RACK1	4
GO:0042551	GO:0042551	neuron maturation	3/222	47/18670	0.0183192	0.121256	0.0987479	EPHA8/RAC3/RND1	3
GO:2001239	GO:2001239	regulation of extrinsic apoptotic signaling pathway in absence of ligand	3/222	47/18670	0.0183192	0.121256	0.0987479	HSPA1A/HSPA1B/DAPK3	3
GO:0009144	GO:0009144	purine nucleoside triphosphate metabolic process	4/222	85/18670	0.0186326	0.12288	0.100071	AK4/PARP1/RHOA/RHOQ	4
GO:0035089	GO:0035089	establishment of apical/basal cell polarity	2/222	18/18670	0.0190002	0.123501	0.100577	CDC42/RHOA	2
GO:0043555	GO:0043555	regulation of translation in response to stress	2/222	18/18670	0.0190002	0.123501	0.100577	RPS6KA1/RPS6KA3	2
GO:0060749	GO:0060749	mammary gland alveolus development	2/222	18/18670	0.0190002	0.123501	0.100577	DDR1/ESR1	2
GO:0061377	GO:0061377	mammary gland lobule development	2/222	18/18670	0.0190002	0.123501	0.100577	DDR1/ESR1	2
GO:0008038	GO:0008038	neuron recognition	3/222	48/18670	0.0193729	0.12458	0.101455	YWHAZ/EPHA4/EPHA3	3
GO:0032648	GO:0032648	regulation of interferon-beta production	3/222	48/18670	0.0193729	0.12458	0.101455	PPM1B/PTPN11/RIPK2	3
GO:0055023	GO:0055023	positive regulation of cardiac muscle tissue growth	3/222	48/18670	0.0193729	0.12458	0.101455	PARP2/PIM1/MAPK14	3
GO:0045844	GO:0045844	positive regulation of striated muscle tissue development	4/222	87/18670	0.0201142	0.128432	0.104592	KAT2A/PARP2/PIM1/MAPK14	4
GO:0048636	GO:0048636	positive regulation of muscle organ development	4/222	87/18670	0.0201142	0.128432	0.104592	KAT2A/PARP2/PIM1/MAPK14	4
GO:0043506	GO:0043506	regulation of JUN kinase activity	4/222	88/18670	0.0208814	0.129951	0.105829	EPHA4/MAP3K10/PAK1/RIPK2	4
GO:0106027	GO:0106027	neuron projection organization	4/222	88/18670	0.0208814	0.129951	0.105829	ARF1/EPHA4/PAK3/CDC42	4
GO:1901863	GO:1901863	positive regulation of muscle tissue development	4/222	88/18670	0.0208814	0.129951	0.105829	KAT2A/PARP2/PIM1/MAPK14	4
GO:0003159	GO:0003159	morphogenesis of an endothelium	2/222	19/18670	0.0210712	0.129951	0.105829	RHOA/RHOB	2
GO:0030859	GO:0030859	polarized epithelial cell differentiation	2/222	19/18670	0.0210712	0.129951	0.105829	CDC42/RHOA	2
GO:0046653	GO:0046653	tetrahydrofolate metabolic process	2/222	19/18670	0.0210712	0.129951	0.105829	ALDH1L1/GART	2
GO:0051131	GO:0051131	chaperone-mediated protein complex assembly	2/222	19/18670	0.0210712	0.129951	0.105829	HSPA1A/HSPA4	2
GO:0061154	GO:0061154	endothelial tube morphogenesis	2/222	19/18670	0.0210712	0.129951	0.105829	RHOA/RHOB	2
GO:1902074	GO:1902074	response to salt	2/222	19/18670	0.0210712	0.129951	0.105829	HSPA5/MAPK13	2
GO:2001169	GO:2001169	regulation of ATP biosynthetic process	2/222	19/18670	0.0210712	0.129951	0.105829	AK4/PARP1	2
GO:0001961	GO:0001961	positive regulation of cytokine-mediated signaling pathway	3/222	50/18670	0.021579	0.131734	0.107281	HSPA1A/HSPA1B/RIPK2	3
GO:0032608	GO:0032608	interferon-beta production	3/222	50/18670	0.021579	0.131734	0.107281	PPM1B/PTPN11/RIPK2	3
GO:2000725	GO:2000725	regulation of cardiac muscle cell differentiation	3/222	50/18670	0.021579	0.131734	0.107281	KAT2A/PAK1/PARP2	3
GO:0001954	GO:0001954	positive regulation of cell-matrix adhesion	3/222	51/18670	0.0227315	0.137838	0.112252	EPHA1/PPM1F/RAC1	3
GO:0009066	GO:0009066	aspartate family amino acid metabolic process	3/222	51/18670	0.0227315	0.137838	0.112252	AASS/ADSS2/PHGDH	3
GO:0032462	GO:0032462	regulation of protein homooligomerization	2/222	20/18670	0.0232316	0.137984	0.112371	RACK1/RHOC	2
GO:0032495	GO:0032495	response to muramyl dipeptide	2/222	20/18670	0.0232316	0.137984	0.112371	RIPK2/MAPK14	2
GO:0033194	GO:0033194	response to hydroperoxide	2/222	20/18670	0.0232316	0.137984	0.112371	GPX1/GPX3	2
GO:0048670	GO:0048670	regulation of collateral sprouting	2/222	20/18670	0.0232316	0.137984	0.112371	EPHA7/RND2	2
GO:0061162	GO:0061162	establishment of monopolar cell polarity	2/222	20/18670	0.0232316	0.137984	0.112371	CDC42/RHOA	2
GO:1901673	GO:1901673	regulation of mitotic spindle assembly	2/222	20/18670	0.0232316	0.137984	0.112371	HSPA1A/HSPA1B	2
GO:0048814	GO:0048814	regulation of dendrite morphogenesis	4/222	91/18670	0.0232901	0.137984	0.112371	YWHAH/EPHA4/PAK3/CHRNB2	4
GO:0060421	GO:0060421	positive regulation of heart growth	3/222	52/18670	0.0239168	0.140774	0.114643	PARP2/PIM1/MAPK14	3
GO:1900024	GO:1900024	regulation of substrate adhesion-dependent cell spreading	3/222	52/18670	0.0239168	0.140774	0.114643	CDC42/RAC1/RAC3	3
GO:0000186	GO:0000186	activation of MAPKK activity	3/222	53/18670	0.0251351	0.145697	0.118652	MAP3K3/MAP3K10/RIPK2	3
GO:0098586	GO:0098586	cellular response to virus	3/222	53/18670	0.0251351	0.145697	0.118652	ARF1/MAPK11/MAPK14	3
GO:0009081	GO:0009081	branched-chain amino acid metabolic process	2/222	21/18670	0.0254788	0.145697	0.118652	HIBADH/ACADSB	2
GO:0009083	GO:0009083	branched-chain amino acid catabolic process	2/222	21/18670	0.0254788	0.145697	0.118652	HIBADH/ACADSB	2
GO:0010310	GO:0010310	regulation of hydrogen peroxide metabolic process	2/222	21/18670	0.0254788	0.145697	0.118652	RAC1/RAC2	2
GO:0051900	GO:0051900	regulation of mitochondrial depolarization	2/222	21/18670	0.0254788	0.145697	0.118652	PARP1/RACK1	2
GO:0061339	GO:0061339	establishment or maintenance of monopolar cell polarity	2/222	21/18670	0.0254788	0.145697	0.118652	CDC42/RHOA	2
GO:0071459	GO:0071459	protein localization to chromosome, centromeric region	2/222	21/18670	0.0254788	0.145697	0.118652	HASPIN/TTK	2
GO:1902307	GO:1902307	positive regulation of sodium ion transmembrane transport	2/222	21/18670	0.0254788	0.145697	0.118652	ARF1/GLRX	2
GO:1901216	GO:1901216	positive regulation of neuron death	4/222	94/18670	0.0258609	0.147415	0.120052	EPHA7/PAK3/PARP1/RHOA	4
GO:0032655	GO:0032655	regulation of interleukin-12 production	3/222	54/18670	0.0263863	0.149937	0.122105	RIPK2/MAPK11/MAPK14	3
GO:0097711	GO:0097711	ciliary basal body-plasma membrane docking	4/222	95/18670	0.0267543	0.151552	0.12342	YWHAE/YWHAG/CSNK1D/CSNK1E	4
GO:0019217	GO:0019217	regulation of fatty acid metabolic process	4/222	96/18670	0.0276659	0.15368	0.125154	FABP1/FABP3/FABP5/PDP1	4
GO:0097327	GO:0097327	response to antineoplastic agent	4/222	96/18670	0.0276659	0.15368	0.125154	AQP1/NR3C1/PTGR1/MAPK13	4
GO:0002011	GO:0002011	morphogenesis of an epithelial sheet	3/222	55/18670	0.0276703	0.15368	0.125154	DDR1/RHOA/RHOC	3
GO:0042306	GO:0042306	regulation of protein import into nucleus	3/222	55/18670	0.0276703	0.15368	0.125154	PIK3R1/PIK3R2/MAPK14	3
GO:0003094	GO:0003094	glomerular filtration	2/222	22/18670	0.0278105	0.15368	0.125154	IGHA1/IGKV3-20	2
GO:0009220	GO:0009220	pyrimidine ribonucleotide biosynthetic process	2/222	22/18670	0.0278105	0.15368	0.125154	CTPS1/UMPS	2
GO:0046599	GO:0046599	regulation of centriole replication	2/222	22/18670	0.0278105	0.15368	0.125154	KAT2A/KAT2B	2
GO:0046628	GO:0046628	positive regulation of insulin receptor signaling pathway	2/222	22/18670	0.0278105	0.15368	0.125154	PAK1/PTPN11	2
GO:0030316	GO:0030316	osteoclast differentiation	4/222	97/18670	0.0285959	0.156825	0.127715	CAMK4/EPHA2/PIK3R1/MAPK14	4
GO:0010332	GO:0010332	response to gamma radiation	3/222	56/18670	0.0289871	0.156825	0.127715	GPX1/HSPA5/PARP1	3
GO:0032615	GO:0032615	interleukin-12 production	3/222	56/18670	0.0289871	0.156825	0.127715	RIPK2/MAPK11/MAPK14	3
GO:0046148	GO:0046148	pigment biosynthetic process	3/222	56/18670	0.0289871	0.156825	0.127715	ALAS2/GART/GMPS	3
GO:0060113	GO:0060113	inner ear receptor cell differentiation	3/222	56/18670	0.0289871	0.156825	0.127715	GABRA5/GABRB2/GABRB3	3
GO:0090307	GO:0090307	mitotic spindle assembly	3/222	56/18670	0.0289871	0.156825	0.127715	HSPA1A/HSPA1B/RHOA	3
GO:1903202	GO:1903202	negative regulation of oxidative stress-induced cell death	3/222	56/18670	0.0289871	0.156825	0.127715	GPX1/PYCR1/RACK1	3
GO:0006626	GO:0006626	protein targeting to mitochondrion	4/222	98/18670	0.0295443	0.157072	0.127916	HSPA1L/HSPA4/RAC2/RHOU	4
GO:0060191	GO:0060191	regulation of lipase activity	4/222	98/18670	0.0295443	0.157072	0.127916	ABL2/ESR1/RHOA/RHOC	4
GO:0007413	GO:0007413	axonal fasciculation	2/222	23/18670	0.0302244	0.157072	0.127916	EPHA4/EPHA3	2
GO:0009226	GO:0009226	nucleotide-sugar biosynthetic process	2/222	23/18670	0.0302244	0.157072	0.127916	GMDS/TSTA3	2
GO:0051882	GO:0051882	mitochondrial depolarization	2/222	23/18670	0.0302244	0.157072	0.127916	PARP1/RACK1	2
GO:0097205	GO:0097205	renal filtration	2/222	23/18670	0.0302244	0.157072	0.127916	IGHA1/IGKV3-20	2
GO:0106030	GO:0106030	neuron projection fasciculation	2/222	23/18670	0.0302244	0.157072	0.127916	EPHA4/EPHA3	2
GO:1901032	GO:1901032	negative regulation of response to reactive oxygen species	2/222	23/18670	0.0302244	0.157072	0.127916	PYCR1/RACK1	2
GO:1902410	GO:1902410	mitotic cytokinetic process	2/222	23/18670	0.0302244	0.157072	0.127916	ARF1/RHOA	2
GO:1903206	GO:1903206	negative regulation of hydrogen peroxide-induced cell death	2/222	23/18670	0.0302244	0.157072	0.127916	PYCR1/RACK1	2
GO:2000050	GO:2000050	regulation of non-canonical Wnt signaling pathway	2/222	23/18670	0.0302244	0.157072	0.127916	CSNK1D/CSNK1E	2
GO:0043525	GO:0043525	positive regulation of neuron apoptotic process	3/222	57/18670	0.0303365	0.157072	0.127916	EPHA7/PAK3/RHOA	3
GO:0060043	GO:0060043	regulation of cardiac muscle cell proliferation	3/222	57/18670	0.0303365	0.157072	0.127916	PIM1/MAPK11/MAPK14	3
GO:0060760	GO:0060760	positive regulation of response to cytokine stimulus	3/222	57/18670	0.0303365	0.157072	0.127916	HSPA1A/HSPA1B/RIPK2	3
GO:1900408	GO:1900408	negative regulation of cellular response to oxidative stress	3/222	57/18670	0.0303365	0.157072	0.127916	GPX1/PYCR1/RACK1	3
GO:0034446	GO:0034446	substrate adhesion-dependent cell spreading	4/222	100/18670	0.0314966	0.16123	0.131302	EPHA1/CDC42/RAC1/RAC3	4
GO:0060079	GO:0060079	excitatory postsynaptic potential	4/222	100/18670	0.0314966	0.16123	0.131302	CHRNB1/CHRNB2/CHRNB3/CHRNB4	4
GO:0061640	GO:0061640	cytoskeleton-dependent cytokinesis	4/222	100/18670	0.0314966	0.16123	0.131302	ARF1/RHOA/RHOB/RHOC	4
GO:0120034	GO:0120034	positive regulation of plasma membrane bounded cell projection assembly	4/222	100/18670	0.0314966	0.16123	0.131302	CDC42/RAC1/RAC2/RHOQ	4
GO:0060997	GO:0060997	dendritic spine morphogenesis	3/222	58/18670	0.0317186	0.161908	0.131854	EPHA4/PAK3/CDC42	3
GO:0009218	GO:0009218	pyrimidine ribonucleotide metabolic process	2/222	24/18670	0.0327183	0.165145	0.13449	CTPS1/UMPS	2
GO:0018126	GO:0018126	protein hydroxylation	2/222	24/18670	0.0327183	0.165145	0.13449	ASPH/P4HB	2
GO:0090023	GO:0090023	positive regulation of neutrophil chemotaxis	2/222	24/18670	0.0327183	0.165145	0.13449	RAC1/RAC2	2
GO:1900078	GO:1900078	positive regulation of cellular response to insulin stimulus	2/222	24/18670	0.0327183	0.165145	0.13449	PAK1/PTPN11	2
GO:1902883	GO:1902883	negative regulation of response to oxidative stress	3/222	59/18670	0.0331333	0.166774	0.135817	GPX1/PYCR1/RACK1	3
GO:0014829	GO:0014829	vascular smooth muscle contraction	2/222	25/18670	0.0352899	0.175189	0.14267	PIK3C2A/RHOA	2
GO:0021952	GO:0021952	central nervous system projection neuron axonogenesis	2/222	25/18670	0.0352899	0.175189	0.14267	EPHA4/CHRNB2	2
GO:0032461	GO:0032461	positive regulation of protein oligomerization	2/222	25/18670	0.0352899	0.175189	0.14267	RACK1/RHOC	2
GO:0051894	GO:0051894	positive regulation of focal adhesion assembly	2/222	25/18670	0.0352899	0.175189	0.14267	PPM1F/RAC1	2
GO:0061050	GO:0061050	regulation of cell growth involved in cardiac muscle cell development	2/222	25/18670	0.0352899	0.175189	0.14267	PAK1/PARP2	2
GO:0010803	GO:0010803	regulation of tumor necrosis factor-mediated signaling pathway	3/222	61/18670	0.0360596	0.178032	0.144985	HSPA1A/HSPA1B/RACK1	3
GO:0042490	GO:0042490	mechanoreceptor differentiation	3/222	61/18670	0.0360596	0.178032	0.144985	GABRA5/GABRB2/GABRB3	3
GO:0002753	GO:0002753	cytoplasmic pattern recognition receptor signaling pathway	3/222	62/18670	0.037571	0.18428	0.150074	HSPA1A/HSPA1B/RIPK2	3
GO:1902305	GO:1902305	regulation of sodium ion transmembrane transport	3/222	62/18670	0.037571	0.18428	0.150074	YWHAH/ARF1/GLRX	3
GO:0071624	GO:0071624	positive regulation of granulocyte chemotaxis	2/222	26/18670	0.0379371	0.18428	0.150074	RAC1/RAC2	2
GO:0150117	GO:0150117	positive regulation of cell-substrate junction organization	2/222	26/18670	0.0379371	0.18428	0.150074	PPM1F/RAC1	2
GO:1903203	GO:1903203	regulation of oxidative stress-induced neuron death	2/222	26/18670	0.0379371	0.18428	0.150074	PARP1/RACK1	2
GO:1903579	GO:1903579	negative regulation of ATP metabolic process	2/222	26/18670	0.0379371	0.18428	0.150074	PARP1/RHOA	2
GO:0046622	GO:0046622	positive regulation of organ growth	3/222	63/18670	0.0391145	0.18949	0.154316	PARP2/PIM1/MAPK14	3
GO:0036475	GO:0036475	neuron death in response to oxidative stress	2/222	27/18670	0.0406576	0.194001	0.15799	PARP1/RACK1	2
GO:0048668	GO:0048668	collateral sprouting	2/222	27/18670	0.0406576	0.194001	0.15799	EPHA7/RND2	2
GO:0090169	GO:0090169	regulation of spindle assembly	2/222	27/18670	0.0406576	0.194001	0.15799	HSPA1A/HSPA1B	2
GO:2001039	GO:2001039	negative regulation of cellular response to drug	2/222	27/18670	0.0406576	0.194001	0.15799	PYCR1/RACK1	2
GO:0043297	GO:0043297	apical junction assembly	3/222	64/18670	0.0406898	0.194001	0.15799	EPHA2/RHOA/RHOC	3
GO:1903672	GO:1903672	positive regulation of sprouting angiogenesis	3/222	64/18670	0.0406898	0.194001	0.15799	MAP3K3/PIK3C2A/RHOJ	3
GO:0006940	GO:0006940	regulation of smooth muscle contraction	3/222	65/18670	0.0422967	0.200604	0.163367	RHOA/DAPK3/CHRNB4	3
GO:0051187	GO:0051187	cofactor catabolic process	3/222	65/18670	0.0422967	0.200604	0.163367	ALDH1L1/GPX1/GPX3	3
GO:0006760	GO:0006760	folic acid-containing compound metabolic process	2/222	28/18670	0.0434495	0.202876	0.165218	ALDH1L1/GART	2
GO:0009065	GO:0009065	glutamine family amino acid catabolic process	2/222	28/18670	0.0434495	0.202876	0.165218	GLUL/GLS2	2
GO:0033137	GO:0033137	negative regulation of peptidyl-serine phosphorylation	2/222	28/18670	0.0434495	0.202876	0.165218	PPM1F/RACK1	2
GO:0034377	GO:0034377	plasma lipoprotein particle assembly	2/222	28/18670	0.0434495	0.202876	0.165218	ARF1/P4HB	2
GO:0048679	GO:0048679	regulation of axon regeneration	2/222	28/18670	0.0434495	0.202876	0.165218	EPHA4/STK24	2
GO:0086013	GO:0086013	membrane repolarization during cardiac muscle cell action potential	2/222	28/18670	0.0434495	0.202876	0.165218	YWHAE/KCNH2	2
GO:0019748	GO:0019748	secondary metabolic process	3/222	66/18670	0.0439352	0.203566	0.16578	ACAA1/CBS/CBSL	3
GO:0046626	GO:0046626	regulation of insulin receptor signaling pathway	3/222	66/18670	0.0439352	0.203566	0.16578	PAK1/PIK3R1/PTPN11	3
GO:1905207	GO:1905207	regulation of cardiocyte differentiation	3/222	66/18670	0.0439352	0.203566	0.16578	KAT2A/PAK1/PARP2	3
GO:0060038	GO:0060038	cardiac muscle cell proliferation	3/222	67/18670	0.045605	0.210763	0.17164	PIM1/MAPK11/MAPK14	3
GO:0044550	GO:0044550	secondary metabolite biosynthetic process	2/222	29/18670	0.0463105	0.211856	0.172531	CBS/CBSL	2
GO:0090162	GO:0090162	establishment of epithelial cell polarity	2/222	29/18670	0.0463105	0.211856	0.172531	CDC42/RHOA	2
GO:1902624	GO:1902624	positive regulation of neutrophil migration	2/222	29/18670	0.0463105	0.211856	0.172531	RAC1/RAC2	2
GO:2000727	GO:2000727	positive regulation of cardiac muscle cell differentiation	2/222	29/18670	0.0463105	0.211856	0.172531	KAT2A/PARP2	2
GO:0006625	GO:0006625	protein targeting to peroxisome	3/222	68/18670	0.0473059	0.214778	0.17491	ACAA1/HAO1/ECI2	3
GO:0072662	GO:0072662	protein localization to peroxisome	3/222	68/18670	0.0473059	0.214778	0.17491	ACAA1/HAO1/ECI2	3
GO:0072663	GO:0072663	establishment of protein localization to peroxisome	3/222	68/18670	0.0473059	0.214778	0.17491	ACAA1/HAO1/ECI2	3
GO:0009201	GO:0009201	ribonucleoside triphosphate biosynthetic process	3/222	69/18670	0.0490377	0.217542	0.177161	AK4/CTPS1/PARP1	3
GO:0015909	GO:0015909	long-chain fatty acid transport	3/222	69/18670	0.0490377	0.217542	0.177161	FABP1/FABP3/FABP4	3
GO:0042698	GO:0042698	ovulation cycle	3/222	69/18670	0.0490377	0.217542	0.177161	ESR1/GABRB1/HSPA5	3
GO:0071300	GO:0071300	cellular response to retinoic acid	3/222	69/18670	0.0490377	0.217542	0.177161	ABL2/AQP1/EPHA3	3
GO:0032728	GO:0032728	positive regulation of interferon-beta production	2/222	30/18670	0.0492388	0.217542	0.177161	PTPN11/RIPK2	2
GO:0046320	GO:0046320	regulation of fatty acid oxidation	2/222	30/18670	0.0492388	0.217542	0.177161	FABP1/FABP3	2
GO:0048873	GO:0048873	homeostasis of number of cells within a tissue	2/222	30/18670	0.0492388	0.217542	0.177161	PTPN11/RAC3	2
GO:0051491	GO:0051491	positive regulation of filopodium assembly	2/222	30/18670	0.0492388	0.217542	0.177161	CDC42/RHOQ	2
GO:0071549	GO:0071549	cellular response to dexamethasone stimulus	2/222	30/18670	0.0492388	0.217542	0.177161	AQP1/NR3C1	2
GO:0090022	GO:0090022	regulation of neutrophil chemotaxis	2/222	30/18670	0.0492388	0.217542	0.177161	RAC1/RAC2	2
GO:1903205	GO:1903205	regulation of hydrogen peroxide-induced cell death	2/222	30/18670	0.0492388	0.217542	0.177161	PYCR1/RACK1	2
